# Supplementary material for: Synthesis of homoazafullerene [C59N(CH2)]R and azahomoazafullerene [C59N(NH)]R
Source: Royal Society of Chemistry journal article supplement (doi:10.1039/c7qo00098g), 2017-01-01
Supplement: c7qo00098g1.pdf [file c7qo00098g1.pdf]

## Table of Contents

General synthetic procedure compounds **4b-16** for S2-S18

<sup>1</sup>H and <sup>13</sup>C NMR and IR spectra for compound **4b** S19-S21

<sup>1</sup>H and <sup>13</sup>C NMR and HRMS spectra for compounds **5a-f** S22-S33

<sup>1</sup>H and <sup>13</sup>C NMR spectra for compound **6** S34-S35

<sup>1</sup>H and <sup>13</sup>C NMR spectra for compounds **7a-c** S36-S41

<sup>1</sup>H and <sup>13</sup>C NMR spectra for compounds **8** and **9** S42-S44

<sup>1</sup>H and <sup>13</sup>C NMR spectra for compound **10** S45-S46

<sup>1</sup>H and <sup>13</sup>C NMR spectra for compound **11** S47-S48

<sup>1</sup>H and <sup>13</sup>C NMR spectra for compounds **12a-d** S49-S56

<sup>1</sup>H and <sup>13</sup>C NMR spectra for compound **13** S57-S58

<sup>1</sup>H and <sup>13</sup>C NMR spectra for compound **14** S59-S60

<sup>1</sup>H and <sup>13</sup>C NMR spectra for compound **15** S61-S62

<sup>1</sup>H and <sup>13</sup>C NMR spectra for compound **16** S63-S65

UV-Vis spectra for compounds **5a**, **5b**, **5d** & **5d**+KBPh<sub>4</sub>, **5e**, **5f**, **6** S66

UV-Vis spectra for compounds **8** and **9**, **10**, **12a**, **12b**, **12d**, **13**, **14**, **15**, **16** S67

All reagents were used as received. All solvents were used as received. The reactions were carried out under atmosphere condition. The NMR spectra were obtained at 25 °C with 400, 500 and 600 MHz spectrometers ( $^1\text{H}$  and  $^{13}\text{C}$  NMR spectra for the same compound were obtained with different spectrometers and different solvents in some cases). Chemical shifts are given in ppm relative to TMS or  $\text{CDCl}_3$  (for  $^{13}\text{C}$  NMR). ESI-FT-ICR-HRMS spectra were recorded in positive or negative mode. Chromatographic purifications were carried out with silica gel of mesh 200-300. Known compounds were characterized by comparison of their  $^1\text{H}$  NMR data with literature data as cited.

Note: common impurities such as residue solvent toluene and grease from silica gel are sometimes impossible to be removed from the fullerene derivatives by routine flash column chromatography. Further purification by a diffusion-precipitation procedure was usually required to obtain pure samples. The diffusion-precipitation solvents are  $\text{CS}_2/\text{CH}_3\text{CN}$  or  $\text{CS}_2/\text{hexane}$ .

#### Preparation of Compound 4b:

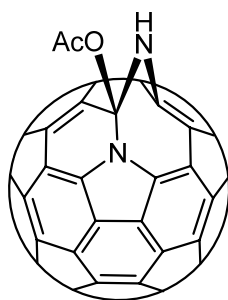

A solution of compound **4a** (50 mg, 0.060 mmol) in 12.5 mL of PhCl was stirred in a sealed tube. Then HOAc (2.5 mL) and  $\text{Ac}_2\text{O}$  (2.5 mL) were added to the solution. The resulting solution was stirred at 150 °C for 18 hours. The solution was evaporated under vacuum. And then the residue was directly chromatographed on a silica gel column. Eluting with  $\text{CS}_2$  gave the first brown band as unreacted compound **4a** (11.7 mg, 0.014 mmol, 23.4%), the second brown band as compound **4b** (20 mg, 0.025 mmol, 42%).

#### Characterization data for 4b:

$^1\text{H}$  NMR (500 MHz,  $\text{CS}_2/\text{CDCl}_3$ )  $\delta$  8.92 (s, 1H), 2.63 (s, 3H).

$^{13}\text{C}$  NMR (126 MHz,  $\text{CS}_2/\text{CDCl}_3$ ) (all signals represent 1C except as noted)  $\delta$  170.13 (C=O), 148.65, 148.55, 148.18, 147.31, 147.25, 146.89, 146.85, 146.70, 146.12 (2C), 145.96, 145.89, 145.84, 145.78, 145.73, 145.58, 145.51, 145.40, 145.36, 144.99, 144.94, 144.92, 144.67, 144.56 (2C), 144.15, 143.70, 143.49, 143.41, 143.17, 142.90 (2C), 142.84, 142.20, 141.69, 141.57, 141.53, 141.47, 140.95, 140.33, 138.58, 137.95, 137.82, 137.80, 137.62, 136.71, 136.54, 135.95, 134.66, 134.44, 133.65, 133.59, 133.45, 133.30, 132.73, 131.78, 126.28, 125.91, 99.12 (1C,  $\text{sp}^3$ ), 21.67 ( $\text{CH}_3$ ).

FT-IR (microscope): 3320, 1754, 1542, 1512, 1456, 1425, 1364, 1225, 1212, 1005, 931,  $921\text{cm}^{-1}$ .

ESI-FT-ICR-HRMS-Positive  $C_{59}HN_2$  ( $M - OAc^-$ ) calculated 737.0134, found 737.0149;  $C_{60}H_5N_2O$  ( $M - OAc^- + CH_3OH$ ) calculated 769.0396, found 769.0423.

#### Preparation of Compound 5a:

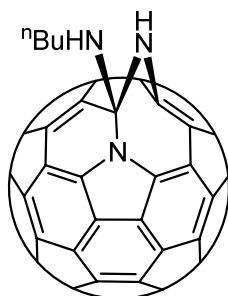

To a solution of the compound **3** (100 mg, 0.089 mmol) in 20 mL toluene was added  $BBr_3$  (0.1 mL). The mixture was stirred for about 10 minutes at room temperature followed by adding 20 mL toluene. Then the solution was quenched by water and the organic layer was mixed with  $PPh_3$  (100 mg, 0.38 mmol). The solution was stirred at room temperature for 5 minutes and then *n*-butylamine (1 mL) was added. The resulting solution was stirred at room temperature for 5 minutes and then first purified by silica gel column chromatography eluting with toluene:trimethylamine (TEA) (600:1) as a greenish band. The crude product was further purified by silica gel column chromatography eluting with  $CS_2$ :TEA:EA (600:1:6) to give compound **5a** as a brown solid (9.8 mg, 0.012 mmol, 14%).

#### Characterization data for 5a:

$^1H$  NMR (500 MHz,  $CS_2/CDCl_3$ )  $\delta$  12.82 (s, 1H), 6.92 (s, 1H), 4.82-4.75 (m, 1H), 4.68-4.61 (m, 1H), 2.43-2.37 (m, 2H), 2.04-1.96 (m, 2H), 1.37-1.33 (m, 3H).

$^{13}C$  NMR (126 MHz,  $CS_2/CDCl_3$ ) (Because of poor solubility of compound **5a** in common organic solvent, the suitable  $^{13}C$  NMR cannot be obtained. Selective signals, which correspond to the butyl groups, were shown below based on  $^{13}C$  NMR we obtained.)  $\delta$  42.59 (1 $CH_2$ ), 31.87 (1 $CH_2$ ), 20.88 (1 $CH_2$ ), 14.28 (1 $CH_3$ ).

ESI-FT-ICR-HRMS-Positive  $C_{63}H_{12}N_3$  ( $M + H^+$ ) calculated 810.1026, found 810.1049.

#### Preparation of Compound 5b:

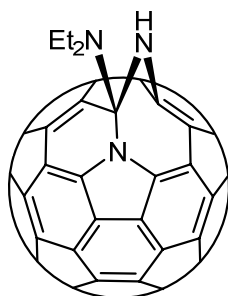

To a solution of the compound **3** (100 mg, 0.089 mmol) in 20 mL toluene was added  $BBr_3$  (0.1 mL). The mixture was stirred for about 10 minutes at room temperature followed by adding 20 mL toluene. Then the solution was quenched by water and

the organic layer was mixed with PPh<sub>3</sub> (100 mg, 0.38 mmol). The solution was stirred at room temperature for 5 minutes and then diethylamine (1 mL) was added. The resulting solution was stirred at room temperature for 5 minutes and then first purified by silica gel column chromatography eluting with toluene as a greenish band. The crude product was further purified by silica gel column chromatography eluting with CS<sub>2</sub> to give compound **5b** as a brown solid (19.7 mg, 0.024 mmol, 27%).

**Characterization data for 5b:**

<sup>1</sup>H NMR (500 MHz, CS<sub>2</sub>/CDCl<sub>3</sub>)  $\delta$  13.40 (s, 1H), 5.07-5.03 (m, 1H), 4.72-4.67 (m, 1H), 4.38-4.31 (m, 2H), 2.11-2.08 (t,  $J$  = 7.15 Hz, 3H), 1.87-1.84 (t,  $J$  = 7.17 Hz, 3H).

<sup>13</sup>C NMR (126 MHz, CS<sub>2</sub>/CDCl<sub>3</sub>) (all signals represent 1C except as noted)  $\delta$  157.63, 151.13, 150.31, 149.24, 148.40, 148.09, 147.93, 147.78, 147.61, 147.25, 147.11, 146.94, 146.88, 146.81, 146.75 (2C), 146.55, 146.30, 146.17, 146.06, 146.05, 145.73, 145.52, 145.51, 145.49, 145.17, 145.12, 144.78, 143.69, 143.17, 143.14, 143.07, 142.84, 142.72, 142.71, 142.57, 141.59, 141.52, 141.35, 140.66, 140.36, 139.89, 139.21, 138.20, 137.90, 137.75, 137.13, 135.58, 135.49, 135.47, 135.25, 134.36, 133.27, 131.00, 128.45, 128.32, 127.77, 124.18, 113.38 (1C, sp<sup>3</sup>), 46.47 (1CH<sub>2</sub>), 43.11 (1CH<sub>2</sub>), 15.29 (1CH<sub>3</sub>), 13.36 (1CH<sub>3</sub>).

ESI-FT-ICR-HRMS-Positive C<sub>63</sub>H<sub>12</sub>N<sub>3</sub> (M + H<sup>+</sup>) calculated 810.1026, found 810.1040.

**Preparation of Compound 5c:**

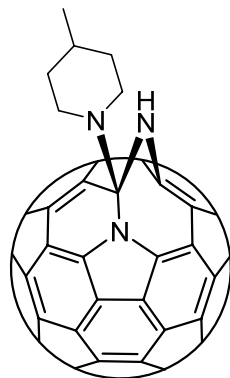

To a solution of the compound **3** (100 mg, 0.089 mmol) in 20 mL toluene was added BBr<sub>3</sub> (0.1 mL). The mixture was stirred for about 10 minutes at room temperature followed by adding 20 mL toluene. Then the solution was quenched by water and the organic layer was mixed with PPh<sub>3</sub> (100 mg, 0.38 mmol). The solution was stirred at room temperature for 5 minutes and then 4-methylpiperidine (1 mL) was added. The resulting solution was stirred at room temperature for 5 minutes and then first purified by silica gel column chromatography eluting with toluene as a greenish band. The crude product was further purified by silica gel column chromatography eluting with CS<sub>2</sub> to give compound **5c** as a brown solid (18 mg, 0.022 mmol, 24%).

**Characterization data for 5c:**

Because of steric hindrance and restricted rotation in compound **5c**, signal broadening phenomenon has been observed. It was not possible to give accurate integrals for  $^1\text{H}$  NMR. Selective signals of NMR data were shown below.  $^{13}\text{C}$  NMR was not obtained.

$^1\text{H}$  NMR (500 MHz,  $\text{CS}_2/\text{CDCl}_3$ )  $\delta$  13.49, 13.32, 7.26, 6.47, 6.45, 6.21, 6.18, 5.11, 5.08, 4.99, 4.96, 4.46, 4.44, 4.28, 4.27, 4.26, 4.25, 4.25, 4.23, 4.22, 4.21, 3.95, 3.93, 3.82, 3.79, 3.77, 3.77, 3.67, 3.67, 3.66, 3.65, 3.64, 3.62, 3.62, 3.54, 3.52, 3.49, 2.57, 2.54, 2.46, 2.45, 2.43, 2.41, 2.31, 2.29, 2.28, 2.27, 2.26, 2.24, 2.22, 2.19, 2.15, 2.12, 2.04, 2.01, 1.32, 1.30, 1.29, 1.27, 1.21, 1.20.

ESI-FT-ICR-HRMS-Positive  $\text{C}_{65}\text{H}_{14}\text{N}_3$  ( $\text{M} + \text{H}^+$ ) calculated 836.1182, found 836.1154.

#### Preparation of Compound **5d**:

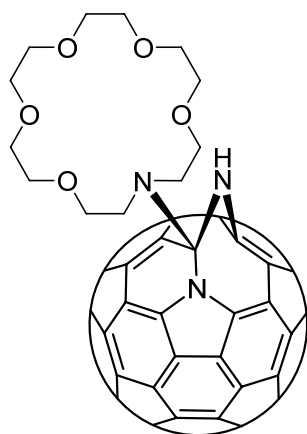

To a solution of the compound **3** (100 mg, 0.089 mmol) in 20 mL toluene was added  $\text{BBr}_3$  (0.1 mL). The mixture was stirred for about 10 minutes at room temperature followed by adding 20 mL toluene. Then the solution was quenched by water and the organic layer was mixed with  $\text{PPh}_3$  (100 mg, 0.38 mmol). The solution was stirred at room temperature for 5 minutes and then pyridine (1 mL) and N-18-c-6 (100 mg) were added. The resulting solution was stirred at room temperature for 5 minutes and then first purified by silica gel column chromatography eluting with toluene/dichloromethane/methanol (16:4:1) as a greenish band. The crude product was further purified by silica gel column chromatography eluting with  $\text{CS}_2/\text{EA}$  (ethylacetate) (3:1) to give compound **5d** as a brown solid (10 mg, 0.010 mmol, 11%).

#### Characterization data for **5d**:

Because of poor solubility of compound **5d** in common organic solvent, the suitable CNMR cannot be obtained.

$^1\text{H}$  NMR (500 MHz,  $\text{CS}_2/\text{CDCl}_3$ )  $\delta$  13.02 (s, 1H), 5.31-5.27 (m, 1H), 4.95-4.92 (m, 1H), 4.71-4.51 (m, 5H), 4.29-4.25 (m, 1H), 4.22-4.19 (m, 1H), 4.11-3.69 (m, 15H).

ESI-FT-ICR-HRMS-Positive  $\text{C}_{71}\text{H}_{26}\text{N}_3\text{O}_5$  ( $\text{M} + \text{H}^+$ ) calculated 1000.1867, found 1000.1851.

**MS for (5d+KBPh<sub>4</sub>):** ESI-FT-ICR-HRMS-Positive  $\text{C}_{71}\text{H}_{26}\text{N}_3\text{O}_5$  ( $\text{M} + \text{H}^+$ ) calculated 1000.1867, found 1000.1847;  $\text{C}_{71}\text{H}_{25}\text{N}_3\text{O}_5\text{Na}$  ( $\text{M} + \text{Na}^+$ ) calculated 1022.1686,

found 1022.1665;  $C_{71}H_{25}N_3O_5K$  ( $M + K^+$ ) calculated 1038.1426, found 1038.1409

#### Preparation of Compound 5e:

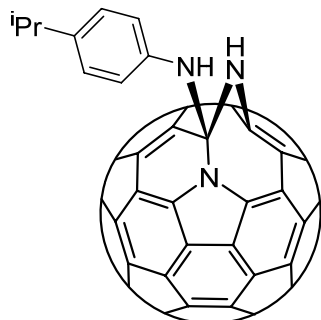

To a solution of the compound **3** (100 mg, 0.089 mmol) in 20 mL toluene was added  $BBr_3$  (0.1 mL). The mixture was stirred for about 10 minutes at room temperature followed by adding 20 mL toluene. Then the solution was quenched by water and the organic layer was mixed with  $PPh_3$  (100 mg, 0.38 mmol). The solution was stirred at room temperature for 5 minutes and then 4-isopropylaniline (1 mL) was added. The resulting solution was stirred at room temperature for 5 minutes and then first purified by silica gel column chromatography eluting with toluene as a greenish band. The crude product was further purified by silica gel column chromatography eluting with  $CS_2$ :EA (100:1) to give compound **5e** as a brown solid (13.6 mg, 0.016 mmol, 18%).

#### Characterization data for 5e:

$^1H$  NMR (500 MHz,  $CS_2/CDCl_3$ )  $\delta$  7.68 (d,  $J = 8.3$  Hz, 2H), 7.38 (d,  $J = 8.3$  Hz, 2H), 7.29 (s, 1H), 5.89 (s, 1H), 3.04-2.98 (m, 1H), 1.40 (s, 3H), 1.38 (s, 3H).

$^{13}C$  NMR (126 MHz,  $CS_2/CDCl_3$ ) (all signals represent 1C except as noted)  $\delta$  148.76, 148.55, 148.10, 147.54, 147.43, 146.89, 146.83, 146.34, 146.19, 146.17, 146.07, 146.05, 145.87, 145.85, 145.69, 145.58, 145.49, 145.42, 145.15, 145.08, 145.02, 144.82, 144.56, 144.49, 144.28, 143.69, 143.58, 143.39, 143.29, 143.09, 142.99, 142.96, 142.91, 142.21, 141.78, 141.64, 141.52, 141.46, 140.93, 139.72, 138.89, 138.55, 137.92, 137.73, 137.66, 137.17, 136.88, 136.59, 135.95, 134.84, 134.81, 134.35, 134.03, 133.45, 133.29, 132.53, 127.64, 127.15, 125.75, 120.76, 89.99 (1C,  $sp^3$ ), 33.68 (1C,  $CH(CH_3)_2$ ), 24.10 (2C,  $CH(CH_3)_2$ ).

ESI-FT-ICR-HRMS-Positive  $C_{68}H_{14}N_3$  ( $M + H^+$ ) calculated 872.1182, found 872.1201.

#### Preparation of Compound 5f:

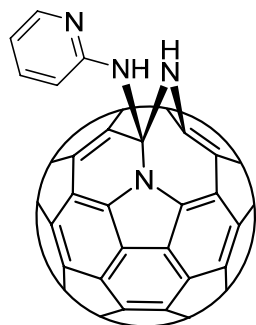

To a solution of the compound **3** (100 mg, 0.089 mmol) in 20 mL toluene was added BBr<sub>3</sub> (0.1 mL). The mixture was stirred for about 10 minutes at room temperature followed by adding 20 mL toluene. Then the solution was quenched by water and the organic layer was mixed with PPh<sub>3</sub> (100 mg, 0.38 mmol). The solution was stirred at room temperature for 5 minutes and then 2-aminopyridine (500 mg) was added. The resulting solution was stirred at room temperature for 5 minutes and then first purified by silica gel column chromatography eluting with toluene as a greenish band. The crude product was further purified by silica gel column chromatography eluting with CS<sub>2</sub>:EA (50:1) to give compound **5f** as a brown solid (13.6 mg, 0.016 mmol, 18%).

**Characterization data for 5f:**

<sup>1</sup>H NMR (500 MHz, CS<sub>2</sub>/CDCl<sub>3</sub>)  $\delta$  10.48 (s, 1H), 8.65 (d,  $J$  = 4.7 Hz, 1H), 7.81-7.78 (m, 1H), 7.08-7.06 (m, 2H), 7.00 (d,  $J$  = 8.2 Hz, 1H).

<sup>13</sup>C NMR (126 MHz, CS<sub>2</sub>/CDCl<sub>3</sub>) (all signals represent 1C except as noted)  $\delta$  156.03, 151.48, 148.98, 148.86, 148.36, 147.89, 147.62, 147.44, 146.92, 146.67, 146.24, 146.16, 146.10, 145.97, 145.85, 145.64, 145.62, 145.47, 145.42, 145.18, 145.08, 144.68, 144.62, 144.05, 143.76, 143.02, 142.98, 142.74, 142.12, 141.97, 141.73, 141.28, 140.93, 138.75, 138.44, 138.13, 137.56, 137.45, 137.38, 136.99, 136.83, 135.87, 134.90, 134.31, 134.22, 133.73, 133.53, 132.96, 132.54, 126.71, 124.75, 116.10, 111.12, 89.33 (1C, sp<sup>3</sup>).

ESI-FT-ICR-HRMS-Positive C<sub>64</sub>H<sub>7</sub>N<sub>4</sub> (M + H<sup>+</sup>) calculated 831.0665, found 831.0679.

**Preparation of Compound 6:**

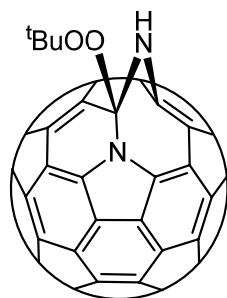

To a solution of the compound **3** (100 mg, 0.089 mmol) in 20 mL toluene was added BBr<sub>3</sub> (0.1 mL). The mixture was stirred for about 10 minutes at room temperature followed by adding 20 mL toluene. Then the solution was quenched by water and the organic layer was mixed with PPh<sub>3</sub> (100 mg, 0.38 mmol). The solution was stirred at room temperature for 5 minutes and then *t*-butyl hydroperoxide (70%, 3 ml) was added. The resulting solution was stirred at room temperature for 5 minutes and then first purified by silica gel column chromatography eluting with toluene as a greenish band. The crude product was further purified by silica gel column chromatography eluting with CS<sub>2</sub> to give compound **6** as a brown solid (12 mg, 0.015 mmol, 16%).

**Characterization data for 6:**

<sup>1</sup>H NMR (500 MHz, CS<sub>2</sub>/CDCl<sub>3</sub>)  $\delta$  7.78 (s, 1H), 1.77 (s, 9H).

$^{13}\text{C}$  NMR (126 MHz,  $\text{CS}_2/\text{CDCl}_3$ ) (all signals represent 1C except as noted)  $\delta$  149.63, 148.73, 148.25, 147.95, 147.56, 147.46, 146.95, 146.91, 146.23, 146.15, 146.08 (2C), 145.95 (2C), 145.85, 145.73 (2C), 145.65, 145.47, 145.26, 145.16, 145.08, 144.72, 144.66, 144.56, 144.18, 143.78, 143.67, 143.39, 143.19, 143.05, 143.00, 142.99, 142.26, 141.96, 141.85, 141.70, 141.47, 141.14, 140.32, 138.84, 137.94, 137.89, 137.80, 137.73, 137.50, 137.25, 135.53 (2C), 135.09, 134.11, 134.07, 133.69, 133.68, 132.75, 130.57, 126.59, 125.50, 102.15 (1C,  $\text{sp}^3$ ), 82.90 ( $\text{C}(\text{CH}_3)_3$ ), 26.97 (3C,  $\text{C}(\text{CH}_3)_3$ ).

ESI-FT-ICR-HRMS-Positive  $\text{C}_{63}\text{H}_{11}\text{N}_2\text{O}_2$  ( $\text{M} + \text{H}^+$ ) calculated 827.0815, found 827.0823.

### Preparation of Compound 7a:

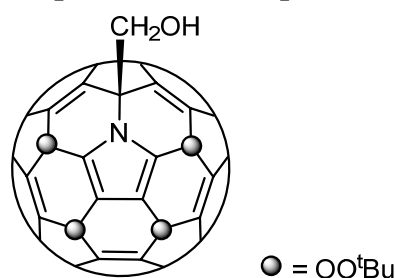

A solution of compound **1** (1 g, 0.927 mmol) in 167 mL of PhCl was stirred at 80 °C. Then paraformaldehyde (2.78 g, 92.7 mmol) and DABCO (1.04 g, 9.27 mmol) were added to the solution. The resulting solution was stirred at 80 °C for 2 hours. The solution was directly chromatographed on a silica gel column eluting with toluene to separate unreacted compound **1** and byproduct. Eluting with toluene/ethyl acetate (20:1) gave the red band as compound **7a** (513 mg, 0.463 mmol, 50%).

### Characterization data for 7a:

$^1\text{H}$  NMR (500 MHz,  $\text{CDCl}_3$ )  $\delta$  4.90 (d,  $J = 6.9$  Hz, 2H), 2.76 (t,  $J = 7.1$  Hz, 1H), 1.46 (s, 18H), 1.44 (s, 18H).

$^{13}\text{C}$  NMR (126 MHz,  $\text{CDCl}_3$ ) (all signals represent 2C except as noted)  $\delta$  149.74, 149.39, 149.13 (1C), 149.10, 149.04, 148.65, 147.43, 147.40, 147.27, 147.22, 147.19, 147.12, 146.77, 146.66, 146.58, 146.50, 146.44 (1C), 146.26, 145.35, 145.24, 145.18, 143.56, 143.37, 143.30, 142.69, 141.28, 137.17, 129.79, 83.13 (2C,  $\text{sp}^3$ ), 82.06 (2C,  $\text{C}(\text{CH}_3)_3$ ), 81.40 (2C,  $\text{C}(\text{CH}_3)_3$ ), 81.32 (2C,  $\text{sp}^3$ ), 73.64 (1C,  $\text{sp}^3$ ), 68.28 (1C), 26.82 (6C), 26.81 (6C).

ESI-FT-ICR-HRMS-Positive  $\text{C}_{76}\text{H}_{40}\text{NO}_9$  ( $\text{M} + \text{H}^+$ ) calculated 1110.2698, found 1110.2685.

### Preparation of Compound 7b:



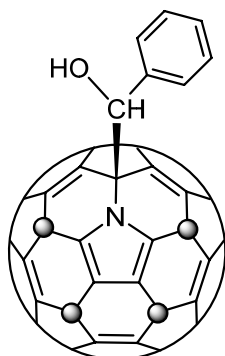

A solution of compound **1** (105 mg, 0.097 mmol) in 15 mL of toluene was stirred at 25 °C. Then benzaldehyde (6 mL) and 4-methylpiperidine (1.5 mL) were added to the solution. The resulting solution was stirred at 25 °C for 2.5 hours. Then the solution was washed by hydrochloric acid (2M) and water for 3 times respectively. The organic layer was first purified by silica gel column chromatography eluting with petroleum ether. The crude product was further washed by toluene and methanol to give the compound **7b** (34 mg, 0.029 mmol, 30%).

**Characterization data for 7b:**

$^1\text{H}$  NMR (400 MHz,  $\text{CDCl}_3$ )  $\delta$  7.58-7.56 (m, 2H), 7.30-7.28 (m, 3H), 6.13 (d,  $J$  = 3.6 Hz, 1H), 3.62 (d,  $J$  = 4.1 Hz, 1H), 1.53 (s, 9H), 1.50 (s, 9H), 1.47 (s, 9H), 1.45 (s, 9H).

$^{13}\text{C}$  NMR (126 MHz,  $\text{CDCl}_3$ ) (all signals represent 1C except as noted)  $\delta$  150.56, 149.69, 149.04, 149.02 (2C), 148.98, 148.95, 148.86, 148.72, 147.50, 147.42, 147.35, 147.30, 147.29, 147.22, 147.21, 147.20, 147.19, 146.94, 146.81, 146.79, 146.72, 146.69, 146.67, 146.61, 146.57, 146.56, 146.48, 146.43, 146.41, 146.37, 146.29, 146.21, 145.53, 145.41, 145.12, 145.10, 145.08, 144.76, 144.54, 143.38 (2C), 143.26, 143.23, 143.16, 142.65, 142.58, 141.65, 140.54, 137.62 (2C), 137.58, 136.72, 130.25, 129.66, 128.66, 128.05 (2C), 127.83 (2C), 83.20 (1C,  $\text{sp}^3$ ), 83.09 (1C,  $\text{sp}^3$ ), 82.21 ( $\text{C}(\text{CH}_3)_3$ ), 81.90 ( $\text{C}(\text{CH}_3)_3$ ), 81.51 ( $\text{C}(\text{CH}_3)_3$ ), 81.40 (1C,  $\text{sp}^3$ ), 81.37 (1C,  $\text{sp}^3$ ), 81.34 ( $\text{C}(\text{CH}_3)_3$ ), 78.81 (1C,  $\text{sp}^3$ ), 77.63 (1C), 27.01 (3C), 26.84 (6C), 26.81 (3C). ESI-FT-ICR-HRMS-Positive  $\text{C}_{82}\text{H}_{44}\text{NO}_9$  ( $\text{M} + \text{H}^+$ ) calculated 1186.3011 found 1186.2985.

**Preparation of Compound 7c:**

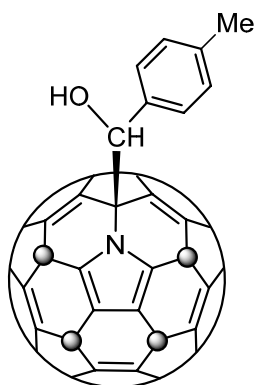

A solution of compound **1** (75 mg, 0.070 mmol) in 10 mL of toluene was stirred at

25 °C. Then *p*-tolualdehyde (4 mL) and 4-methylpiperidine (1 mL) were added to the solution. The resulting solution was stirred at 25 °C for 2 hours. Then the solution was washed by hydrochloric acid (2M) and water for 3 times respectively. And the organic layer was separated and evaporated. The residue was directly chromatographed on a silica gel column eluting with toluene to separate unreacted compound **1** and byproduct. Eluting with toluene/ethyl acetate (40:1) gave the red band as compound **7c** (26.3 mg, 0.022 mmol, 31%).

**Characterization data for 7c:**

<sup>1</sup>H NMR (500 MHz, CDCl<sub>3</sub>) δ 7.44 (d, *J* = 8.1 Hz, 2H), 7.08 (d, *J* = 8.0 Hz, 2H), 6.09 (d, *J* = 3.7 Hz, 1H), 3.57 (d, *J* = 4.1 Hz, 1H), 2.28 (s, 3H), 1.53 (s, 9H), 1.50 (s, 9H), 1.47 (s, 9H), 1.45 (s, 9H).

<sup>13</sup>C NMR (126 MHz, CDCl<sub>3</sub>) (all signals represent 1C except as noted) δ 150.62, 149.69, 149.04, 149.02, 149.00 (2C), 148.96, 148.94, 148.91, 148.86, 147.54, 147.49, 147.34, 147.29, 147.28, 147.23, 147.21, 147.19 (2C), 146.95, 146.94, 146.85, 146.78, 146.72, 146.68, 146.61, 146.60, 146.56, 146.48, 146.43 (2C), 146.37, 146.29, 146.21, 145.41, 145.14, 145.10 (2C), 144.77, 144.55, 143.36, 143.35 (2C), 143.25, 143.22, 143.13, 142.64, 142.57, 141.62, 140.49, 138.29, 137.55, 136.72, 134.63, 130.21, 129.60, 128.77 (2C), 127.69 (2C), 83.20 (1C, sp<sup>3</sup>), 83.10 (1C, sp<sup>3</sup>), 82.16 (C(CH<sub>3</sub>)<sub>3</sub>), 81.87 (C(CH<sub>3</sub>)<sub>3</sub>), 81.50 (C(CH<sub>3</sub>)<sub>3</sub>), 81.41 (1C, sp<sup>3</sup>), 81.37 (1C, sp<sup>3</sup>), 81.33 (C(CH<sub>3</sub>)<sub>3</sub>), 78.68 (1C, sp<sup>3</sup>), 77.76 (1C), 26.99 (3C), 26.84 (6C), 26.81 (3C), 21.25 (1C).

ESI-FT-ICR-HRMS-Positive C<sub>83</sub>H<sub>46</sub>NO<sub>9</sub> (M + H<sup>+</sup>) calculated 1200.3167, found 1200.3162.

**Preparation of Compounds 8 and 9:**

A solution of compound **7a** (335 mg, 0.302 mmol) in 56 mL of freshly distilled CH<sub>2</sub>Cl<sub>2</sub> was stirred at 25 °C. Then PCl<sub>5</sub> (1.675 g, 8.03 mmol) were added to the solution. The resulting solution was stirred at 25 °C for 5-10 minutes. Then the reaction was quenched with water. The solution was washed by saturated sodium bicarbonate solution and water for 3 times respectively. And the organic layer was separated and evaporated. The residue was directly chromatographed on a silica gel column. Eluting with toluene gave the first red band as an inseparable mixture of compound **8** and **9** (250 mg, 0.222 mmol, 74%, ratio= 20:1).

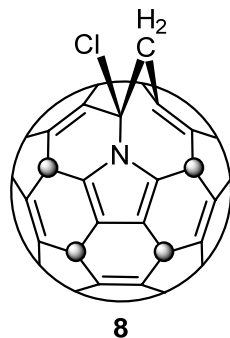

**Characterization data for 8:**

<sup>1</sup>H NMR (500 MHz, CDCl<sub>3</sub>) δ 4.96 (d, *J* = 13.1 Hz, 1H), 4.29 (d, *J* = 13.1 Hz, 1H), 1.49 (s, 9H), 1.45 (s, 9H), 1.42 (s, 9H), 1.41 (s, 9H).

$^{13}\text{C}$  NMR (126 MHz,  $\text{CDCl}_3$ ) (all signals represent 1C except as noted)  $\delta$  151.13, 150.82, 149.67, 149.29, 149.08, 148.51, 148.12 (2C), 147.95, 147.90, 147.70, 147.51, 147.47, 147.43, 147.28, 147.25, 147.19, 147.15 (2C), 146.94, 146.92, 146.69, 146.54, 146.47, 146.44, 146.31, 146.29, 145.87, 145.75, 145.54, 145.35, 145.24, 145.09, 144.27, 144.24 (3C), 143.46, 143.43, 143.38, 143.36, 142.75, 142.61, 142.54, 141.34, 139.71, 138.73, 136.50, 136.33, 135.43, 134.14, 132.61, 130.67, 129.68, 88.93 (1C,  $\text{sp}^3$ ), 85.12 (1C,  $\text{sp}^3$ ), 82.78 (1C,  $\text{sp}^3$ ), 82.16 ( $\text{C}(\text{CH}_3)_3$ ), 81.76 (1C,  $\text{sp}^3$ ), 81.52 ( $\text{C}(\text{CH}_3)_3$ ), 81.48 ( $\text{C}(\text{CH}_3)_3$ ), 81.37 ( $\text{C}(\text{CH}_3)_3$ ), 77.06 (1C,  $\text{sp}^3$ ), 38.79 (1C), 26.95 (3C), 26.88 (3C), 26.86 (3C), 26.81 (3C).

ESI-FT-ICR-HRMS-Positive  $\text{C}_{76}\text{H}_{42}\text{ClN}_2\text{O}_8$  ( $\text{M} + \text{NH}_4^+$ ) calculated 1145.2624, found 1145.2636.

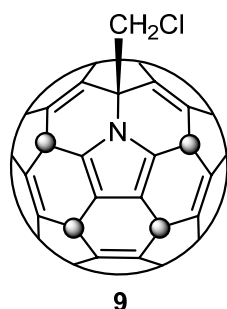

**Characterization data for 9:**

$^1\text{H}$  NMR (400 MHz,  $\text{CDCl}_3$ )  $\delta$  4.91 (s, 2H), 1.46 (s, 18H), 1.44 (s, 18H).

**Preparation of Compound 10:**

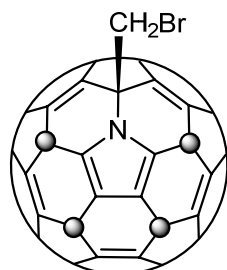

A solution of compound **7a** (50 mg, 0.045 mmol) in 10 mL of toluene was stirred at 35 °C. Then  $\text{PPh}_3$  (200 mg, 0.763 mmol) and NBS (200 mg, 1.12 mmol) were added to the solution. The resulting solution was stirred at 35 °C for 50 minutes. The solution was directly chromatographed on a silica gel column. Eluting with toluene gave the first red band as compound **10** (18 mg, 0.015 mmol, 33%).

**Characterization data for 10:**

$^1\text{H}$  NMR (500 MHz,  $\text{CDCl}_3$ )  $\delta$  4.79 (s, 2H), 1.46 (s, 18H), 1.44 (s, 18H).

$^{13}\text{C}$  NMR (126 MHz,  $\text{CDCl}_3$ ) (all signals represent 2C except as noted)  $\delta$  149.81, 149.11 (1C), 149.08, 149.07, 148.67, 148.48, 147.46, 147.31, 147.28, 147.26, 147.08, 146.88, 146.83, 146.55, 146.41 (3C), 146.35, 146.12, 145.29, 145.12, 144.64, 143.71, 143.41, 143.30, 142.76, 141.15, 137.47, 129.14, 83.14 (2C,  $\text{sp}^3$ ), 82.18 (2C,  $\text{C}(\text{CH}_3)_3$ ), 81.45 (2C,  $\text{C}(\text{CH}_3)_3$ ), 80.96 (2C,  $\text{sp}^3$ ), 70.42 (1C,  $\text{sp}^3$ ), 36.18 (1C), 26.81 (6C), 26.74 (6C).

ESI-FT-ICR-HRMS-Positive  $C_{76}H_{39}BrNO_8$  ( $M + H^+$ ) calculated 1172.1854, found 1172.1875.

Crystal of compound **10** suitable for X-ray diffraction was obtained from slow evaporation in a mixture of carbon disulfide and ethanol. **Crystal Data** for  $C_{76}H_{38}BrNO_8$  ( $M=1172.98$  g/mol): monoclinic, space group  $P2_1/n$  (no. 14),  $a = 13.8397(9)$  Å,  $b = 24.2642(13)$  Å,  $c = 16.7166(13)$  Å,  $\beta = 109.444(8)^\circ$ ,  $V = 5293.4(7)$  Å<sup>3</sup>,  $Z = 4$ ,  $T = 180.00(10)$  K,  $\mu(\text{MoK}\alpha) = 0.845$  mm<sup>-1</sup>,  $D_{\text{calc}} = 1.472$  g/cm<sup>3</sup>, ? reflections measured ( $6.144^\circ \leq 2\theta \leq 52.044^\circ$ ), 10314 unique ( $R_{\text{int}} = ?$ ,  $R_{\text{sigma}} = 0.1648$ ) which were used in all calculations. The final  $R_1$  was 0.0699 ( $I > 2\sigma(I)$ ) and  $wR_2$  was 0.1714 (all data). CCDC 1522610 contains the supplementary crystallographic data for this paper. These data can be obtained free of charge from The Cambridge Crystallographic Data Centre.

### Preparation of Compound 11:

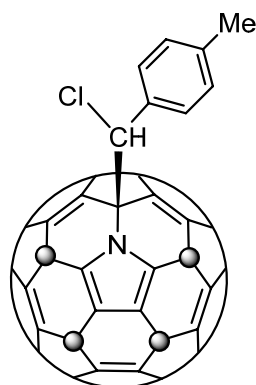

A solution of compound **7c** (16 mg, 0.013 mmol) in 4 mL of toluene was stirred at 25 °C. Then  $\text{PCl}_5$  were added to the solution. The resulting solution was stirred at 25 °C for 10 minutes. Then the reaction was quenched with water. The solution was washed by saturated sodium bicarbonate solution and water for 3 times respectively. And the organic layer was directly chromatographed on a silica gel column eluting with toluene to give the compound **11** almost quantitatively (15 mg, 0.012 mmol, 92%).

### Characterization data for 11:

$^1\text{H}$  NMR (500 MHz,  $\text{CDCl}_3$ )  $\delta$  7.49 (d,  $J = 7.9$  Hz, 2H), 7.10 (d,  $J = 7.9$  Hz, 2H), 6.46 (s, 1H), 2.29 (s, 3H), 1.53 (s, 9H), 1.48 (s, 18H), 1.44 (s, 9H).

$^{13}\text{C}$  NMR (126 MHz,  $\text{CDCl}_3$ ) (all signals represent 1C except as noted)  $\delta$  151.34, 149.80, 149.09, 149.08, 149.06, 149.00, 148.96, 148.71, 148.42, 148.07, 147.58, 147.50, 147.37 (2C), 147.31 (2C), 147.28, 147.21, 147.16, 147.03, 146.72 (3C), 146.69 (2C), 146.49, 146.48, 146.47, 146.42 (3C), 146.36, 146.27, 146.24, 145.65, 145.09, 145.06, 145.05, 144.62, 144.27, 143.45, 143.42, 143.34, 143.32, 143.28, 143.23, 142.73, 142.63, 142.52, 140.42, 139.09, 137.73, 137.62, 133.04, 130.07, 129.28 (2C), 129.03, 128.98 (2C), 83.21 (1C,  $\text{sp}^3$ ), 83.17 (1C,  $\text{sp}^3$ ), 82.60 ( $\text{C}(\text{CH}_3)_3$ ), 81.59 ( $\text{C}(\text{CH}_3)_3$ ), 81.48 ( $\text{C}(\text{CH}_3)_3$ ), 81.41 (1C,  $\text{sp}^3$ ), 81.31 ( $\text{C}(\text{CH}_3)_3$ ), 81.21 (1C,  $\text{sp}^3$ ), 75.84 (1C,  $\text{sp}^3$ ), 66.41 (1C), 26.95 (3C), 26.94 (3C), 26.87 (3C), 26.81 (3C), 21.28 (1C).

ESI-FT-ICR-HRMS-Positive  $C_{83}H_{45}ClNO_8$  ( $M + H^+$ ) calculated 1218.2828, found 1218.2865.

#### Preparation of Compound 12a:

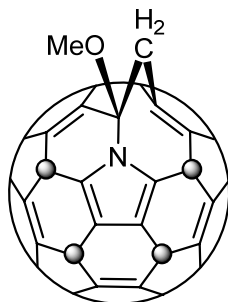

A solution of compound **8** and **9** (30 mg, ratio= 20:1, **8**: 0.025 mmol) in 5 mL of freshly distilled  $CH_2Cl_2$  was stirred at 25 °C. Then  $AgClO_4 \cdot H_2O$  (330 mg, 1.46 mmol) and MeOH (3 ml) were added to the solution. The resulting solution was stirred at 25 °C for 7 hours. Then the solution was washed by water for 3 times. And the organic layer was directly chromatographed on a silica gel column eluting with petroleum ether/toluene (1:1) to separate the first red band as unreacted compound **8** and **9**. Eluting with toluene gave the second red band as compound **12a** (8 mg, 0.007 mmol, 28%).

#### Characterization data for 12a:

$^1H$  NMR (500 MHz,  $CDCl_3$ )  $\delta$  4.69 (d,  $J = 12.2$  Hz, 1H), 3.80 (d,  $J = 12.2$  Hz, 1H), 3.66 (s, 3H), 1.48 (s, 9H), 1.46 (s, 9H), 1.43 (s, 9H), 1.38 (s, 9H).

$^{13}C$  NMR (126 MHz,  $CDCl_3$ ) (all signals represent 1C except as noted)  $\delta$  192.58, 151.83, 150.69, 149.66, 149.36, 148.96, 148.49, 148.18, 148.00, 147.86, 147.78 (2C), 147.50 (2C), 147.35 (2C), 147.30, 147.24 (2C), 147.12, 147.06, 147.04, 146.84, 146.54, 146.53, 146.45, 146.33, 145.94, 145.83, 145.65, 145.47, 144.78, 144.40 (2C), 144.11, 144.10, 144.04, 143.40, 143.38, 143.27, 143.24, 142.40, 142.33, 142.15, 141.15, 139.58, 138.79, 137.73, 137.09, 136.00, 133.41, 133.16, 129.74, 129.54, 90.55 (1C,  $sp^3$ ), 88.71 (1C,  $sp^3$ ), 85.60 (1C,  $sp^3$ ), 82.84 (1C,  $sp^3$ ), 81.86 (1C,  $sp^3$ ), 81.77 ( $C(CH_3)_3$ ), 81.37 ( $C(CH_3)_3$ ), 81.26 ( $C(CH_3)_3$ ), 81.17 ( $C(CH_3)_3$ ), 51.01 (1C), 31.04 (1C), 26.88 (3C), 26.86 (3C), 26.82 (3C), 26.75 (3C).

ESI-FT-ICR-HRMS-Positive  $C_{77}H_{42}NO_9$  ( $M + H^+$ ) calculated 1124.2854, found 1124.2821.

#### Preparation of Compounds 12b and 12d:

A solution of compound **8** and **9** (60 mg, ratio= 20:1, **8**: 0.051 mmol) in 10 mL of freshly distilled  $CH_2Cl_2$  was stirred at 25 °C. Then  $AgClO_4 \cdot H_2O$  (600 mg, 2.66 mmol) and EtOH (3 ml) were added to the solution. The resulting solution was stirred at 25 °C for 4 hours and then first purified by silica gel column chromatography eluting with  $CH_2Cl_2$ . The crude product was further purified by silica gel column chromatography eluting with petroleum ether/toluene (1:1) to separate the first red band as unreacted compound **8** and **9**, then give the second red band as compound **12b** (41mg, 0.036 mmol, 71%). Eluting with toluene gave the third red band as

byproduct difficult to be clearly characterized and the fourth band as compound **12d** (11 mg, 0.010 mmol, 20%).

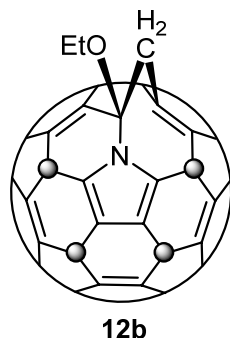

**Characterization data for 12b:**

$^1\text{H}$  NMR (500 MHz,  $\text{CDCl}_3$ )  $\delta$  4.72 (d,  $J = 12.2$  Hz, 1H), 4.03-3.97 (m, 1H), 3.85-3.80 (m, 2H), 1.54 (t,  $J = 7.0$  Hz, 3H), 1.47 (s, 9H), 1.46 (s, 9H), 1.42 (s, 9H), 1.38 (s, 9H).

$^{13}\text{C}$  NMR (126 MHz,  $\text{CDCl}_3$ ) (all signals represent 1C except as noted)  $\delta$  152.04, 150.65, 149.63, 149.34, 148.92, 148.45, 148.08, 147.96, 147.84, 147.78, 147.71, 147.58, 147.48, 147.37, 147.33, 147.25, 147.18, 147.07, 147.02 (2C), 146.79 (2C), 146.53, 146.49, 146.43, 146.31 (2C), 145.88, 145.77, 145.53, 145.43, 144.76, 144.38, 144.30, 144.05, 144.03, 144.00, 143.33 (2C), 143.28, 143.18, 142.35, 142.33, 142.32, 141.09, 139.56, 138.73, 137.80, 137.10, 136.10, 133.36, 133.00, 129.98, 129.18, 90.24 (1C,  $\text{sp}^3$ ), 88.67 (1C,  $\text{sp}^3$ ), 85.74 (1C,  $\text{sp}^3$ ), 82.80 (1C,  $\text{sp}^3$ ), 81.82 (1C,  $\text{sp}^3$ ), 81.75 ( $\text{C}(\text{CH}_3)_3$ ), 81.38 ( $\text{C}(\text{CH}_3)_3$ ), 81.30 ( $\text{C}(\text{CH}_3)_3$ ), 81.20 ( $\text{C}(\text{CH}_3)_3$ ), 59.72 (1C), 31.58 (1C), 26.87 (3C), 26.83 (3C), 26.80 (3C), 26.77 (3C), 15.20 (1C).

ESI-FT-ICR-HRMS-Positive  $\text{C}_{78}\text{H}_{44}\text{NO}_9$  ( $\text{M} + \text{H}^+$ ) calculated 1138.3011, found 1138.2997.

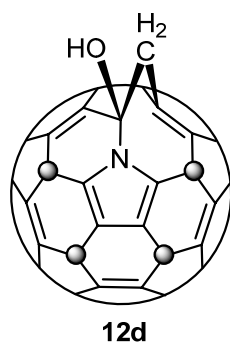

**Characterization data for 12d:**

$^1\text{H}$  NMR (500 MHz,  $\text{CDCl}_3$ )  $\delta$  5.95 (s, 1H), 4.52 (d,  $J = 12.7$  Hz, 1H), 3.97 (d,  $J = 12.7$  Hz, 1H), 1.47 (s, 9H), 1.45 (s, 9H), 1.44 (s, 9H), 1.42 (s, 9H).

$^{13}\text{C}$  NMR (126 MHz,  $\text{CDCl}_3$ ) (all signals represent 1C except as noted)  $\delta$  150.72, 149.66, 149.30, 149.13, 148.96, 148.67, 148.51, 148.24, 148.05, 147.97, 147.95, 147.78, 147.57, 147.54 (2C), 147.33, 147.17, 147.13, 147.07, 147.06, 146.95, 146.57, 146.44, 146.39, 146.34, 146.28, 146.20, 146.11, 145.69, 145.39, 145.36, 145.05, 144.36, 144.20, 144.18, 144.07, 143.82, 143.70, 143.54, 143.28, 143.20, 142.53 (2C),

142.36, 141.12, 139.98, 138.74, 138.00, 137.12, 134.75, 133.05, 131.44, 130.11, 129.12, 88.70 (1C, sp<sup>3</sup>), 86.18 (1C, sp<sup>3</sup>), 85.05 (1C, sp<sup>3</sup>), 82.78 (C(CH<sub>3</sub>)<sub>3</sub>), 82.69 (1C, sp<sup>3</sup>), 81.89 (C(CH<sub>3</sub>)<sub>3</sub>), 81.86 (1C, sp<sup>3</sup>), 81.46 (C(CH<sub>3</sub>)<sub>3</sub>), 81.32 (C(CH<sub>3</sub>)<sub>3</sub>), 34.04 (1C), 26.86 (3C), 26.81 (3C), 26.79 (3C), 26.64 (3C).

ESI-FT-ICR-HRMS-Positive C<sub>76</sub>H<sub>40</sub>NO<sub>9</sub> (M + H<sup>+</sup>) calculated 1110.2698, found 1110.2676; C<sub>76</sub>H<sub>43</sub>N<sub>2</sub>O<sub>9</sub> (M + NH<sub>4</sub><sup>+</sup>) calculated 1127.2963, found 1127.2970.

Crystal of compound **12d** suitable for X-ray diffraction was obtained from slow evaporation in a mixture of carbon disulfide and methanol. **Crystal Data** for C<sub>76</sub>H<sub>39</sub>NO<sub>9</sub> (*M* = 1110.08 g/mol): N/A, space group Pna2<sub>1</sub> (no. 33), *a* = 21.489(4) Å, *b* = 10.179(2) Å, *c* = 22.215(4) Å, *V* = 4859.2(17) Å<sup>3</sup>, *Z* = 4, *T* = 100 K, μ(MoKα) = 0.100 mm<sup>-1</sup>, *D*<sub>calc</sub> = 1.517 g/cm<sup>3</sup>, 27095 reflections measured (6.62° ≤ 2θ ≤ 62.52°), 14273 unique (*R*<sub>int</sub> = 0.0348, *R*<sub>sigma</sub> = N/A) which were used in all calculations. The final *R*<sub>1</sub> was 0.0656 (>2σ(I)) and *wR*<sub>2</sub> was 0.1998 (all data). CCDC 1522611 contains the supplementary crystallographic data for this paper. These data can be obtained free of charge from The Cambridge Crystallographic Data Centre.

### Preparation of Compound 12c:

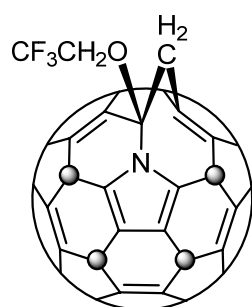

A solution of compound **8** and **9** (60 mg, ratio = 20:1, **8**: 0.051 mmol) in 6 mL of CH<sub>2</sub>Cl<sub>2</sub> was stirred at 25 °C. Then AgClO<sub>4</sub>·H<sub>2</sub>O (600 mg, 2.663 mmol) and CF<sub>3</sub>CH<sub>2</sub>OH (2 ml) were added to the solution. The resulting solution was stirred at 25 °C for 5 minutes. The reaction was terminated upon confirmation of complete conversion of compound **8** as indicated by TLC. Then the solution was washed by water for 3 times. And the organic layer was directly chromatographed on a silica gel column eluting with petroleum ether/toluene (1:1) to separate the first red band as byproduct difficult to be clearly characterized and give the second red band as compound **12c** (18 mg, 0.015 mmol, 29%).

### Characterization data for 12c:

<sup>1</sup>H NMR (400 MHz, CDCl<sub>3</sub>) δ 4.72 (d, *J* = 12.2 Hz, 1H), 4.19-4.30 (m, 2H), 3.92 (d, *J* = 12.2 Hz, 1H), 1.49 (s, 9H), 1.46 (s, 9H), 1.42 (s, 9H), 1.37 (s, 9H).

<sup>13</sup>C NMR (126 MHz, CDCl<sub>3</sub>) (all signals represent 1C except as noted) δ 151.46, 150.74, 149.70, 149.36, 149.05, 148.56, 148.09, 148.01, 147.87 (2C), 147.54 (2C), 147.51, 147.36, 147.23, 147.18, 147.10, 147.06, 147.01 (2C), 146.91, 146.60, 146.55, 146.46 (2C), 146.32, 146.16, 145.84, 145.52 (2C), 145.49, 145.16, 144.44, 144.43, 144.13 (2C), 144.11, 143.47, 143.38, 143.32, 143.30, 142.55, 142.27, 141.41, 140.58, 139.55, 138.86, 136.97, 136.92, 136.57, 133.30, 132.82, 130.43, 129.59, 123.53 (q, *J* = 277.7 Hz, CF<sub>3</sub>), 90.58 (1C, sp<sup>3</sup>), 88.60 (1C, sp<sup>3</sup>), 85.51 (1C, sp<sup>3</sup>), 82.73 (1C, sp<sup>3</sup>),

82.12 (C(CH<sub>3</sub>)<sub>3</sub>), 81.83 (1C, sp<sup>3</sup>), 81.56 (C(CH<sub>3</sub>)<sub>3</sub>), 81.52 (C(CH<sub>3</sub>)<sub>3</sub>), 81.37 (C(CH<sub>3</sub>)<sub>3</sub>), 62.00 (q, *J* = 36.7 Hz, CH<sub>2</sub>), 31.59 (1C), 26.83 (3C), 26.81 (3C), 26.77 (3C), 26.63 (3C).

ESI-FT-ICR-HRMS-Positive C<sub>78</sub>H<sub>41</sub>F<sub>3</sub>NO<sub>9</sub> (M + H<sup>+</sup>) calculated 1192.2728, found 1192.2735; C<sub>78</sub>H<sub>44</sub>F<sub>3</sub>N<sub>2</sub>O<sub>9</sub> (M + NH<sub>4</sub><sup>+</sup>) calculated 1209.2993, found 1209.2992.

### Preparation of Compounds 13 and 14:

To a solution of the compound **8** and **9** (58 mg, ratio= 3:1, **8**: 0.039mmol, **9**: 0.013mmol) in 11 mL freshly distilled toluene was added BBr<sub>3</sub> (0.05 mL). The mixture was stirred for about 10 minutes at room temperature followed by adding 12 mL toluene. Then the solution was quenched by water and the organic layer was mixed with PPh<sub>3</sub> (100 mg, 0.38 mmol). The solution was stirred at room temperature for 5 minutes and then first purified by silica gel column chromatography eluting with toluene. The crude product was further purified by silica gel column chromatography eluting with CS<sub>2</sub> to give the first brown band as compound **14** (4.6 mg, 0.006 mmol, 46%), and with toluene to give the second brown band as compound **13** (6.2 mg, 0.008 mmol, 21%).

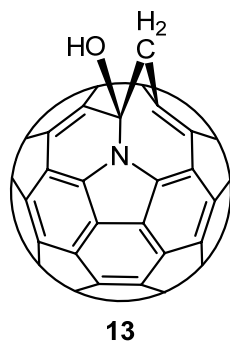

### Characterization data for 13:

<sup>1</sup>H NMR (500 MHz, CS<sub>2</sub>/CDCl<sub>3</sub>) δ 5.73 (d, *J* = 12.4 Hz, 1H), 5.30 (d, *J* = 12.4 Hz, 1H), 4.51 (s, 1H).

<sup>13</sup>C NMR (126 MHz, CS<sub>2</sub>/1,4-Dioxane-d<sub>8</sub>) (all signals represent 1C except as noted) δ 149.34, 149.23, 149.15, 148.91 (2C), 147.44, 147.42, 147.41, 147.12, 146.78, 146.71, 146.61, 146.46, 146.33, 146.27, 146.20 (2C), 146.10, 146.07, 145.91, 145.84, 145.82, 145.58, 145.23, 145.17, 145.08, 144.32, 144.12, 143.95, 143.82, 143.51, 143.49, 142.97, 142.83, 142.69, 142.67, 142.51, 142.45, 142.39, 142.35, 141.95, 141.56, 140.15, 140.11, 140.06, 139.87, 139.22, 138.92, 138.06, 135.92, 135.63, 134.95, 134.64, 134.16, 134.10, 130.76, 128.75, 126.75, 88.65 (1C, sp<sup>3</sup>), 40.47 (1C).

ESI-FT-ICR-HRMS-Positive C<sub>60</sub>H<sub>4</sub>NO (M + H<sup>+</sup>) calculated 754.0287, found 754.0299.

MALDI-TOF-MS C<sub>60</sub>H<sub>3</sub>NO calculated 753.0, found 753.2.



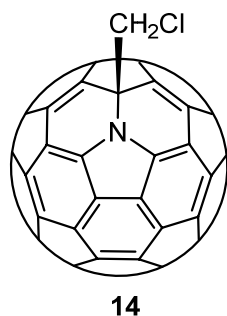

**Characterization data for 14:**

$^1\text{H}$  NMR (500 MHz,  $\text{CS}_2/\text{CDCl}_3$ )  $\delta$  5.64 (s, 2H).

$^{13}\text{C}$  NMR (126 MHz,  $\text{CS}_2/\text{CDCl}_3$ ) (all signals represent 2C except as noted)  $\delta$  154.81, 147.56 (1C), 147.33, 147.29, 147.27, 147.09, 146.44, 146.40, 146.10 (4C), 145.68 (3C), 145.64, 144.94, 144.74, 144.42, 144.18, 143.82, 143.09, 142.71, 142.02, 141.70, 141.38, 140.99, 140.86, 140.65, 139.65, 137.42, 134.52, 123.95, 81.71 (1C,  $\text{sp}^3$ ), 53.01 (1C).

ESI-FT-ICR-HRMS-Positive  $\text{C}_{60}\text{H}_2\text{ClN}$  ( $\text{M} - \text{e}^-$ ) calculated 770.9870, found 770.9871.

MALDI-TOF-MS  $\text{C}_{60}\text{H}_2\text{N}$  ( $\text{M} - \text{Cl}^-$ ) calculated 736.0, found 736.1.

**Preparation of Compound 15:**

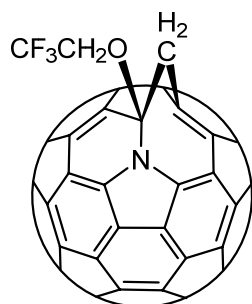

To a solution of the compound **12c** (34 mg, 0.029 mmol) in 7 mL freshly distilled toluene was added  $\text{BBr}_3$  (0.05 mL). The mixture was stirred for about 10 minutes at room temperature followed by adding 7 mL toluene. Then the solution was quenched by water and the organic layer was mixed with  $\text{PPh}_3$  (100 mg, 0.38 mmol). The solution was stirred at room temperature for 5 minutes and then first purified by silica gel column chromatography eluting with toluene. The crude product was further purified by silica gel column chromatography eluting with  $\text{CS}_2$  to give the brown band as compound **15** (6 mg, 0.007 mmol, 24%)

**Characterization data for 15:**

$^1\text{H}$  NMR (500 MHz,  $\text{CS}_2/\text{CDCl}_3$ )  $\delta$  5.65 (d,  $J = 12.1$  Hz, 1H), 5.22 (d,  $J = 12.1$  Hz, 1H), 4.81-4.96 (m, 2H).

$^{13}\text{C}$  NMR (126 MHz,  $\text{CS}_2/\text{CDCl}_3$ ) (all signals represent 1C except as noted)  $\delta$  148.25, 148.07, 148.02, 147.86, 147.40, 146.54, 146.49, 146.43, 145.99, 145.97, 145.87, 145.60, 145.55, 145.50 (2C), 145.32, 145.29, 145.25, 145.10, 145.02, 144.88, 144.85, 144.49, 144.41, 144.28, 143.52, 143.37, 143.16, 142.99, 142.96, 142.74, 142.26, 142.02, 141.86, 141.73, 141.68, 141.56, 141.18, 140.98, 140.29, 140.14, 139.43,

139.32, 138.67, 138.28, 138.21, 137.57, 135.45, 135.29, 134.81, 133.96, 133.87, 133.66, 133.56, 130.92, 128.53, 128.39, 126.04, 123.30 (q,  $J = 278.2$  Hz,  $\text{CF}_3$ ), 91.82 (1C,  $\text{sp}^3$ ), 62.36 (q,  $J = 35.8$  Hz,  $\text{CH}_2$ ), 35.17 (1C).  
MALDI-TOF-MS  $\text{C}_{62}\text{H}_5\text{ONF}_3$  ( $\text{M} + \text{H}^+$ ) calculated 836.0, found 836.1.

### Preparation of Compound 16:

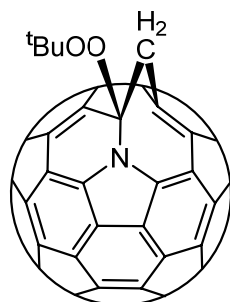

To a solution of the compound **8** and **9** (119 mg, ratio= 20:1, **8**: 0.101 mmol) in 24 mL freshly distilled toluene was added  $\text{BBr}_3$  (0.14 mL). The mixture was stirred for about 10 minutes at room temperature followed by adding 24 mL toluene. Then the solution was quenched by water and the organic layer was mixed with  $\text{PPh}_3$  (100 mg, 0.38 mmol). The solution was stirred at room temperature for 5 minutes and then *t*-butyl hydroperoxide (70%, 1.5 ml) was added. The resulting solution was stirred at room temperature for 5 minutes and then first purified by silica gel column chromatography eluting with toluene. The crude product was further purified by silica gel column chromatography eluting with  $\text{CS}_2$  to give an inseparable mixture of compound **16** and **14** (9.8 mg, 0.012 mmol, 12%).

### Characterization data for 16:

$^1\text{H}$  NMR (500 MHz,  $\text{CS}_2/\text{CDCl}_3$ )  $\delta$  5.62 (q,  $J = 12.6$  Hz, 1H), 1.67 (s, 9H).

$^{13}\text{C}$  NMR (126 MHz,  $\text{CS}_2/\text{CDCl}_3$ ) (all signals represent 1C except as noted)  $\delta$  148.48, 148.35, 148.01, 147.97, 147.92, 146.61 (2C), 146.50, 146.48, 145.82, 145.62 (2C), 145.56, 145.39, 145.33, 145.29, 145.28 (2C), 145.26, 145.02, 144.94, 144.90, 144.81, 144.35, 144.22, 144.16, 143.42, 143.18, 143.03, 142.84, 142.65, 142.59, 142.05, 142.01, 141.80 (2C), 141.54, 141.51, 141.48, 141.13, 140.74, 140.53, 139.32, 139.22, 139.09, 138.03, 137.92, 137.22, 135.79, 135.12, 134.26, 133.85, 133.48, 133.34, 133.29, 129.73, 127.60, 126.21, 94.50 (1C,  $\text{sp}^3$ ), 81.46 ( $\text{C}(\text{CH}_3)_3$ ), 35.70 (1C), 26.86 (3C).

ESI-FT-ICR-HRMS-Positive  $\text{C}_{64}\text{H}_{12}\text{NO}_2$  ( $\text{M} + \text{H}^+$ ) calculated 826.0863, found 826.0855.

MALDI-TOF-MS  $\text{C}_{60}\text{H}_2\text{NO}$  ( $\text{M} - \text{tBuO}^-$ ) calculated 752.0136, found 751.9977.

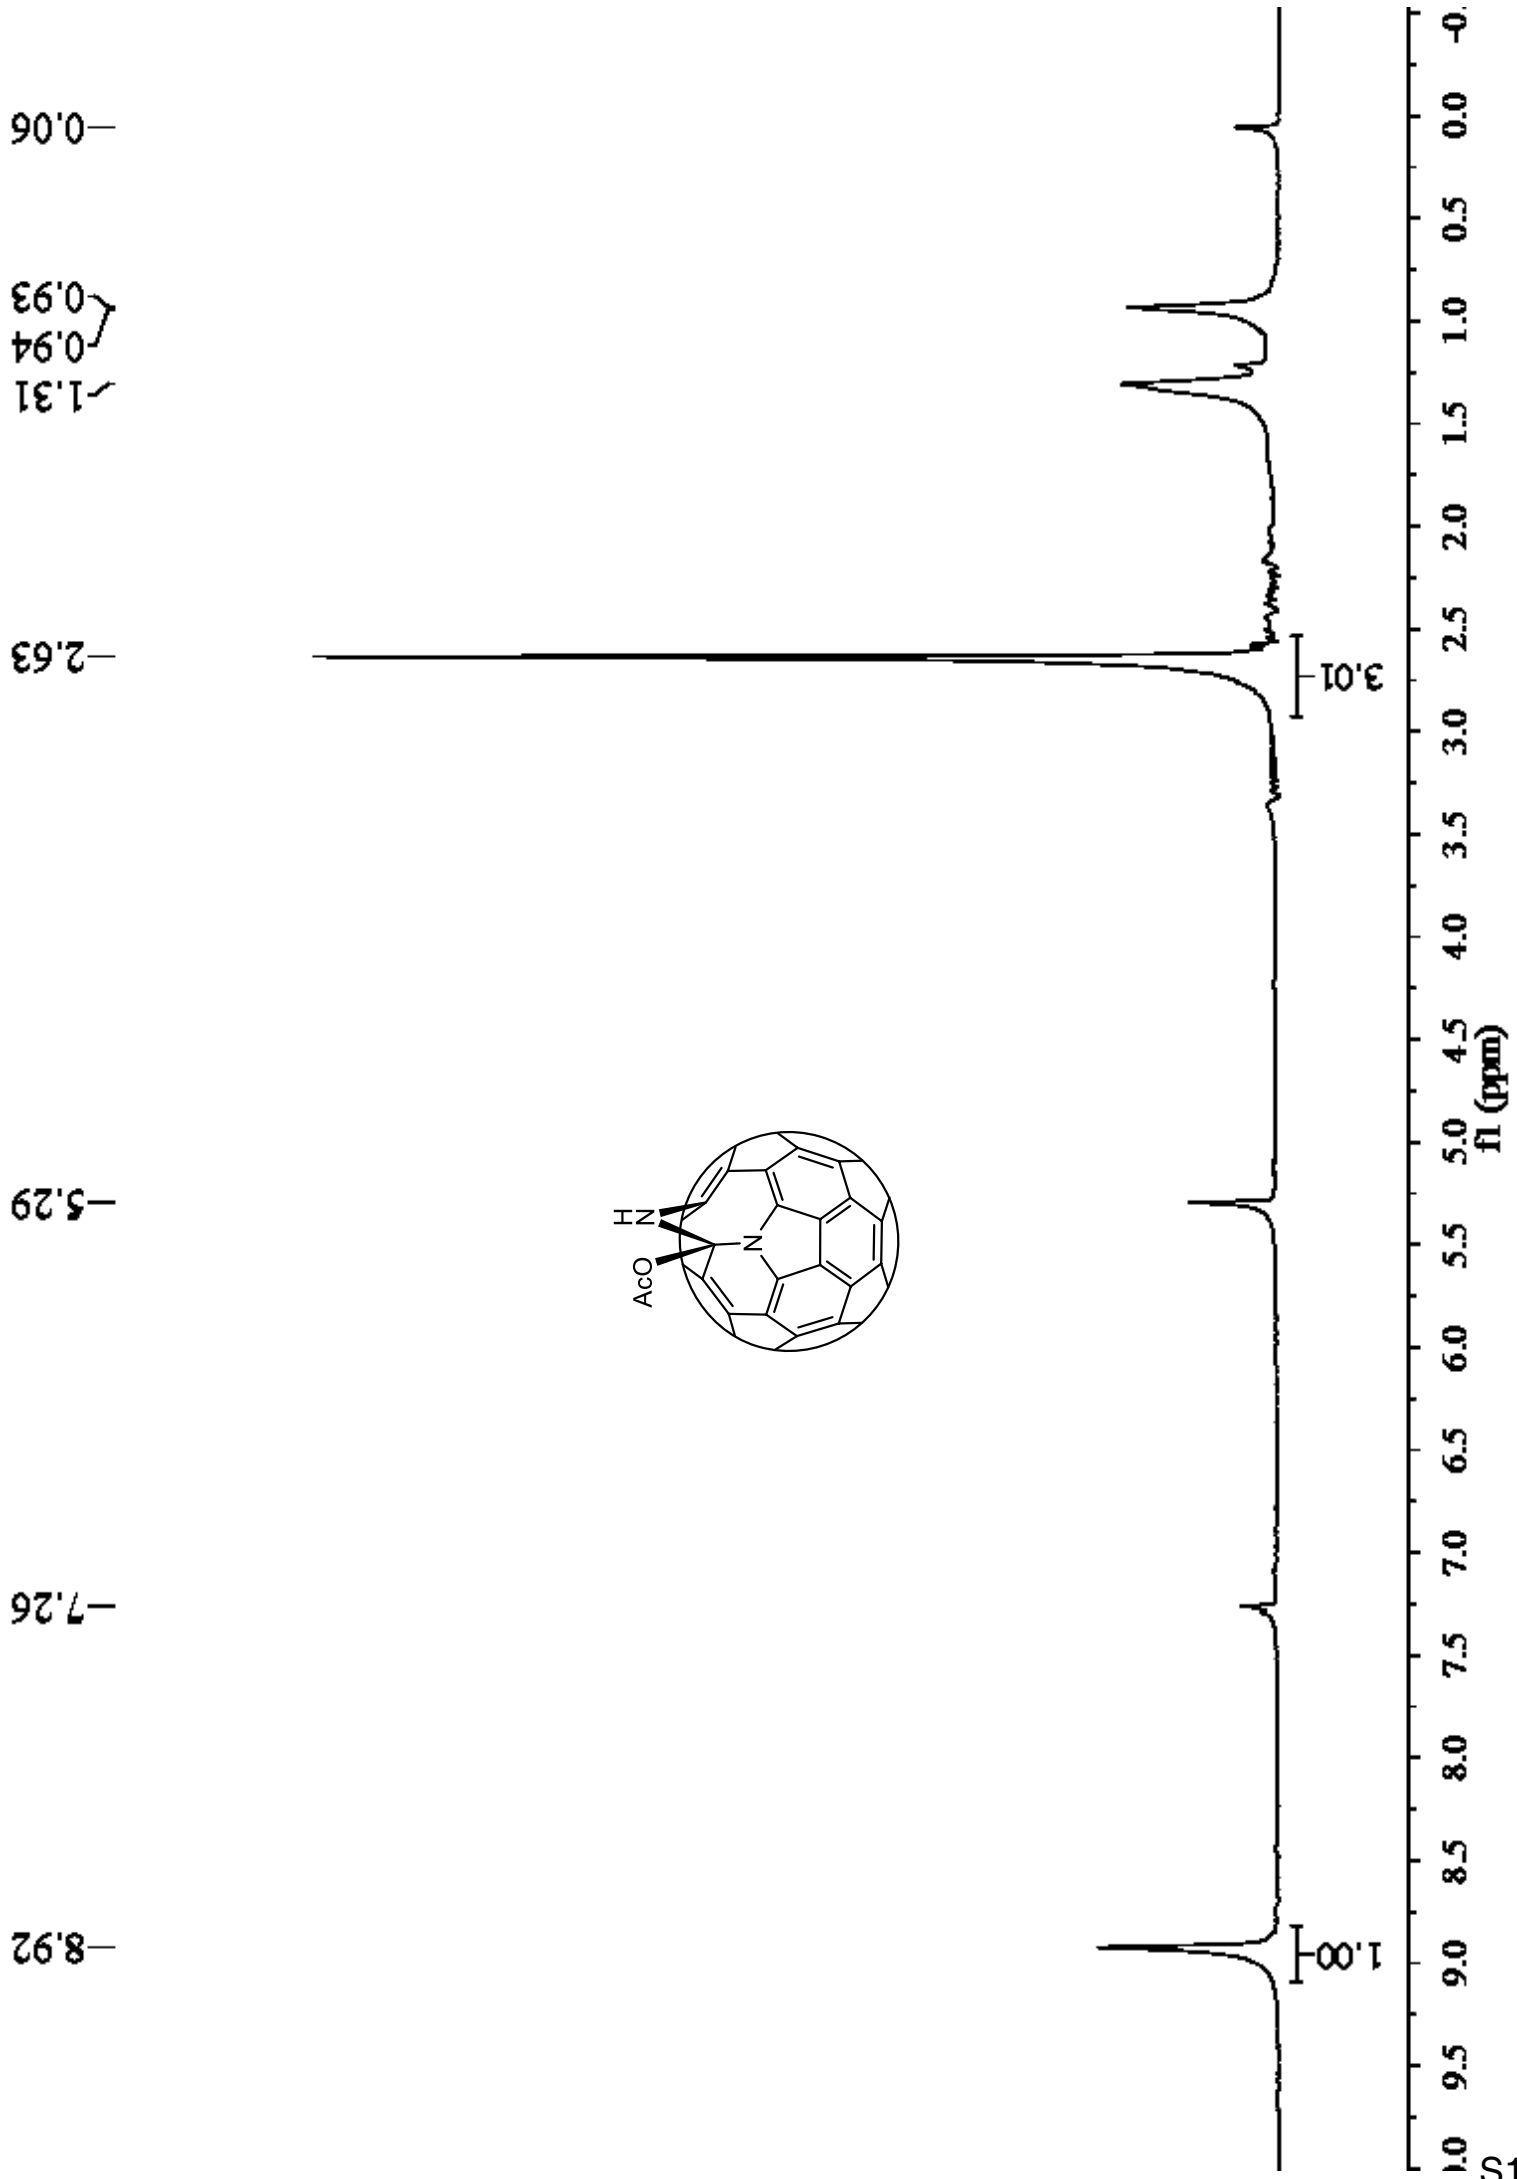

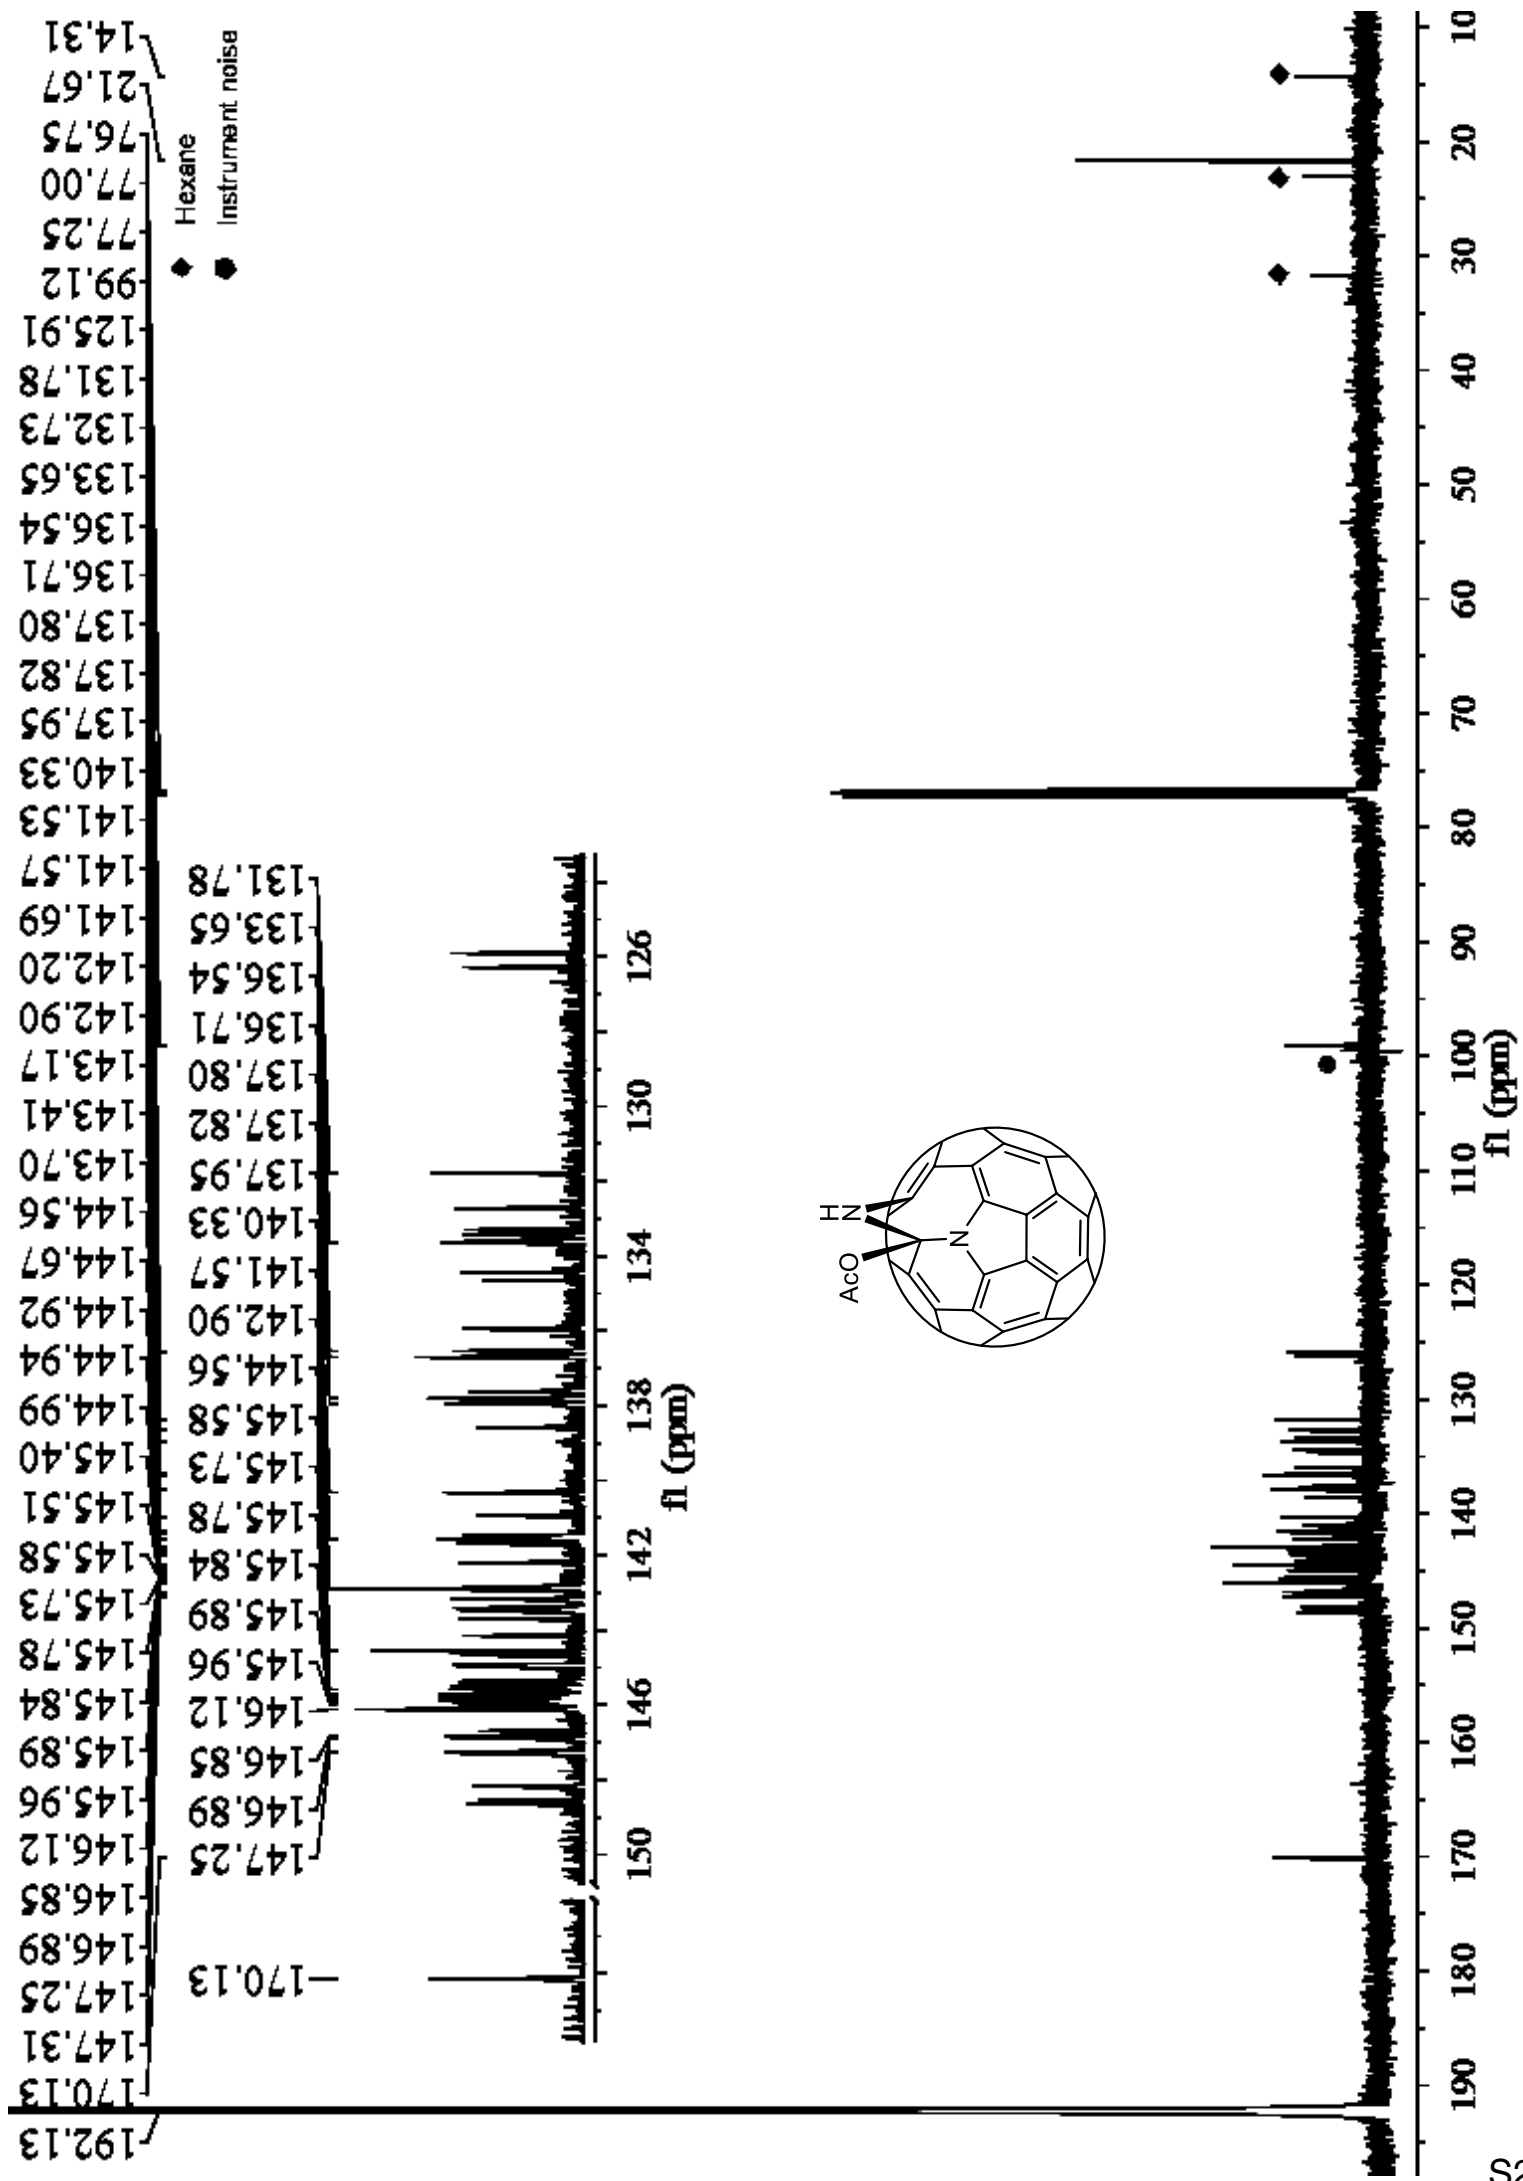

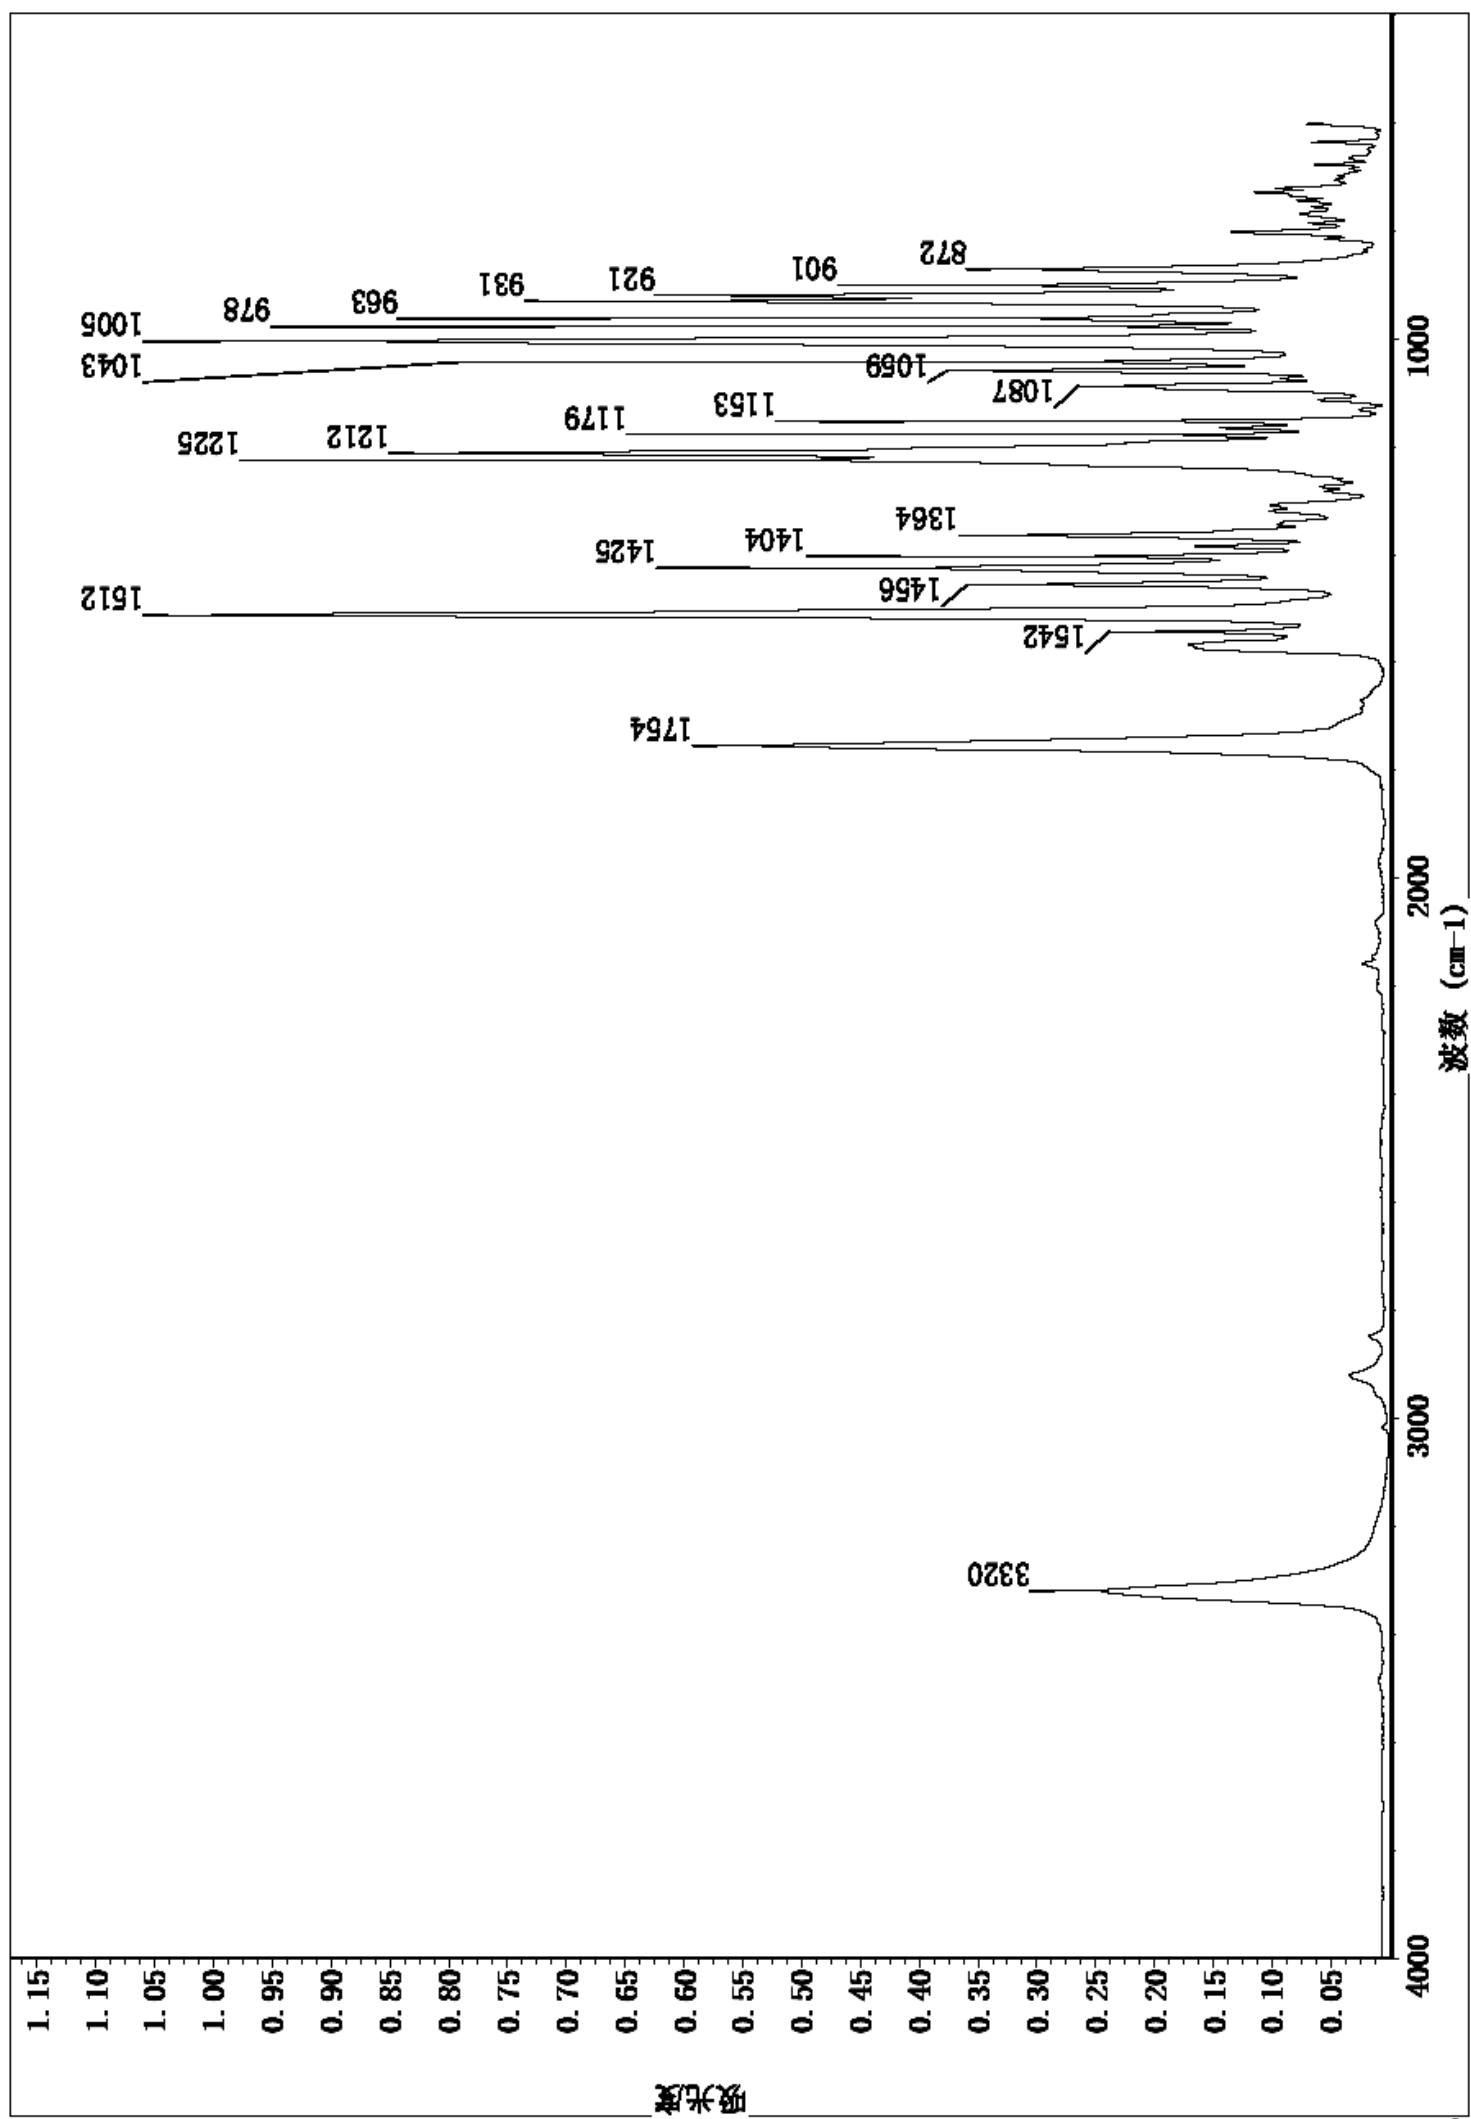

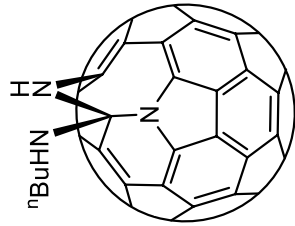

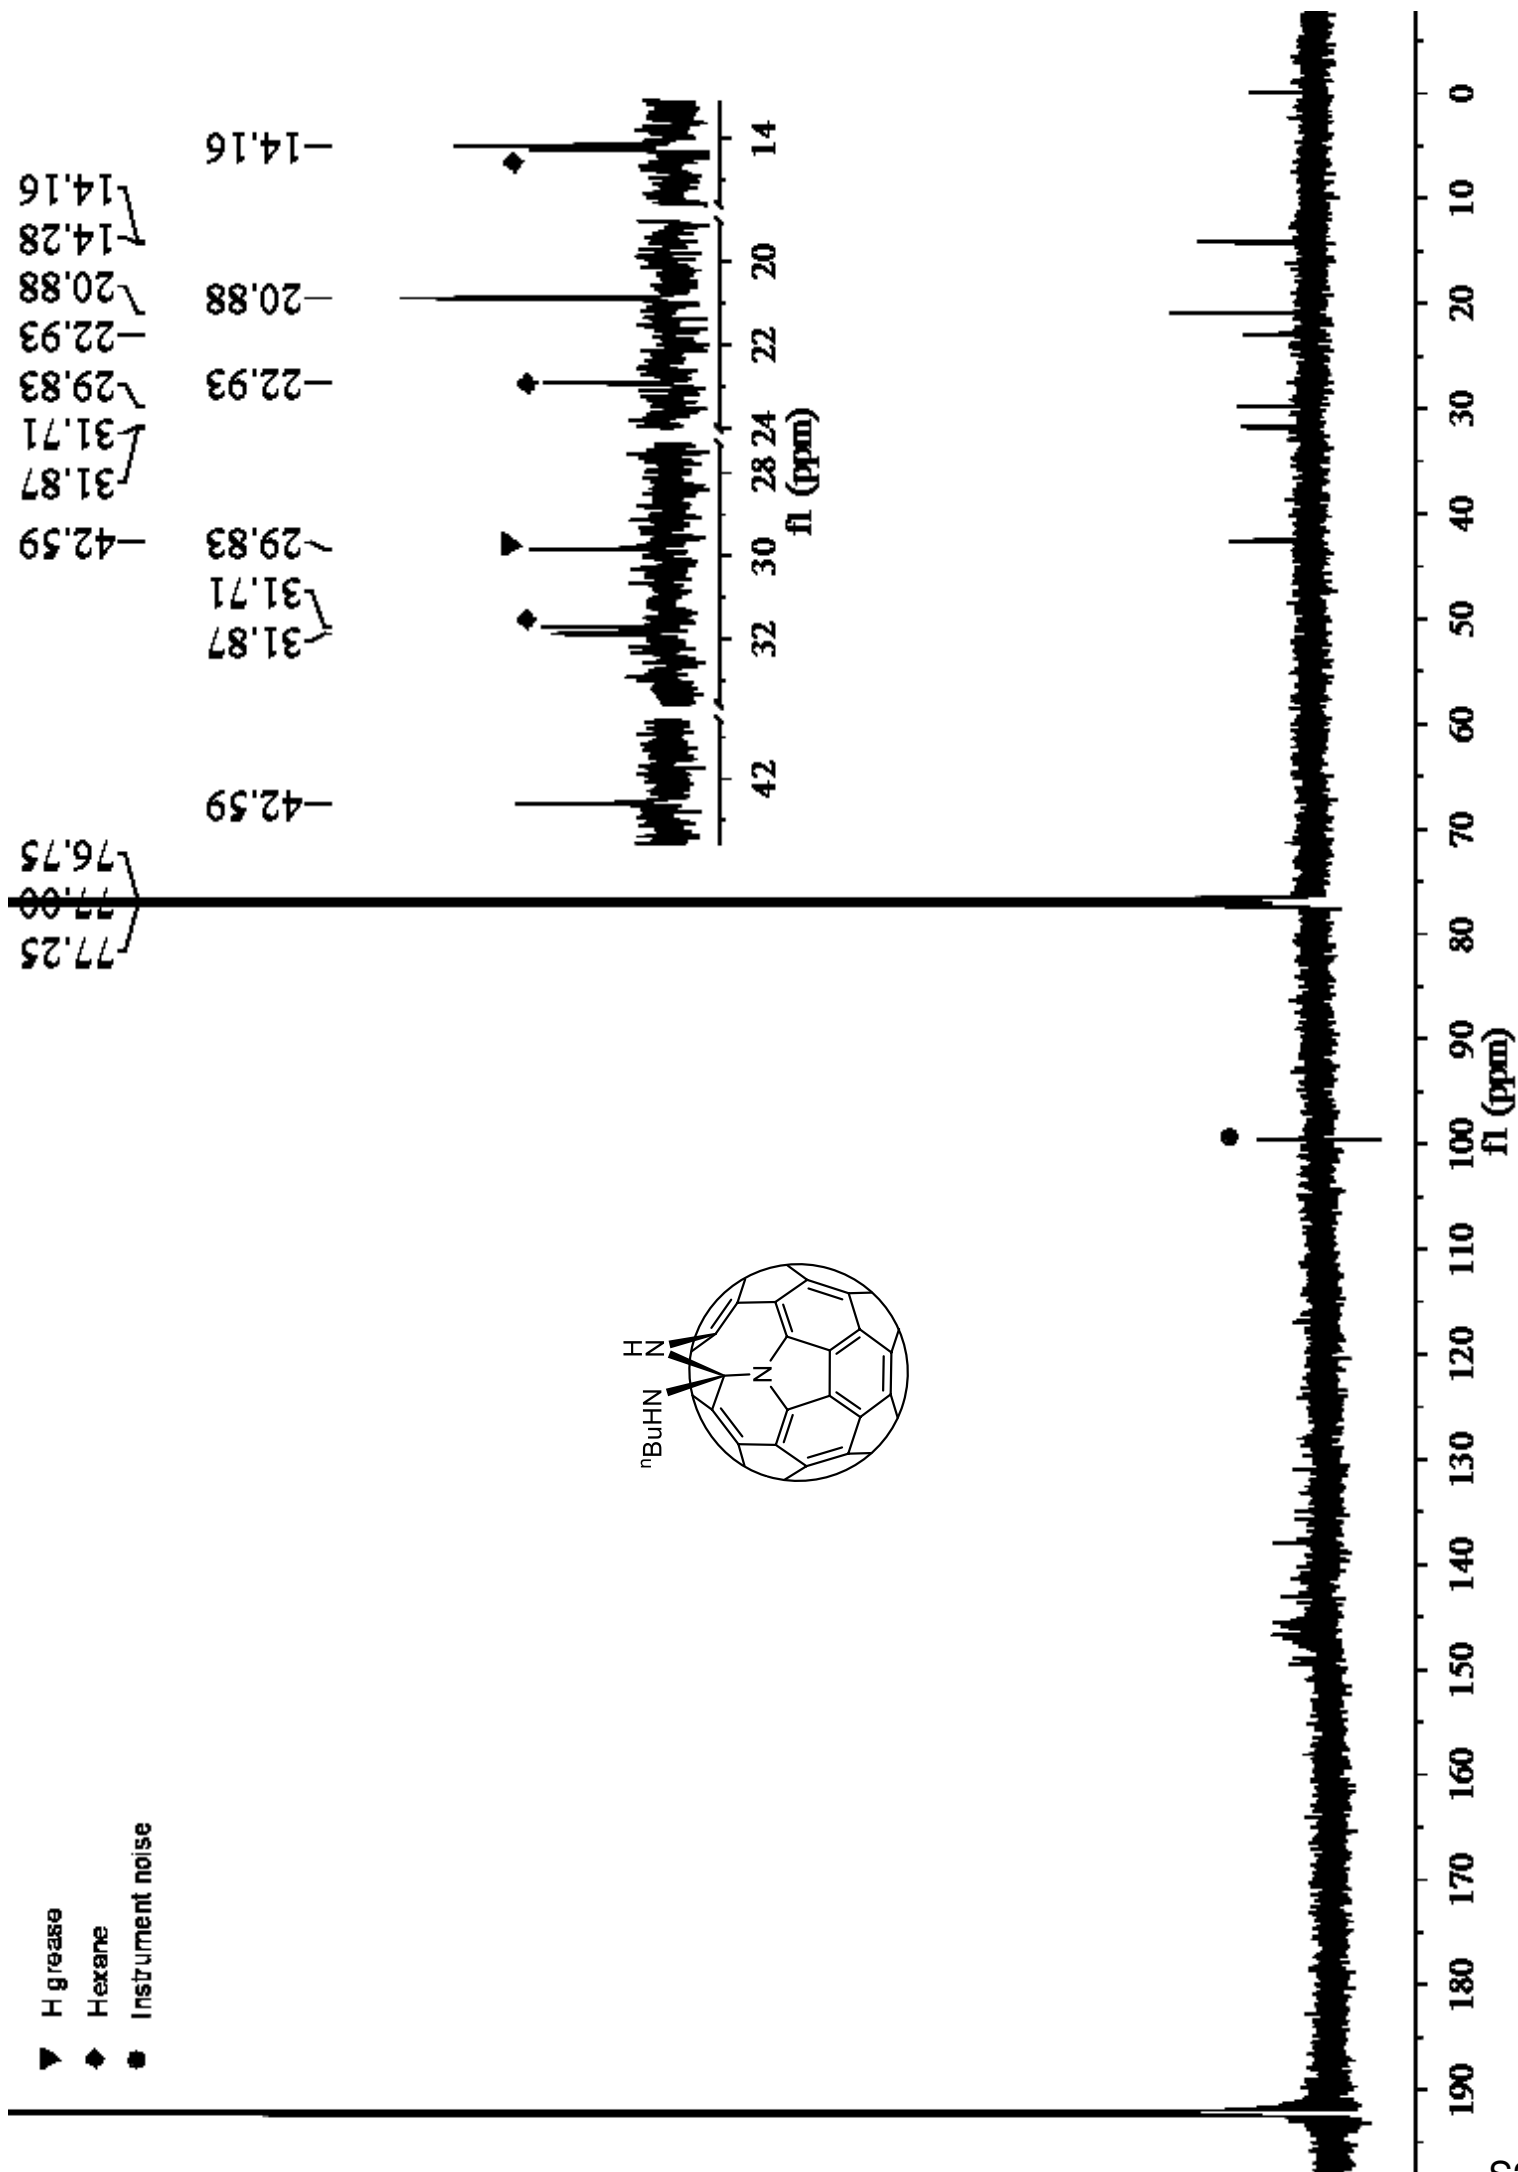

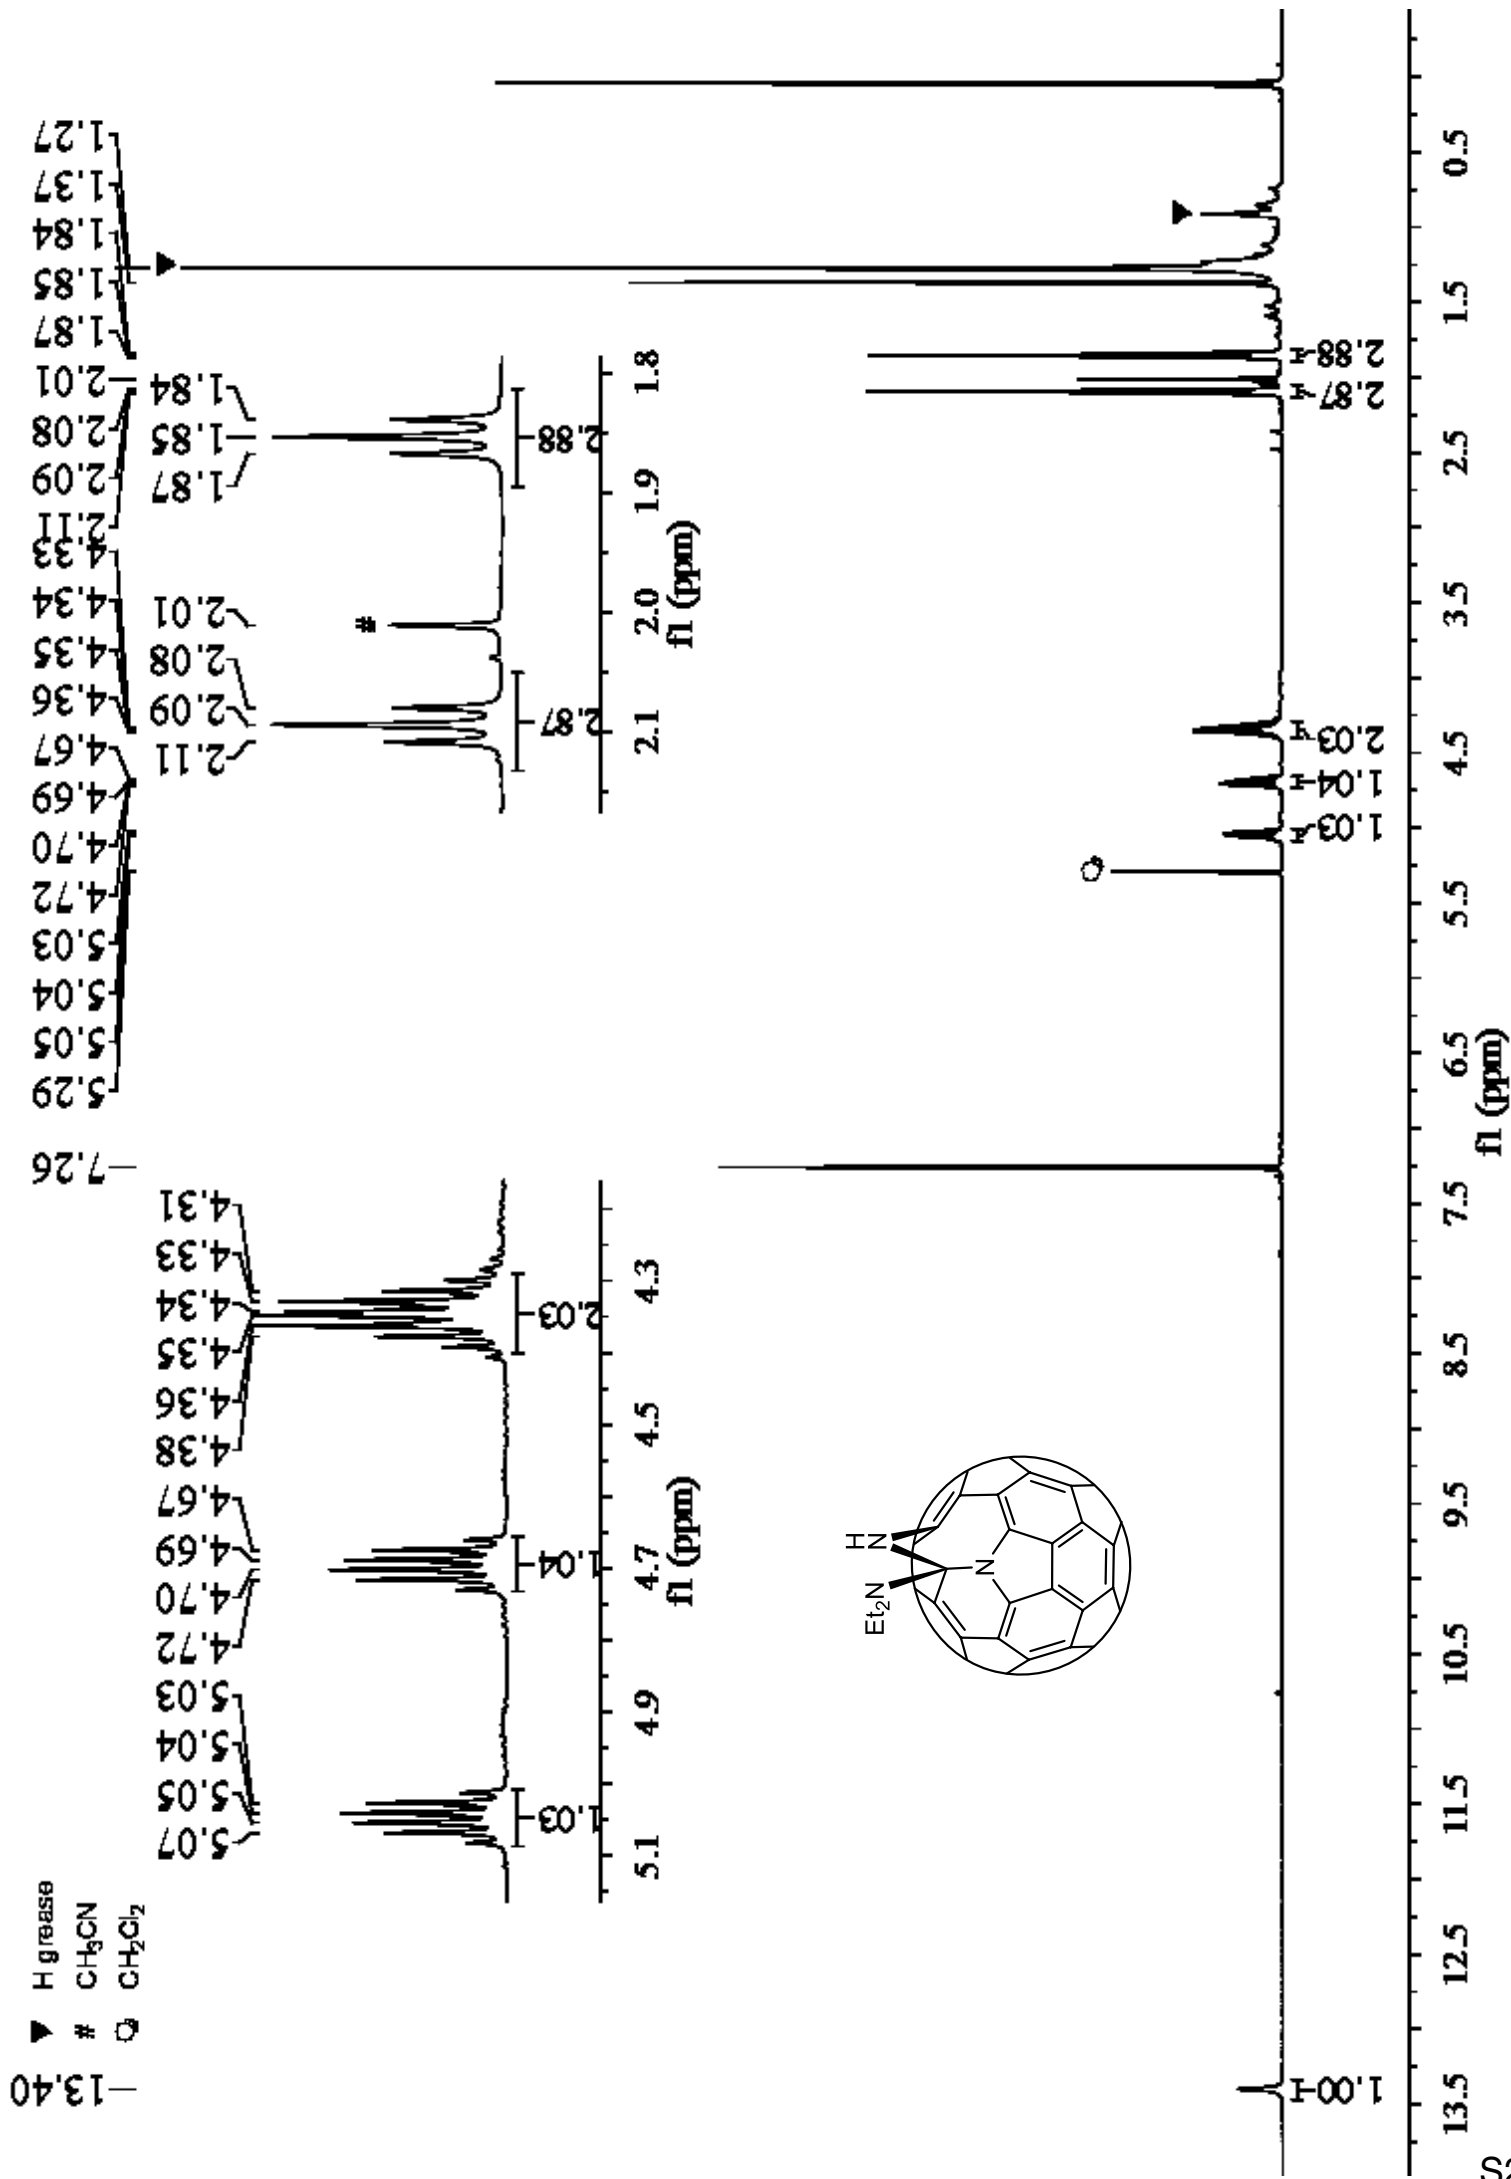



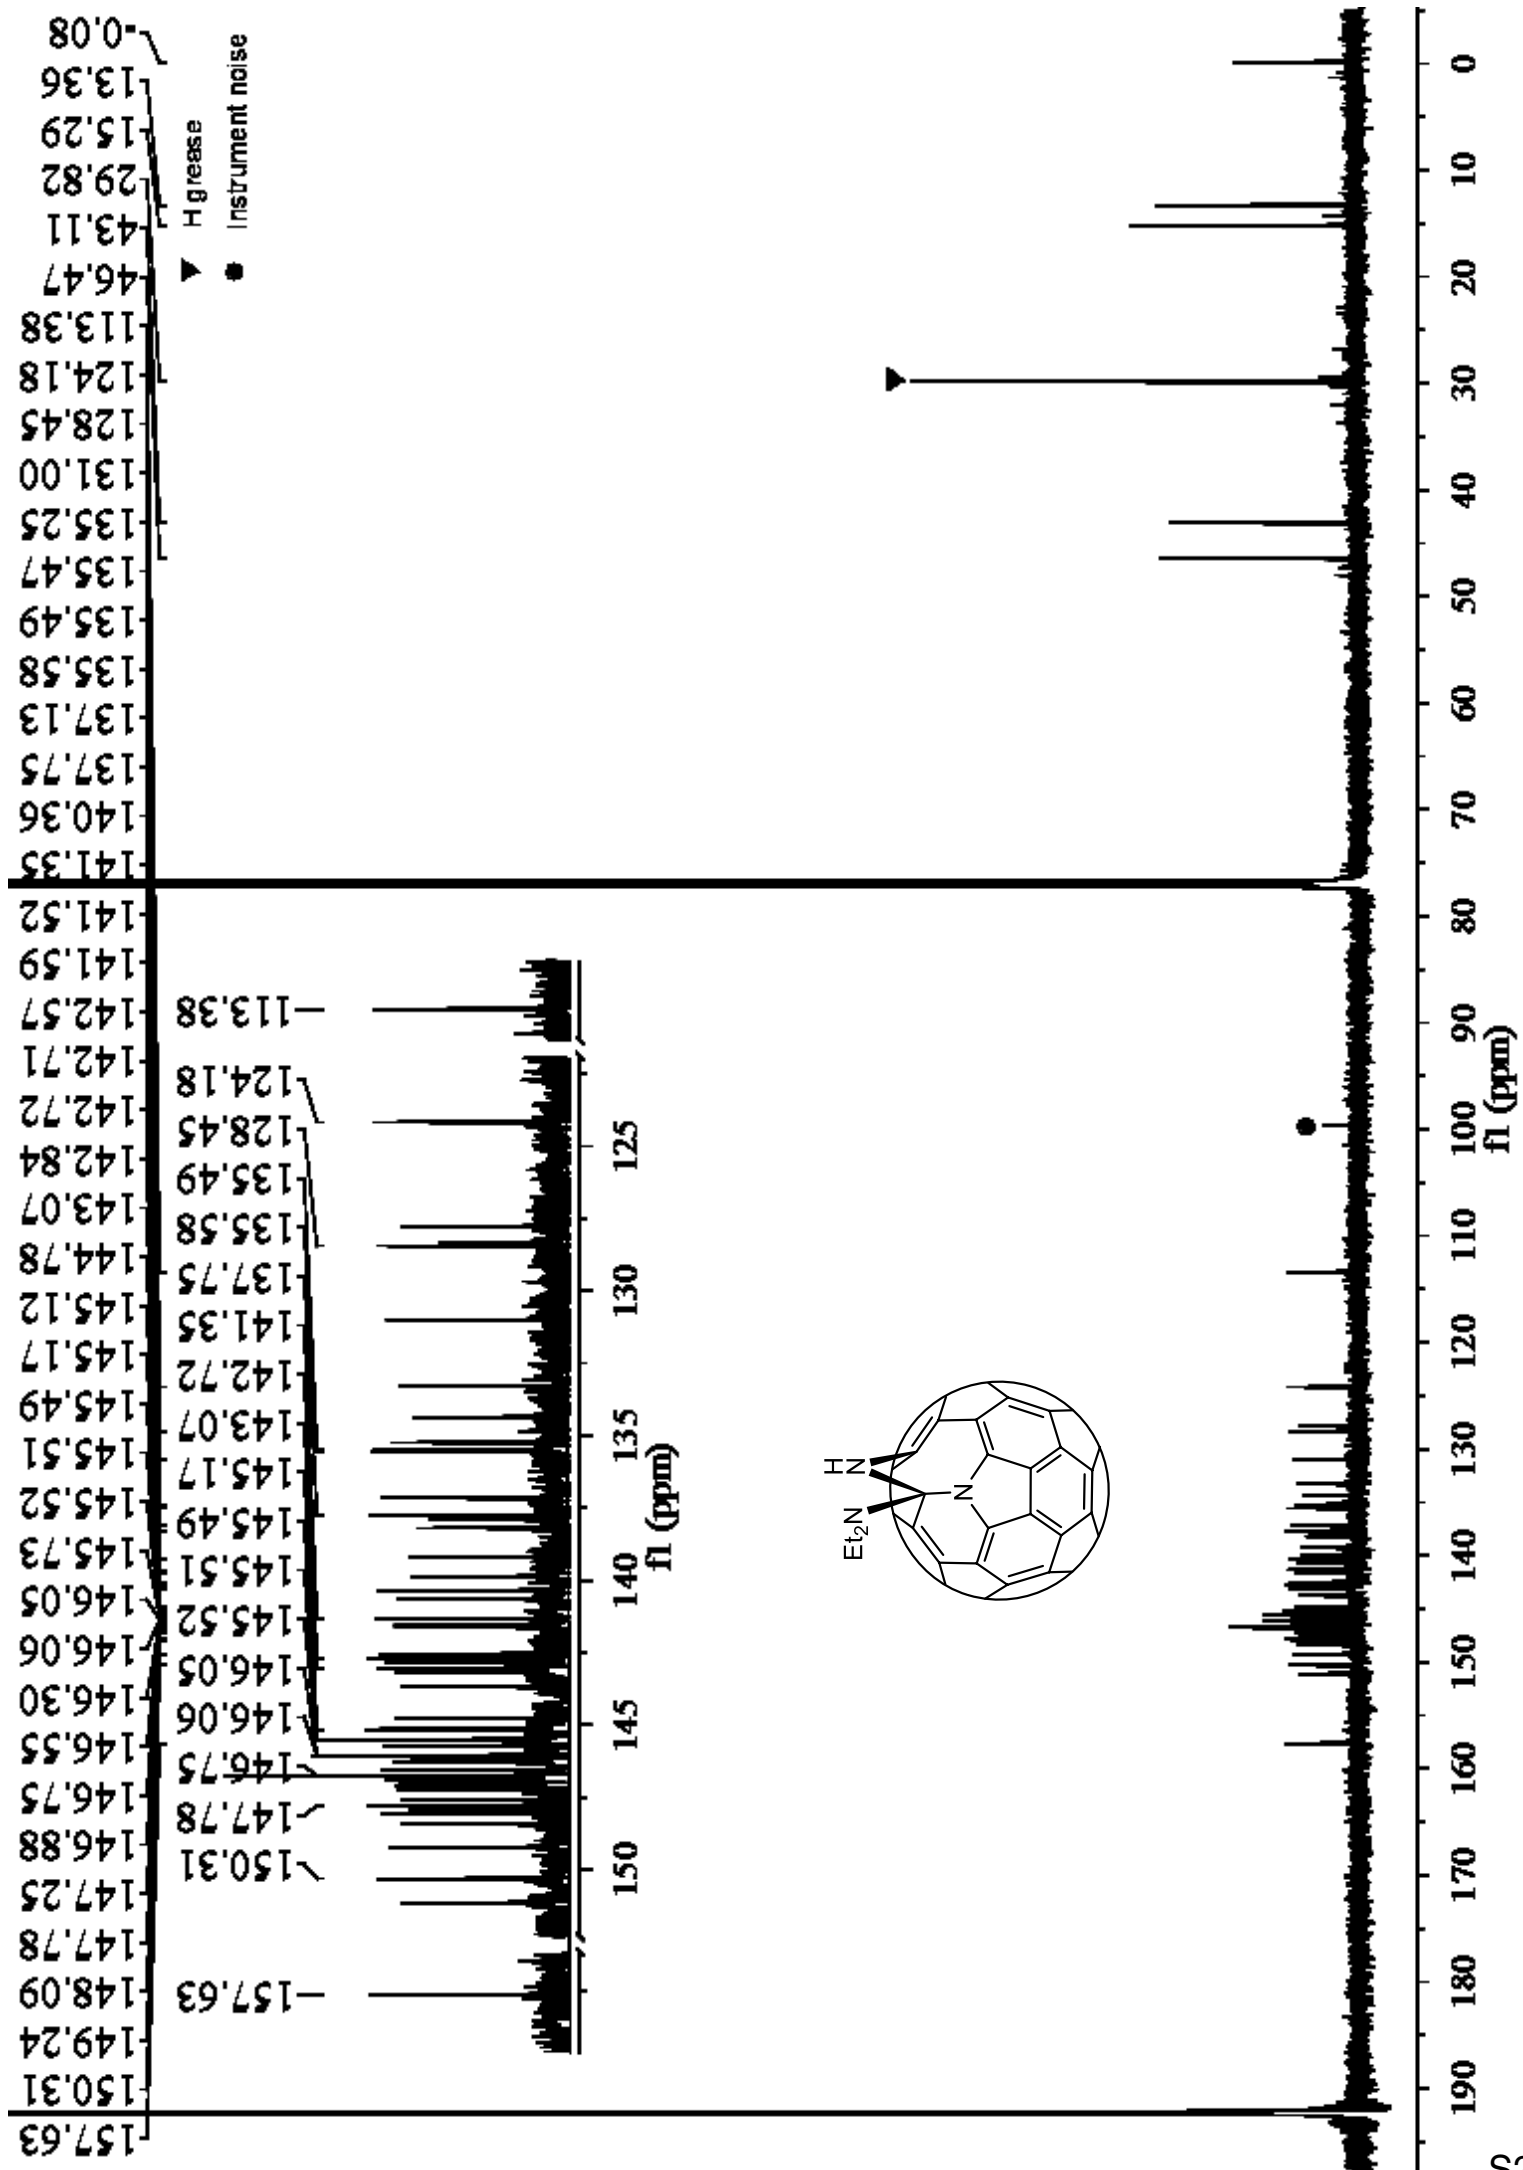

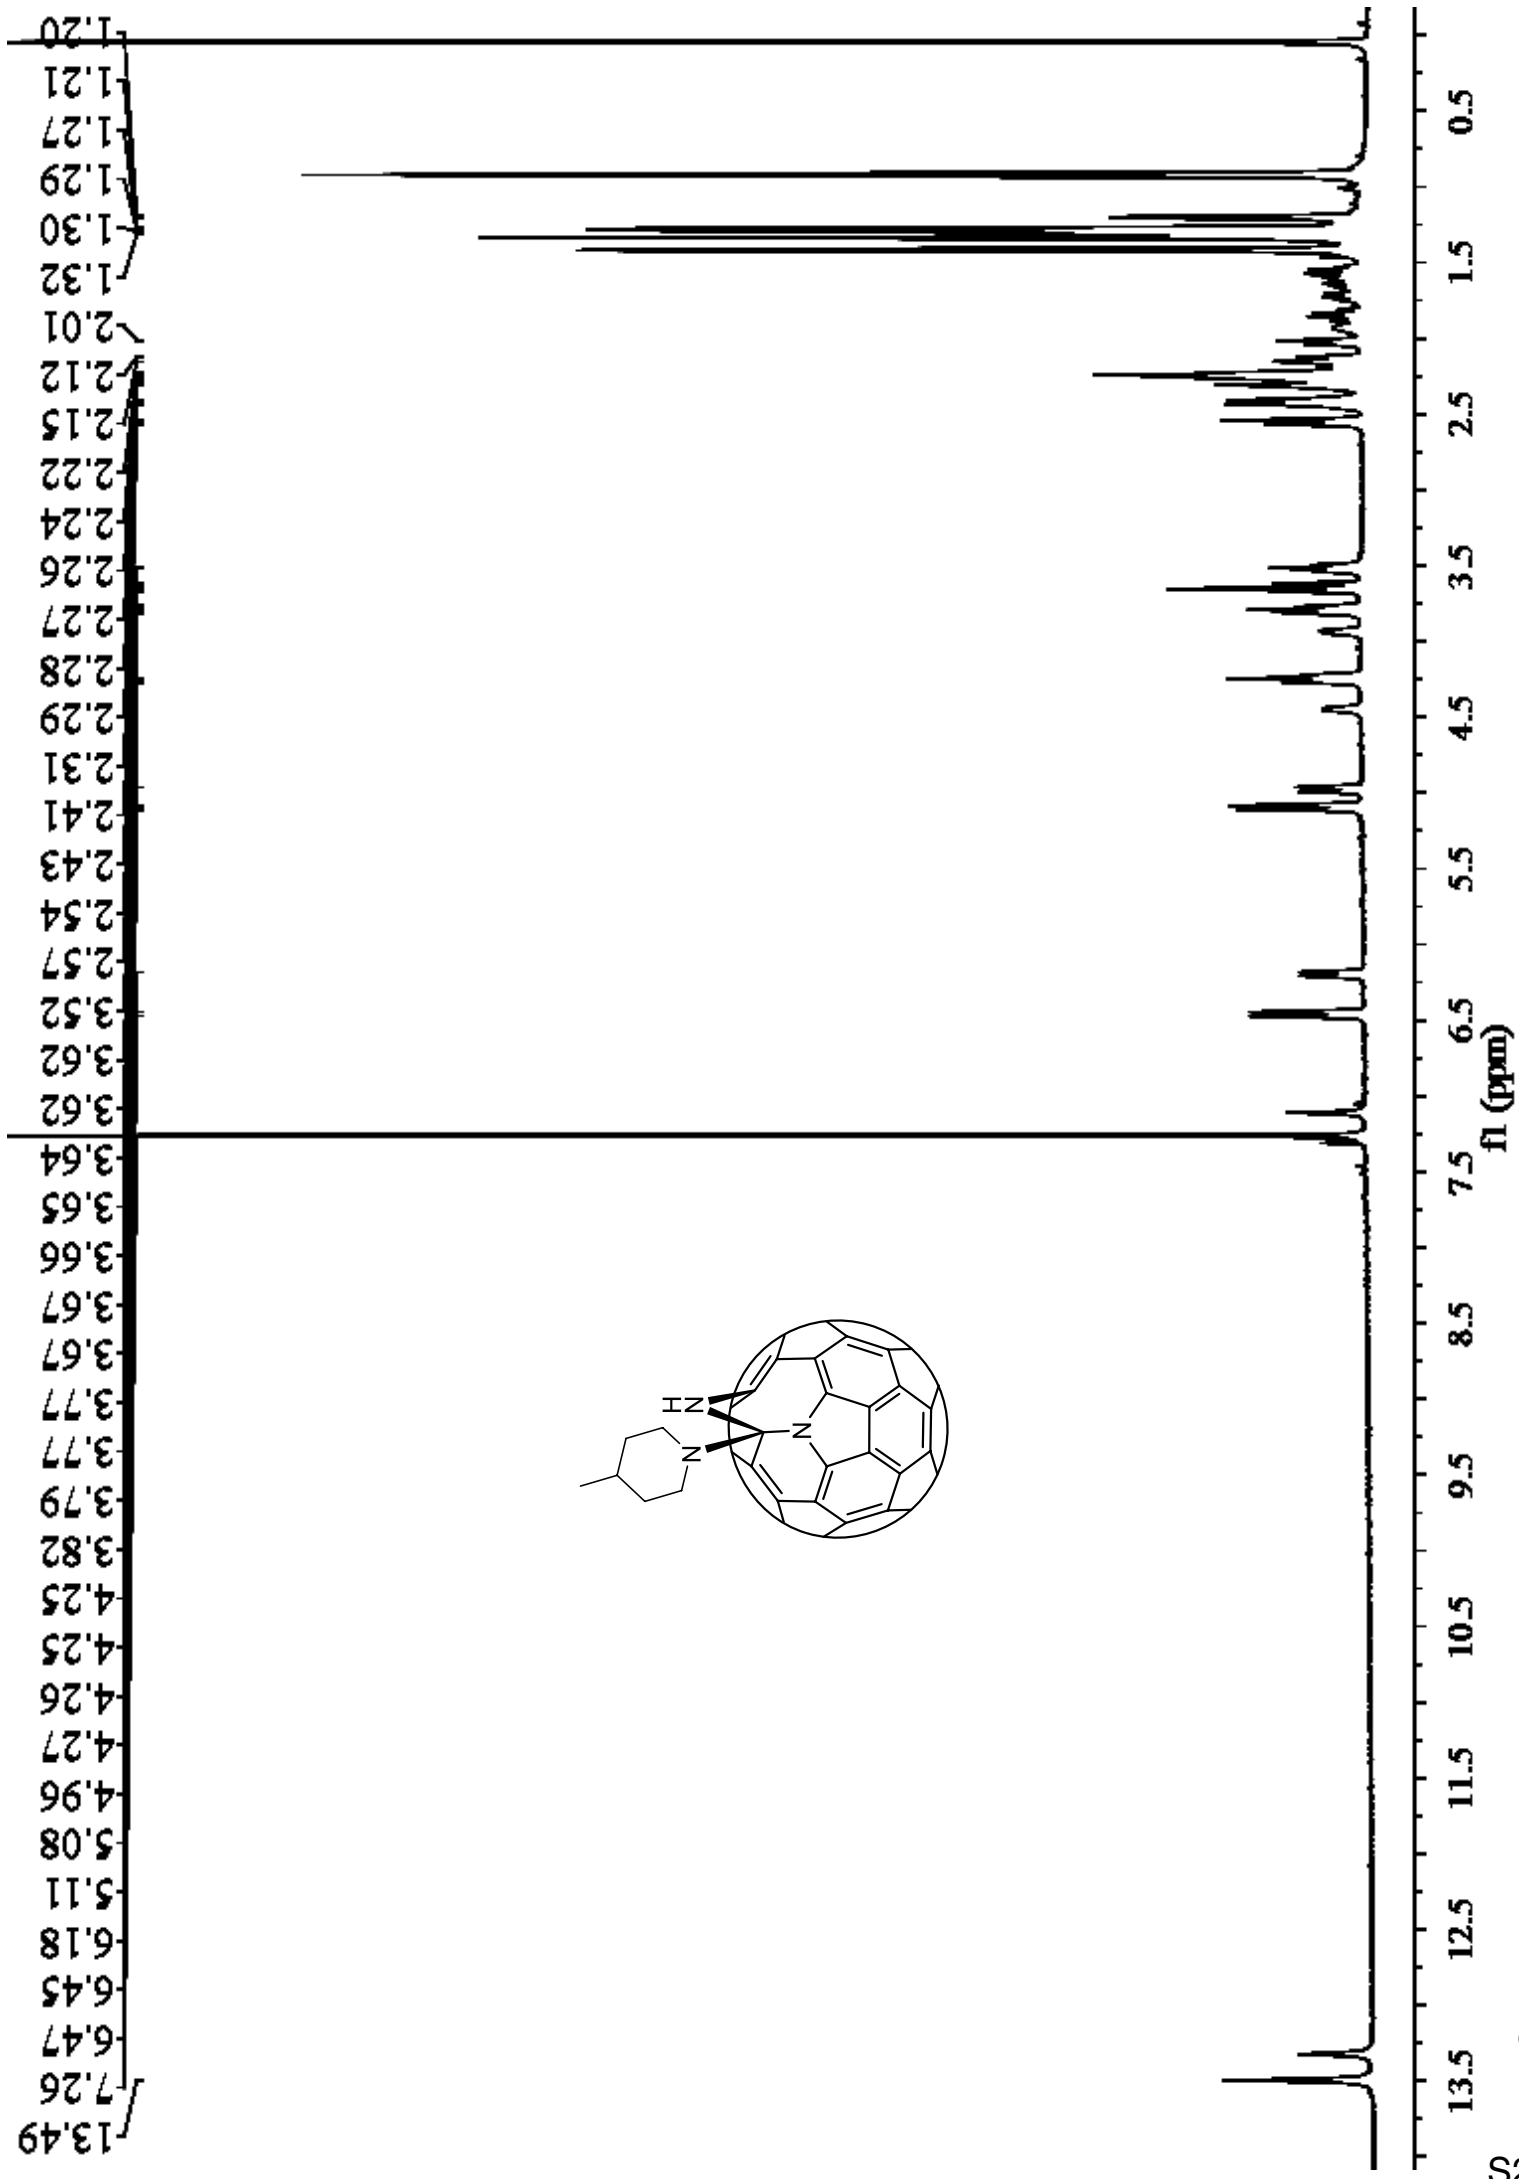

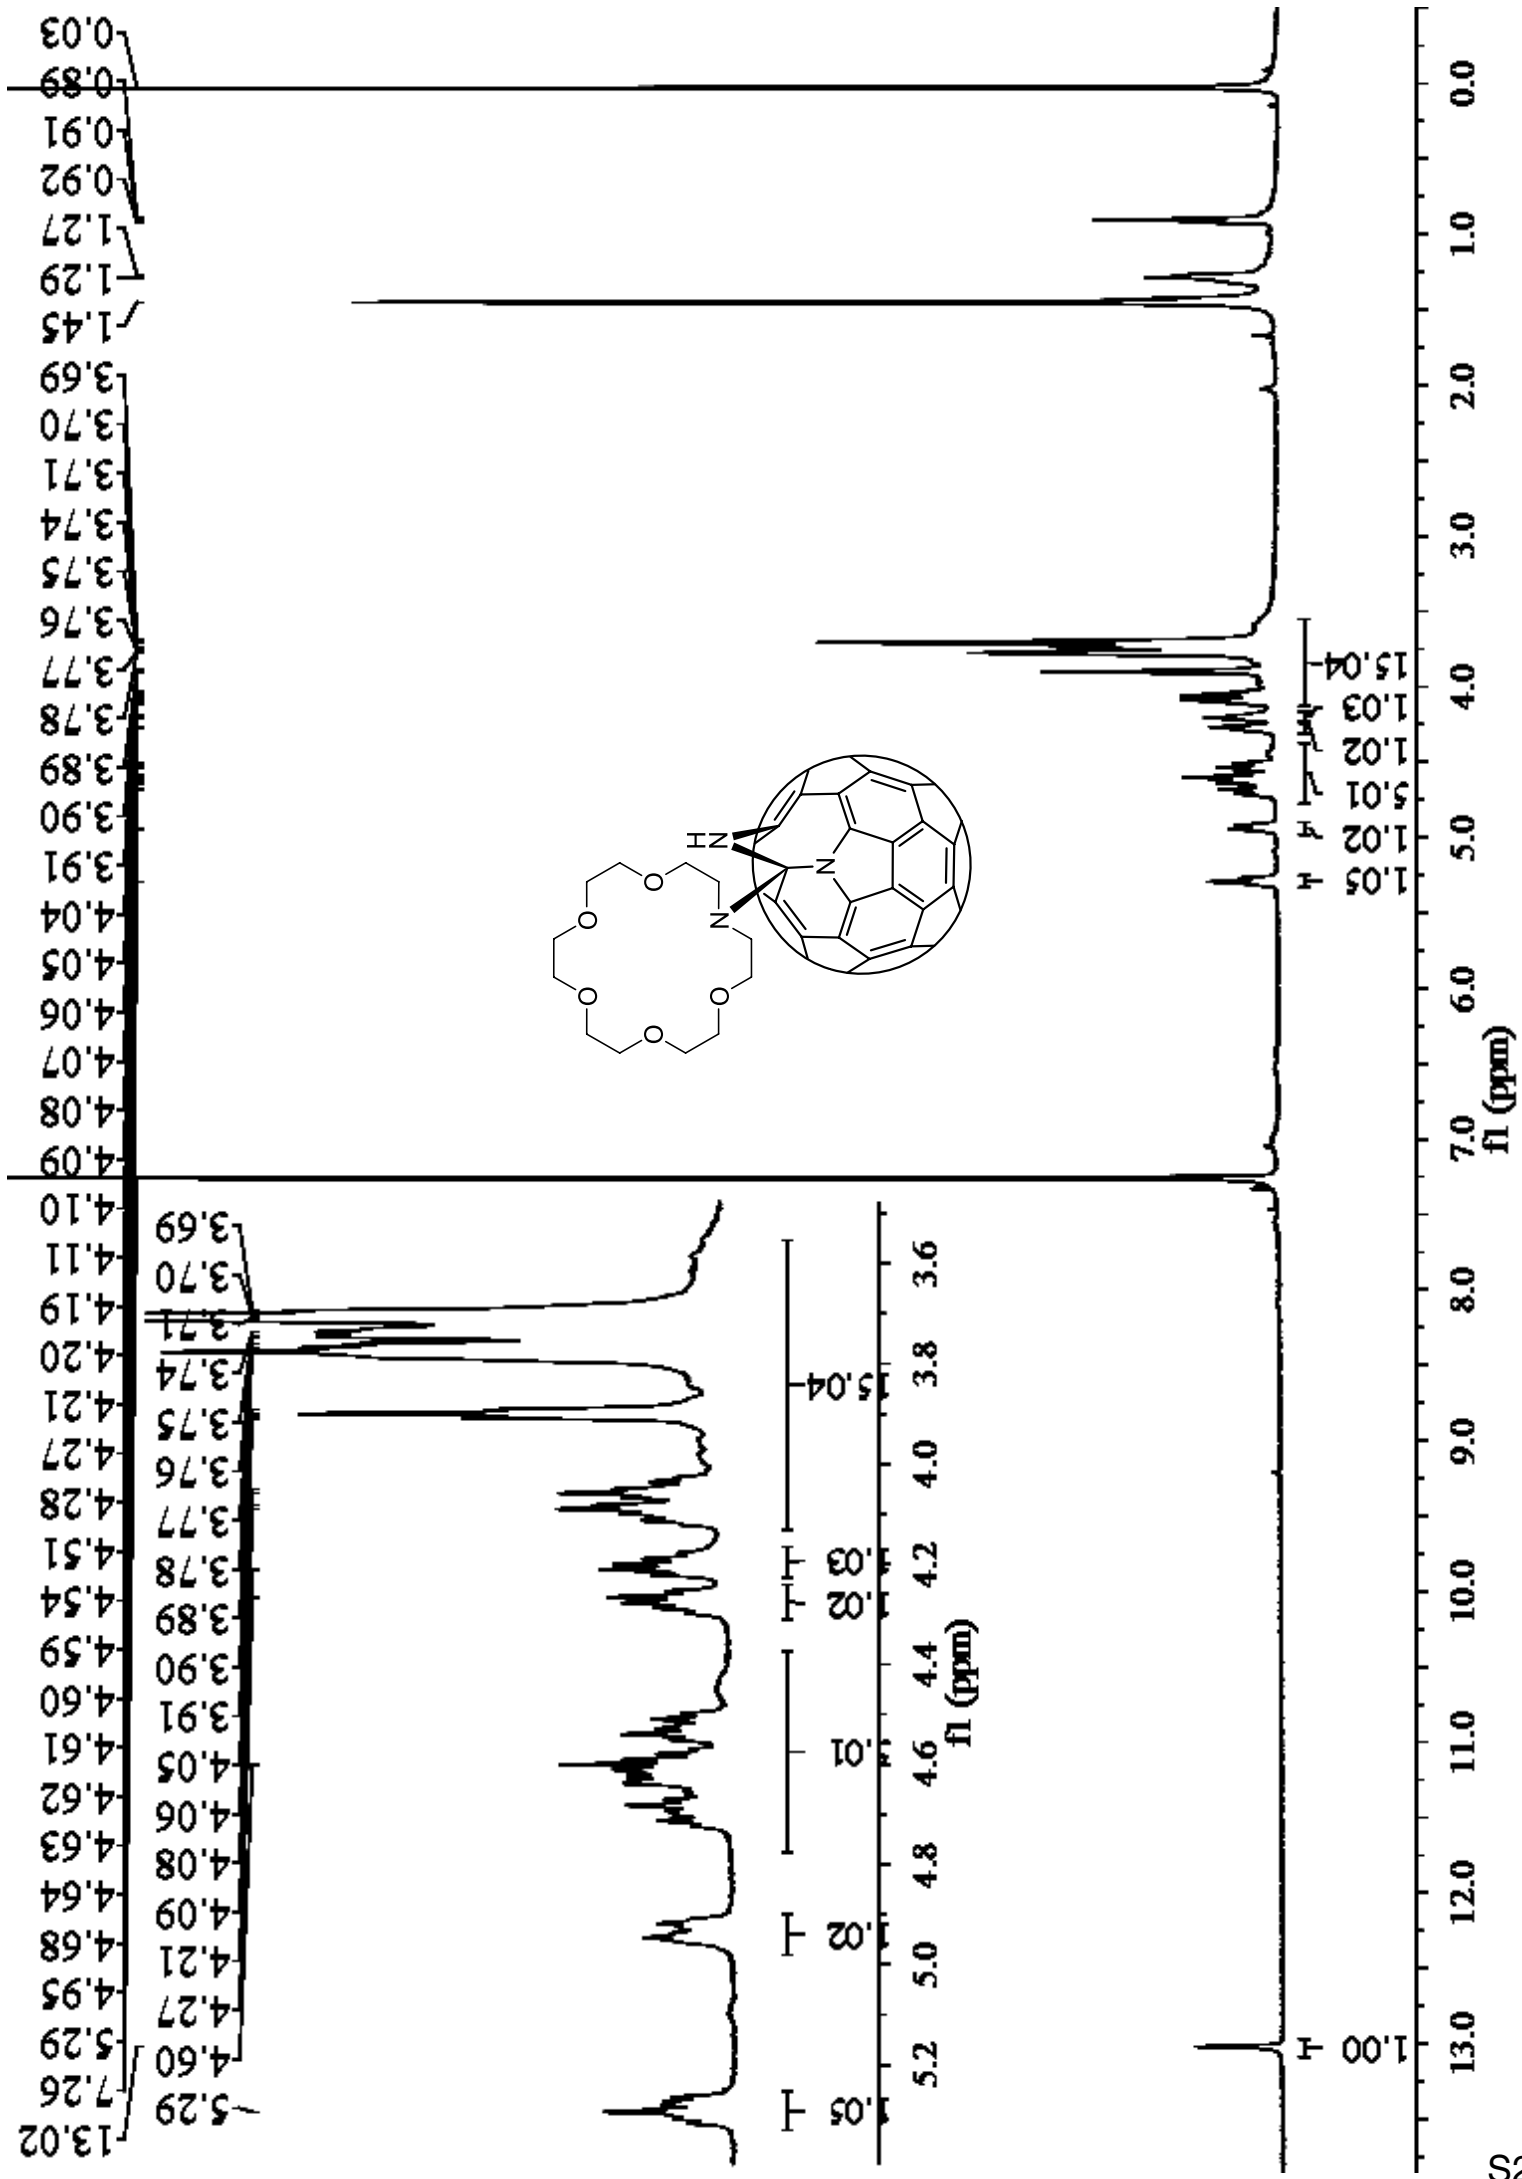

# Analysis Info

|               |                                     |                  |                        |
|---------------|-------------------------------------|------------------|------------------------|
| Analysis Name | FTMS-16100105_Pos_20161019_000001.d | Acquisition Date | 10/19/2016 2:25:40 PM  |
| Sample        | LYB-N-1                             | Instrument       | Bruker Solarix XR FTMS |
| Comment       |                                     | Operator         | Peking University      |

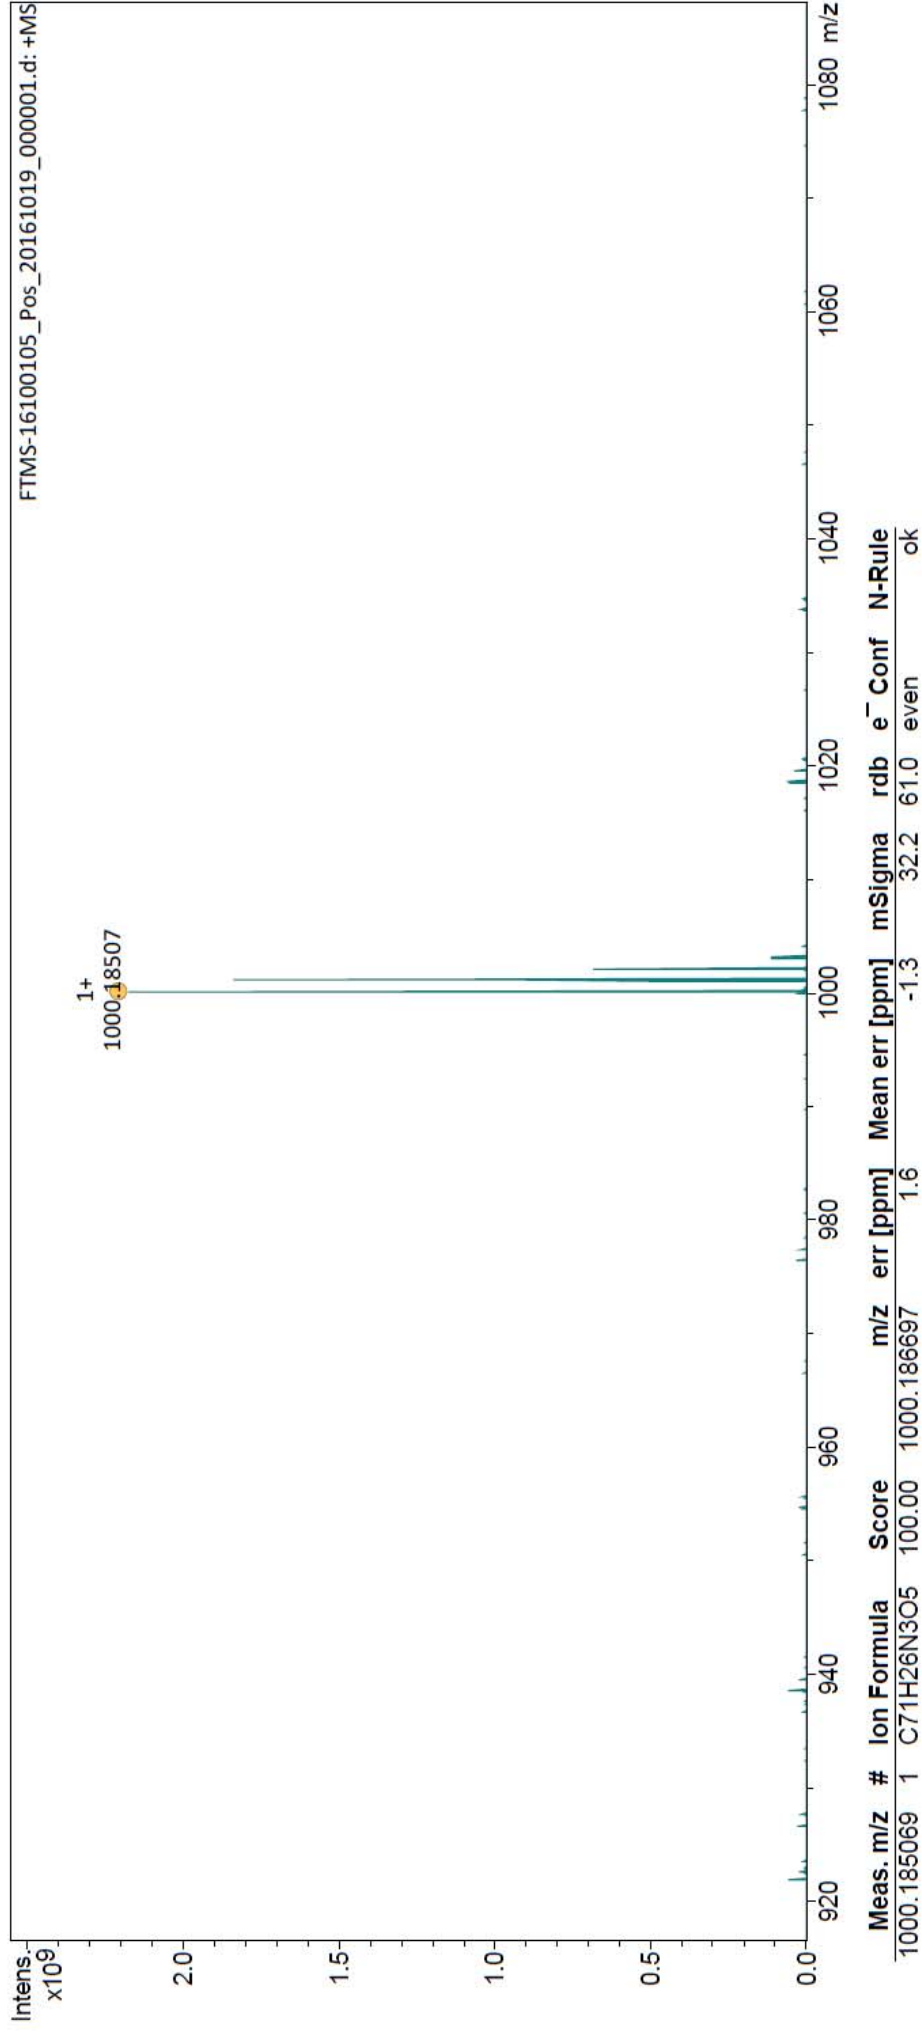

# Analysis Info

Analysis Name FTMS-16100103\_Pos\_20161018\_000003.d  
 Sample LYB-N-18-c-6  
 Comment

Acquisition Date 10/18/2016 4:55:44 PM  
 Instrument Bruker Solarix XR FTMS  
 Operator Peking University

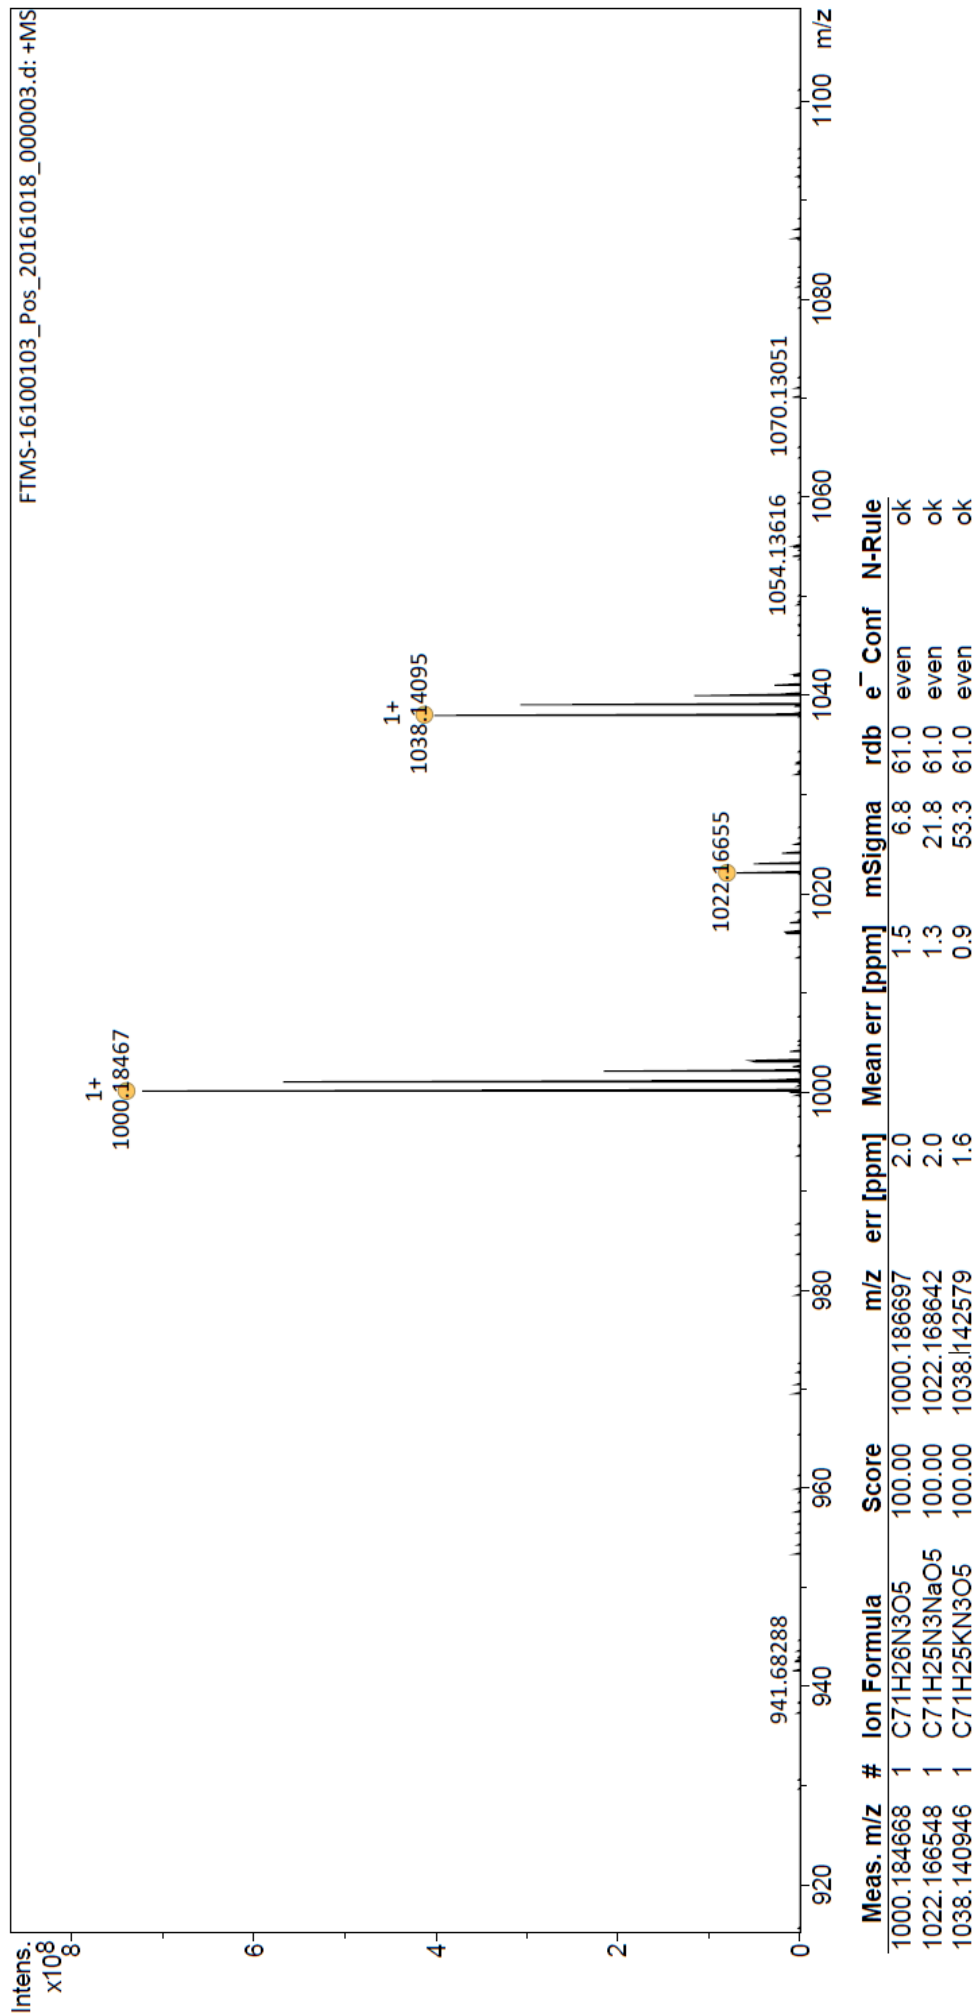

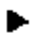

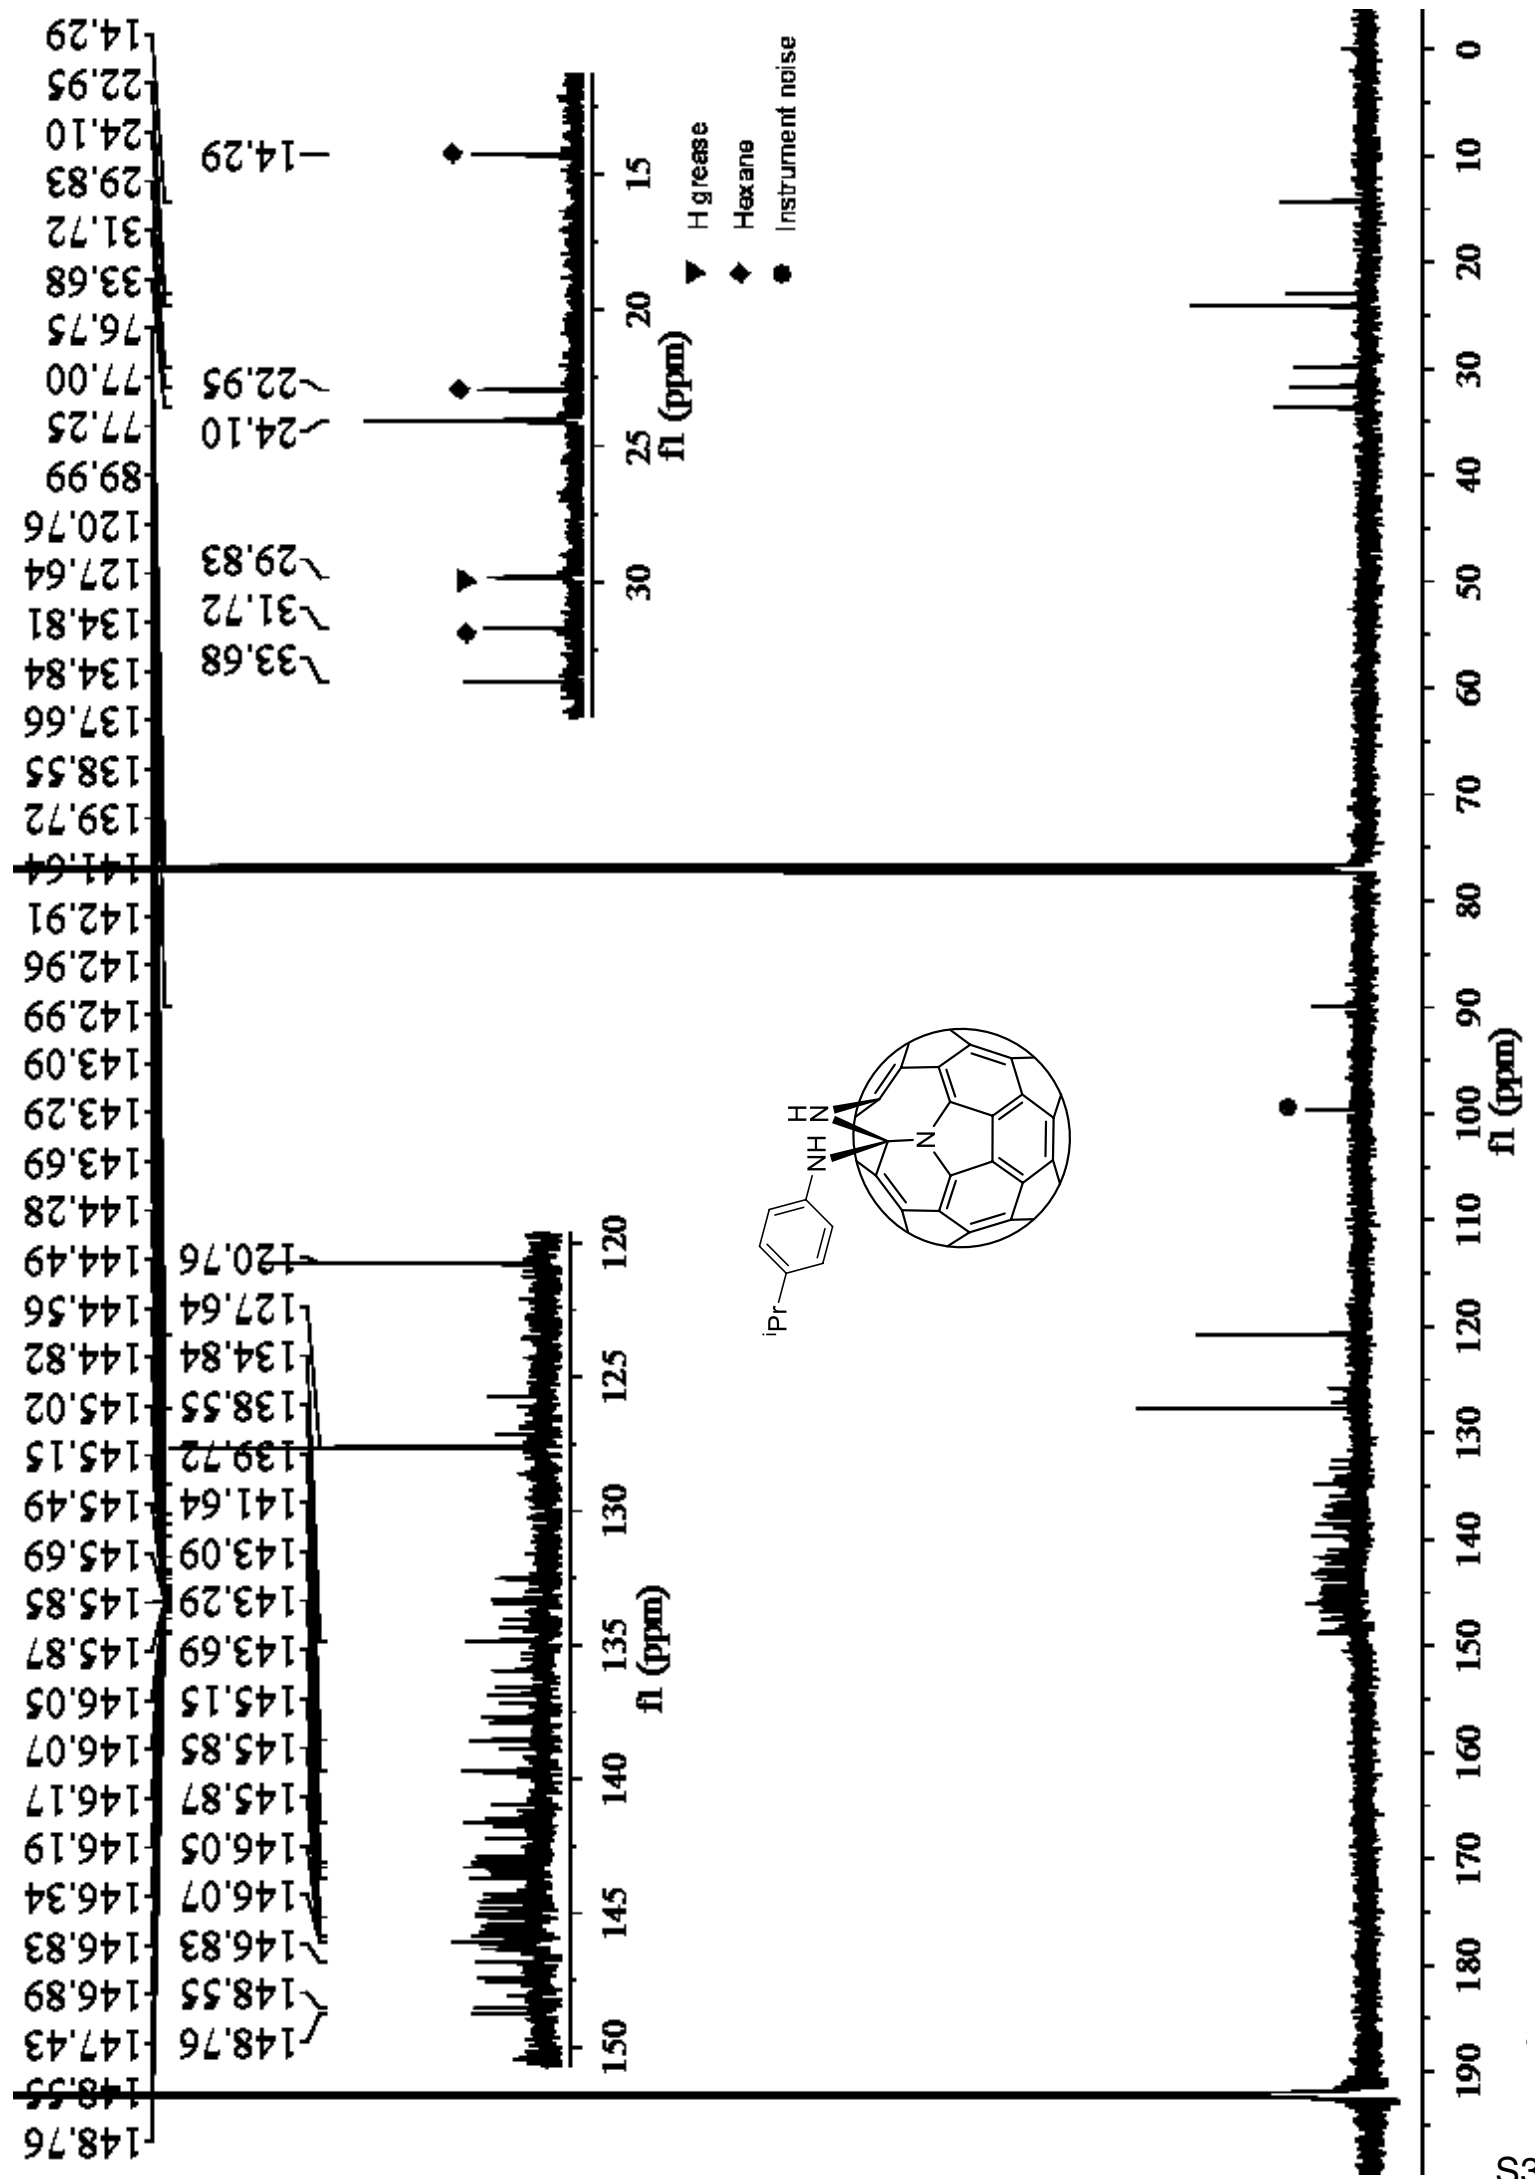

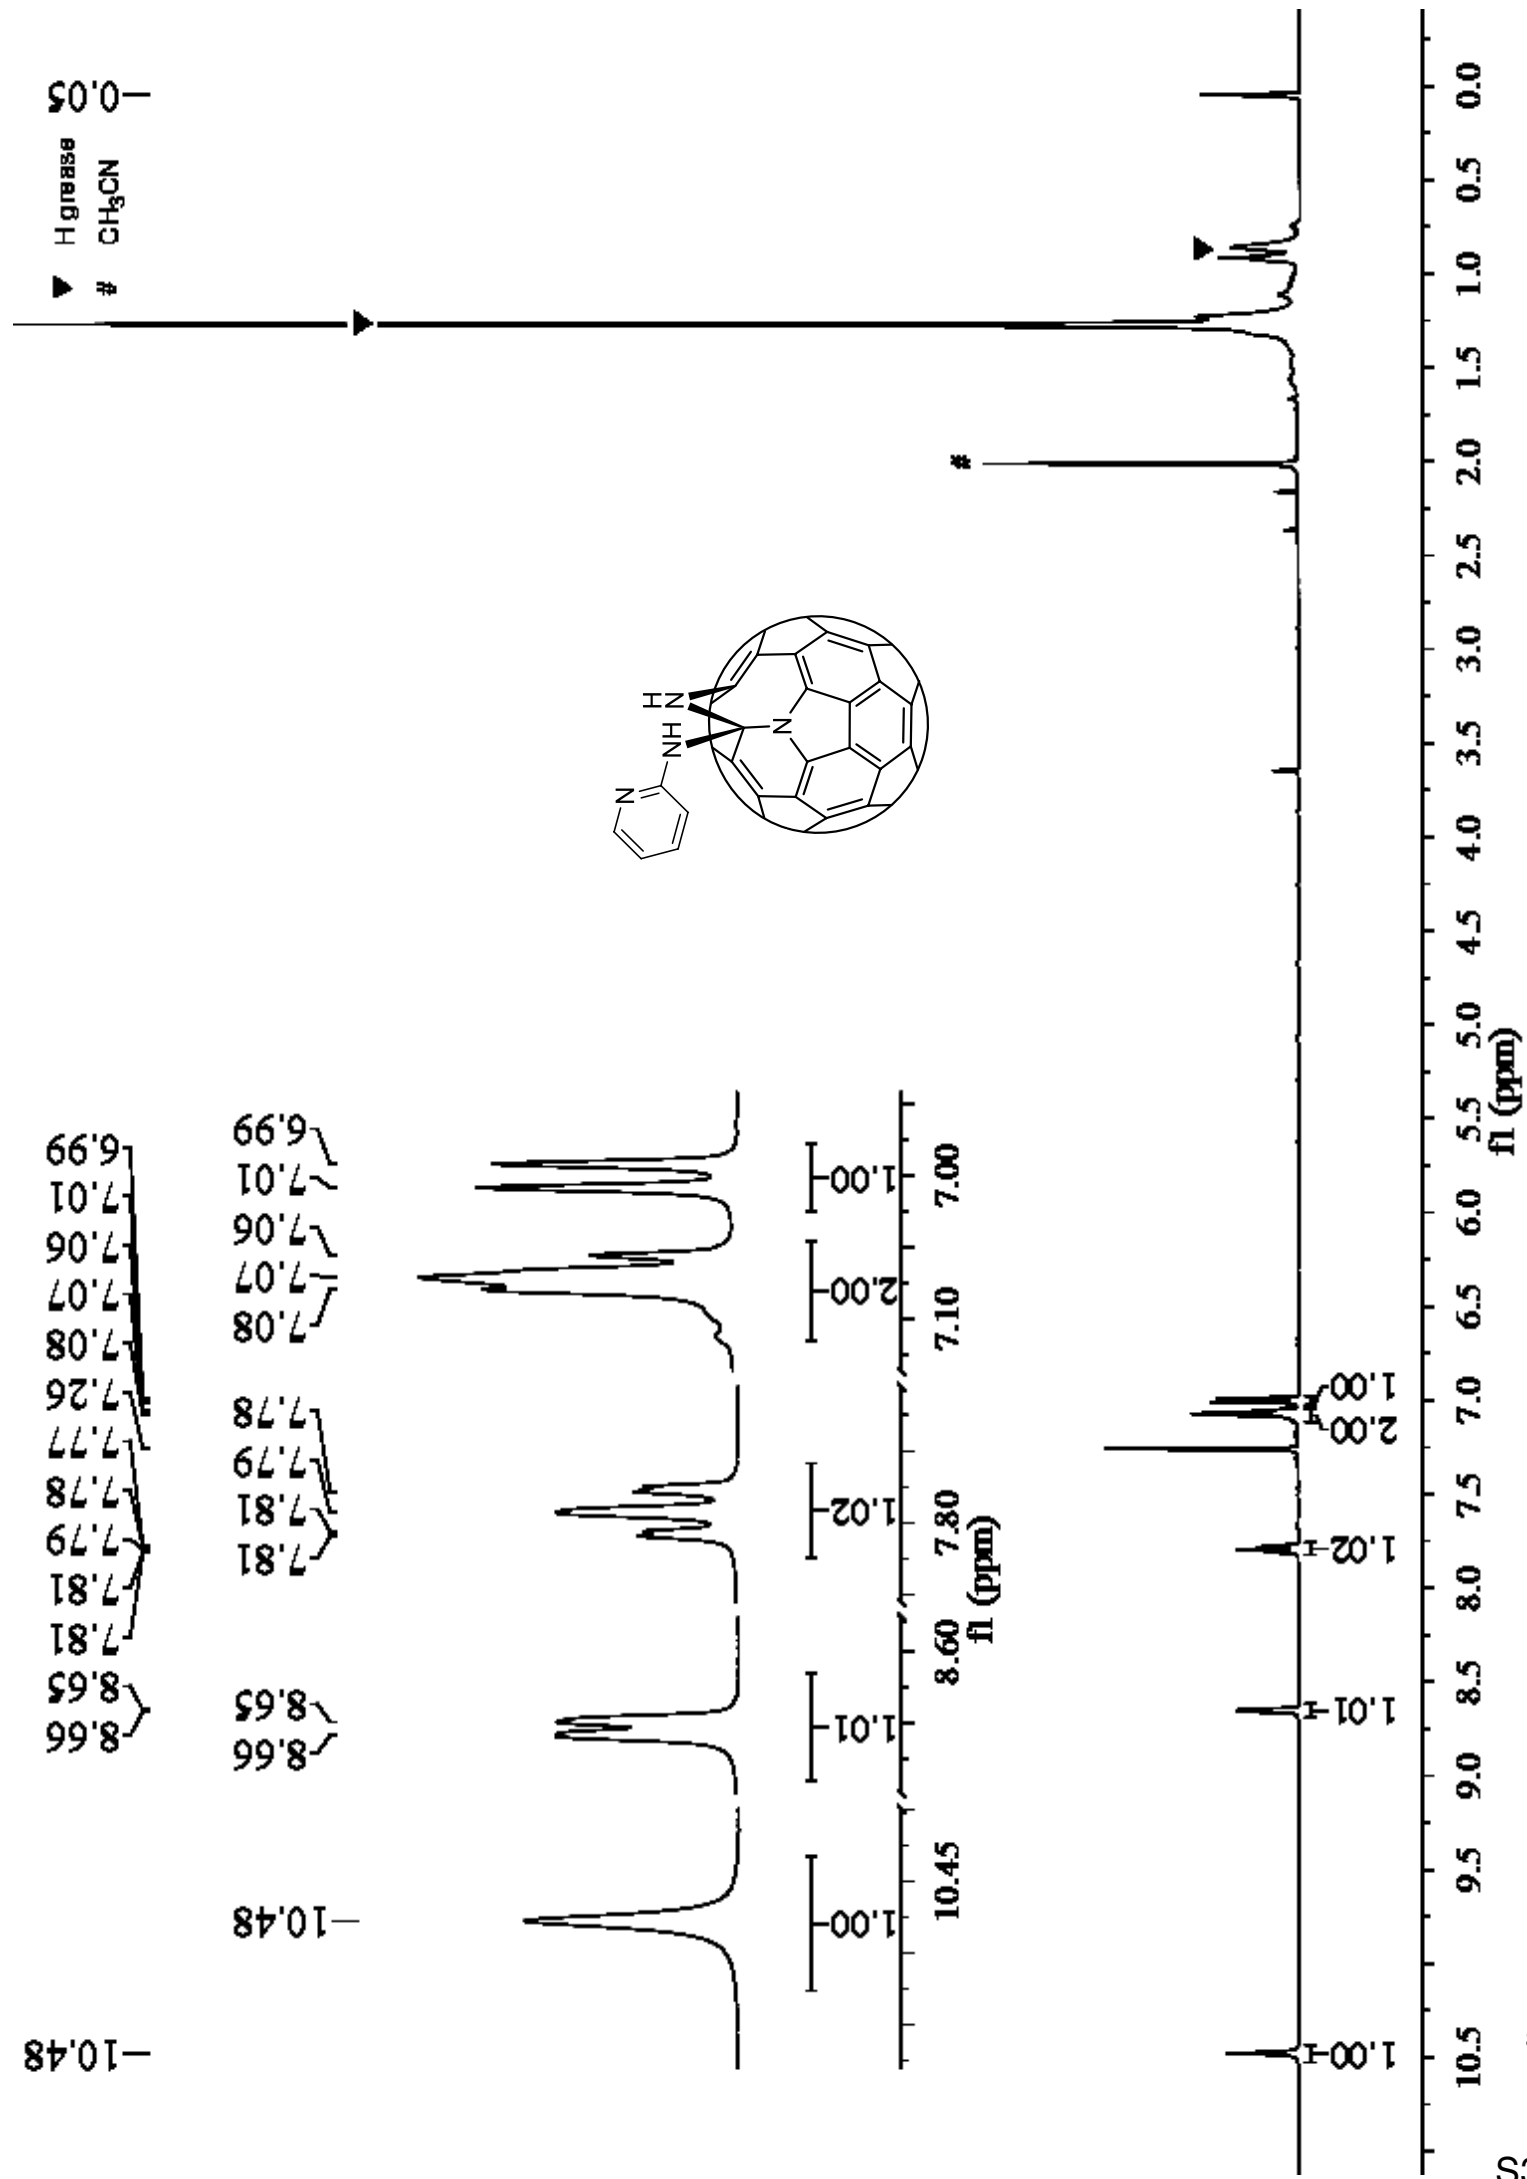



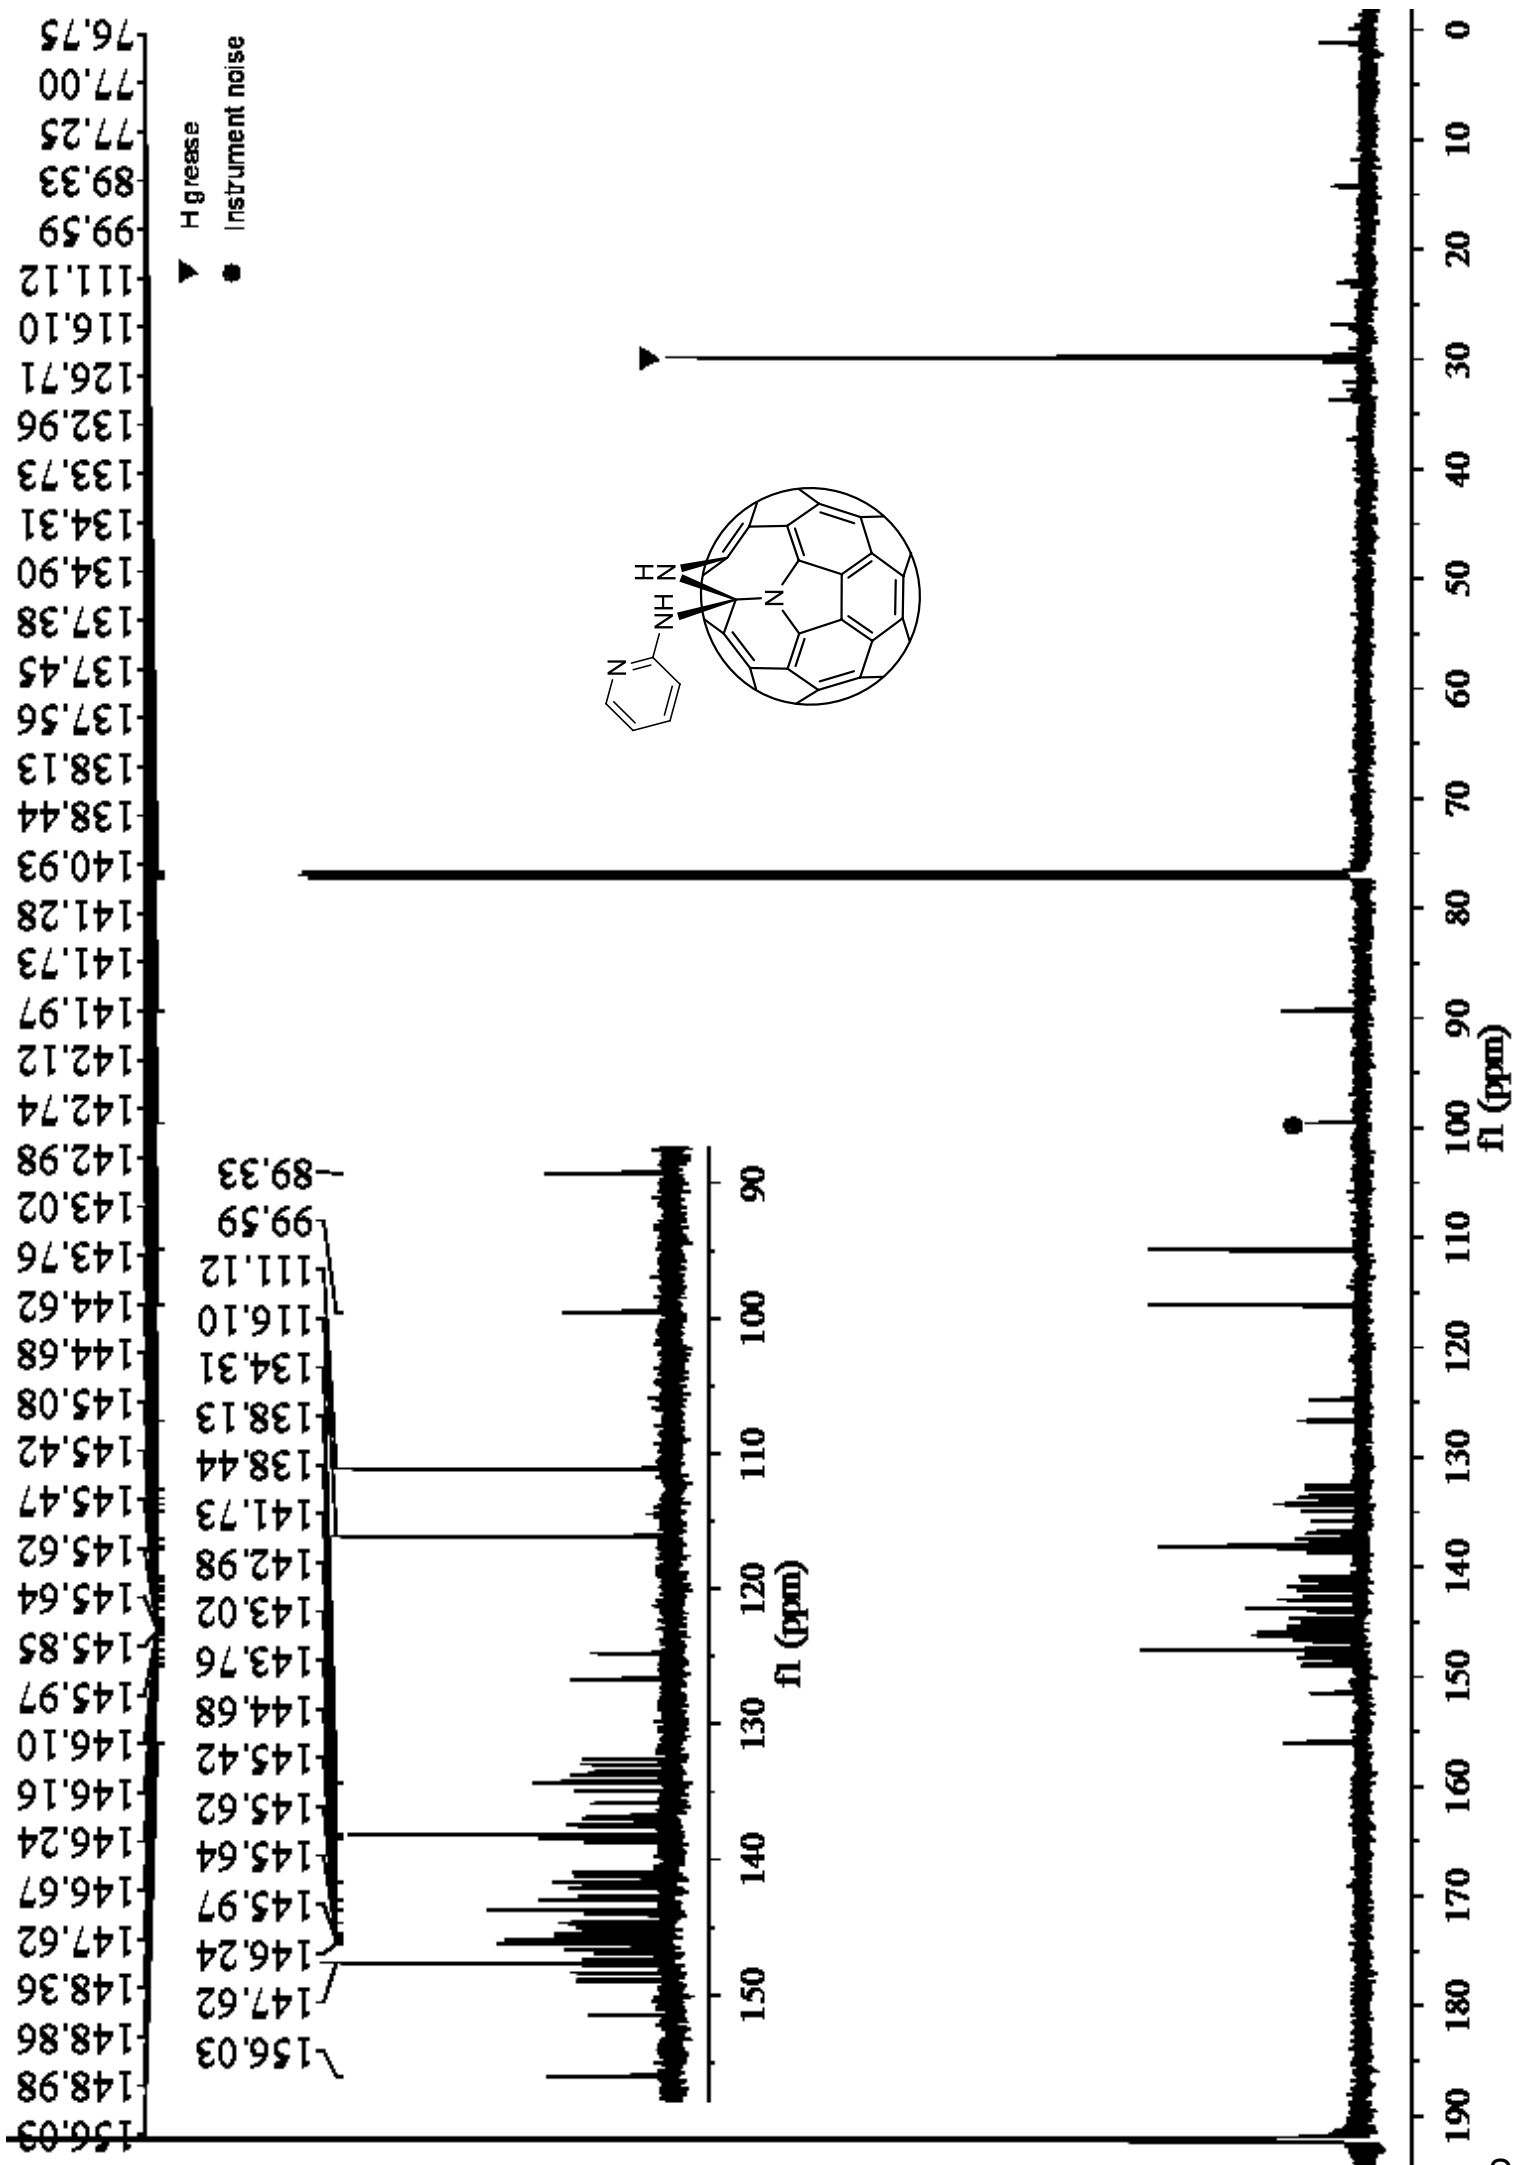

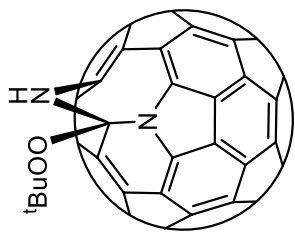

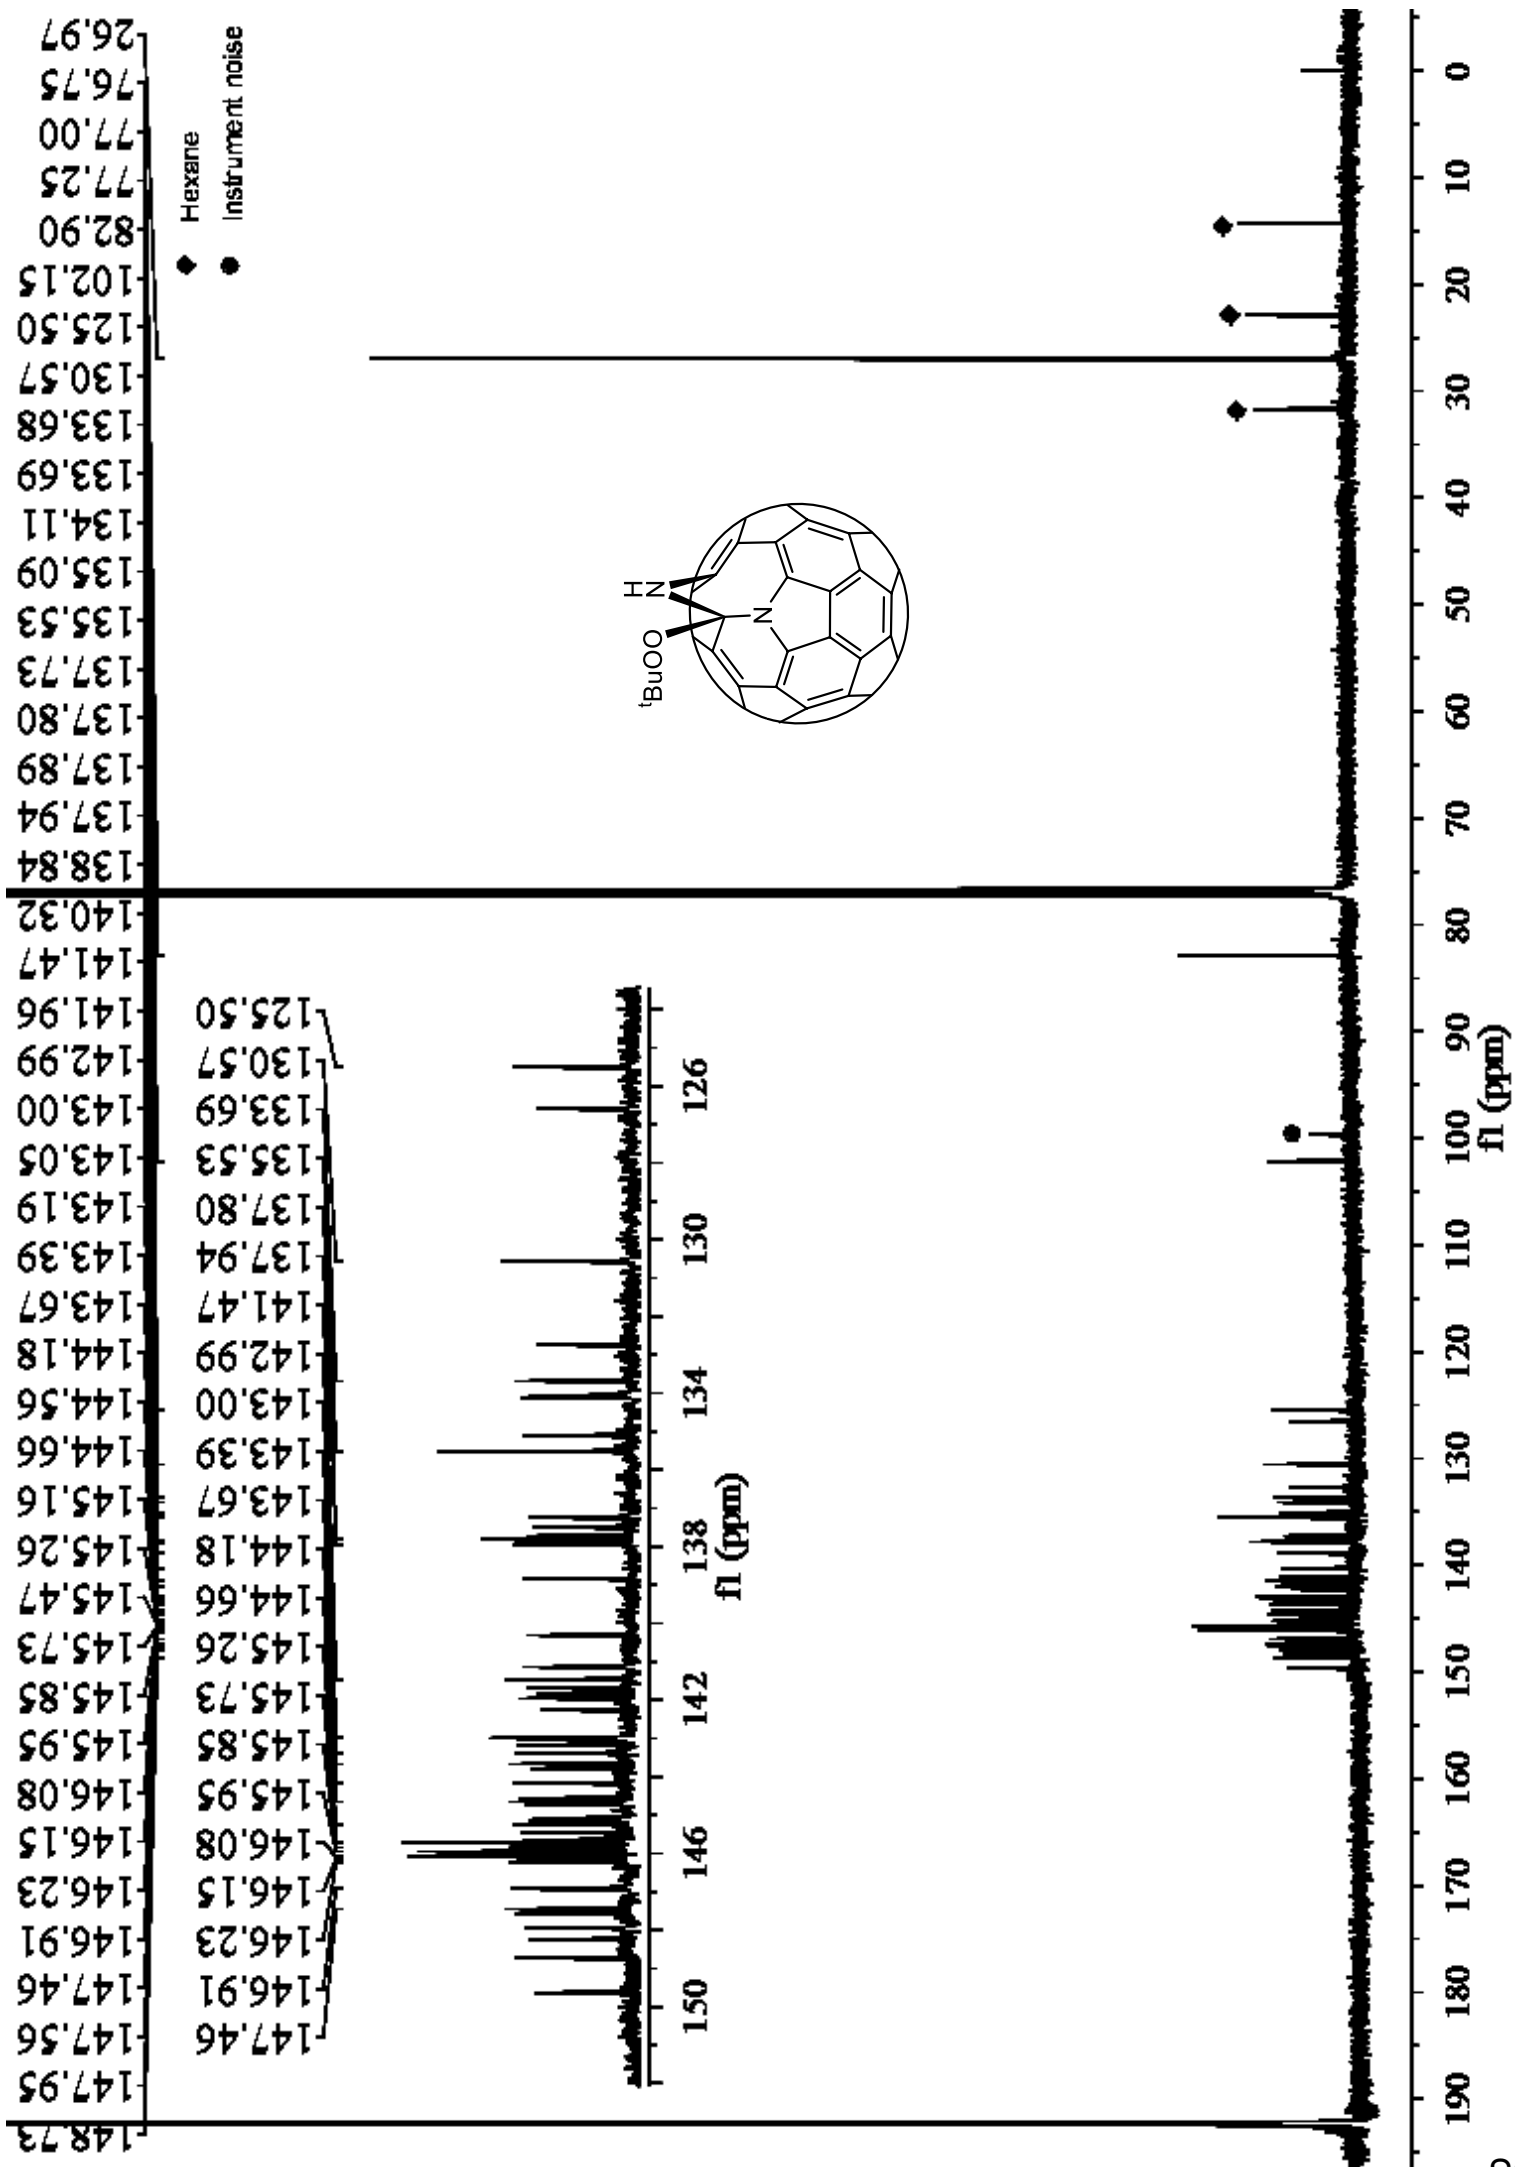

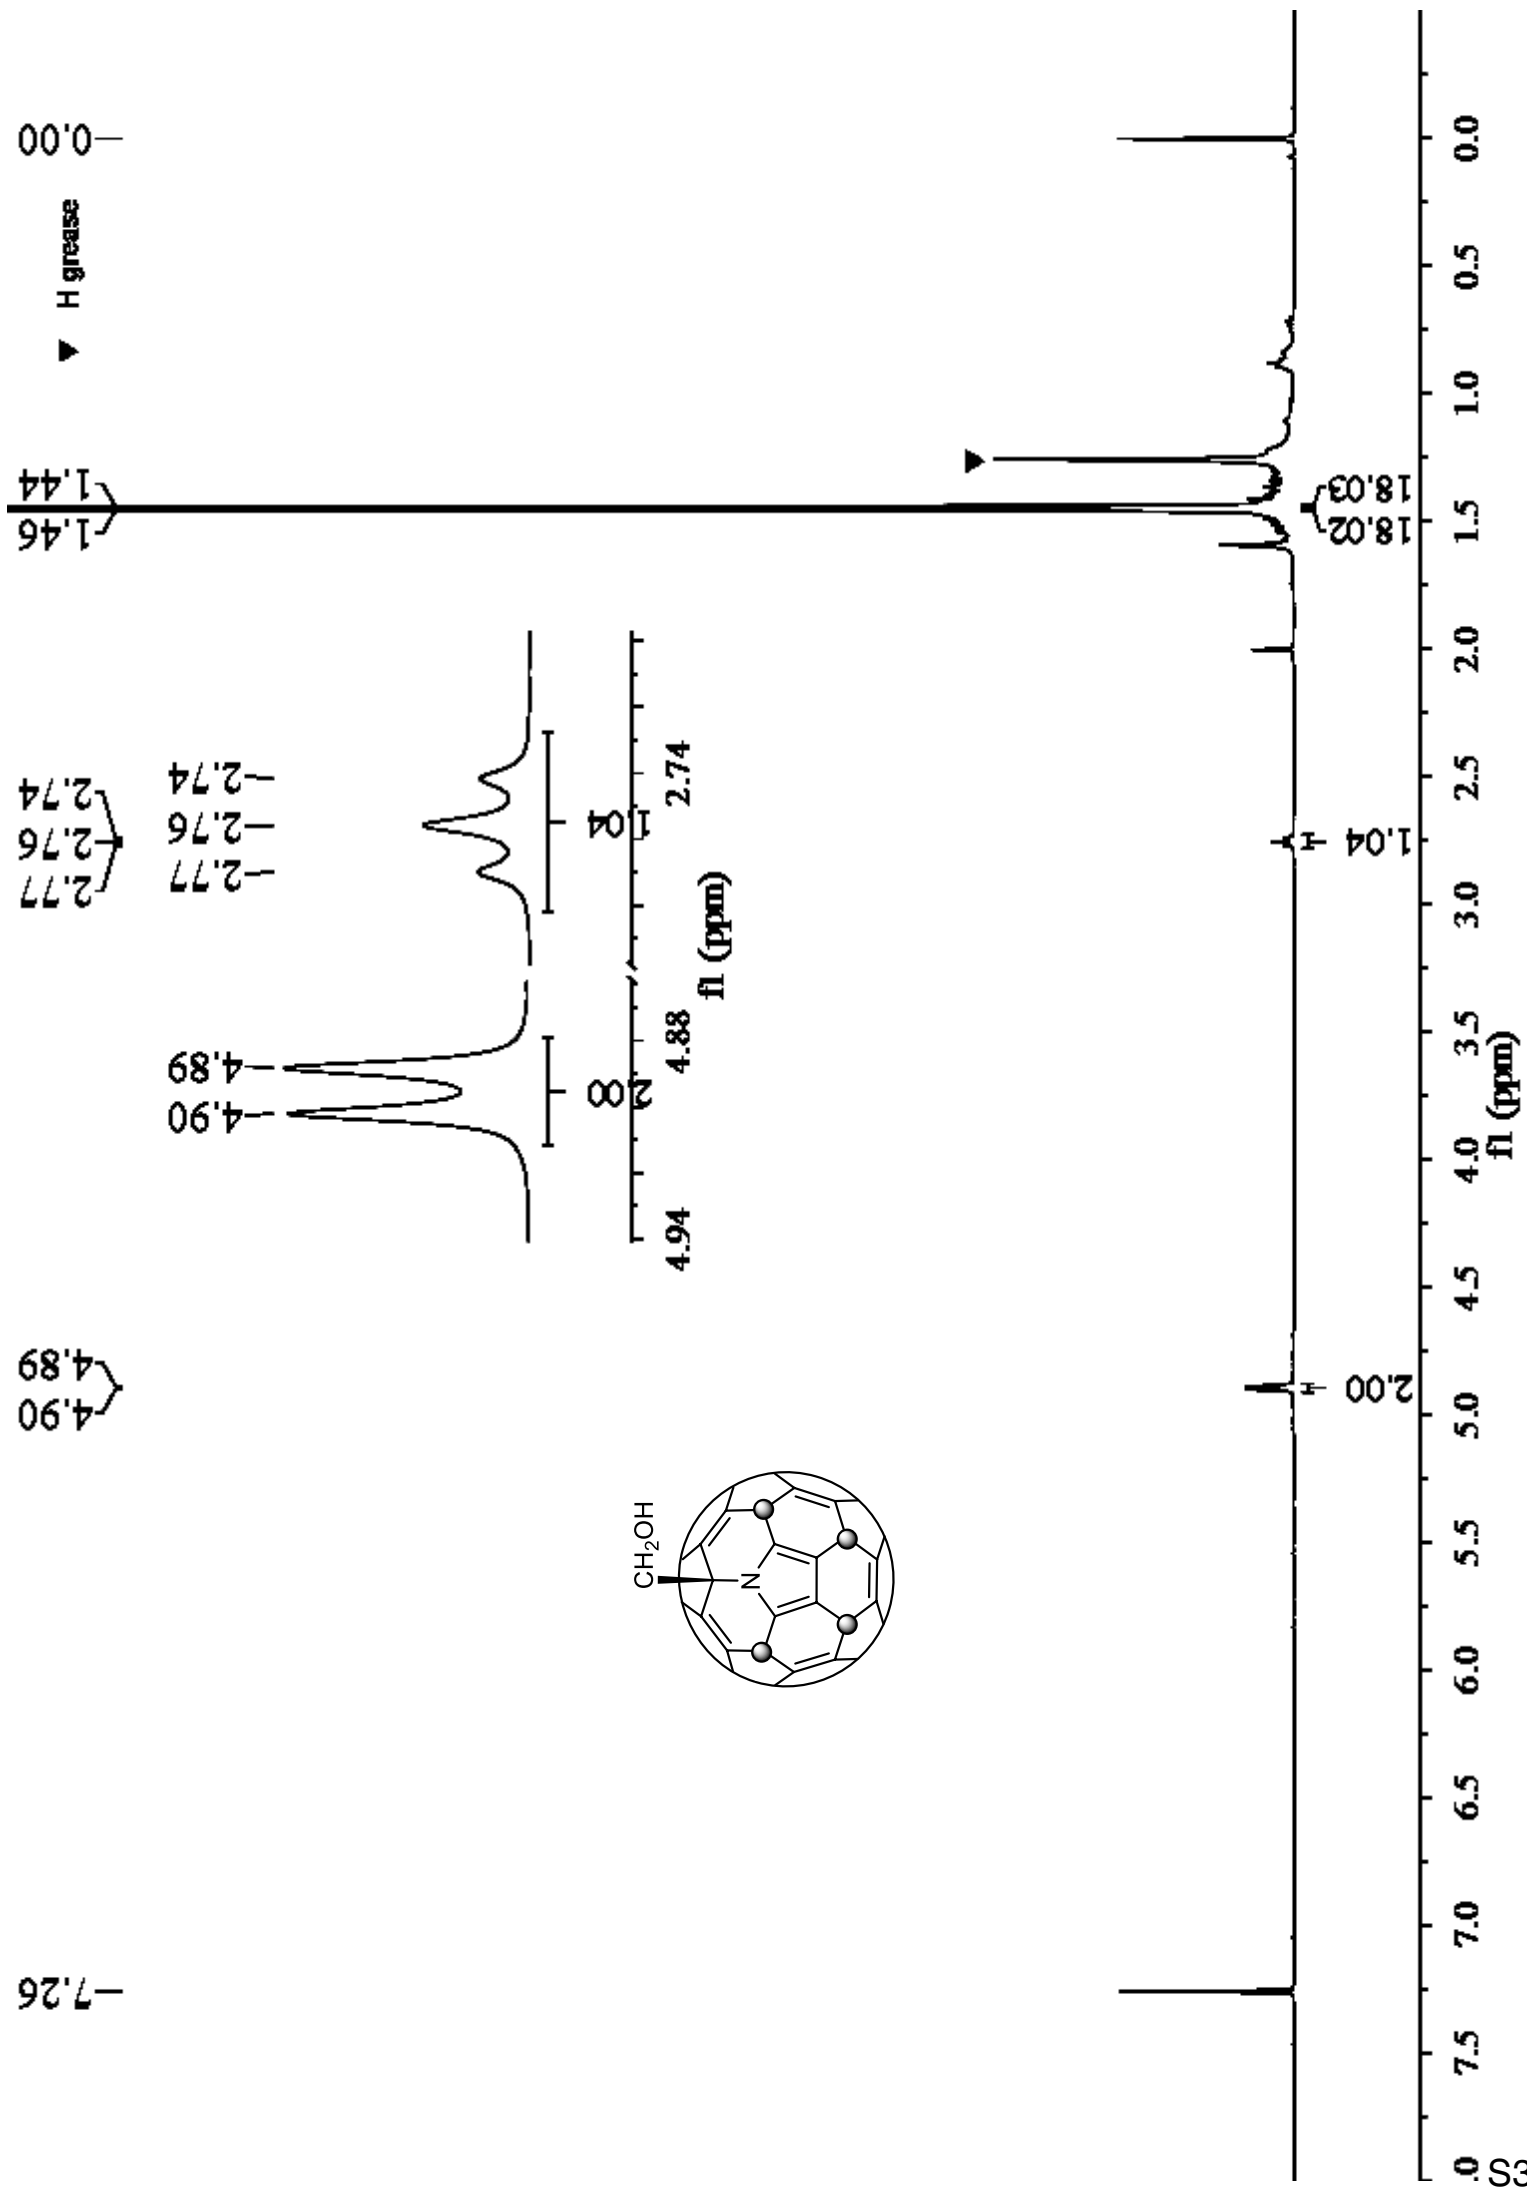

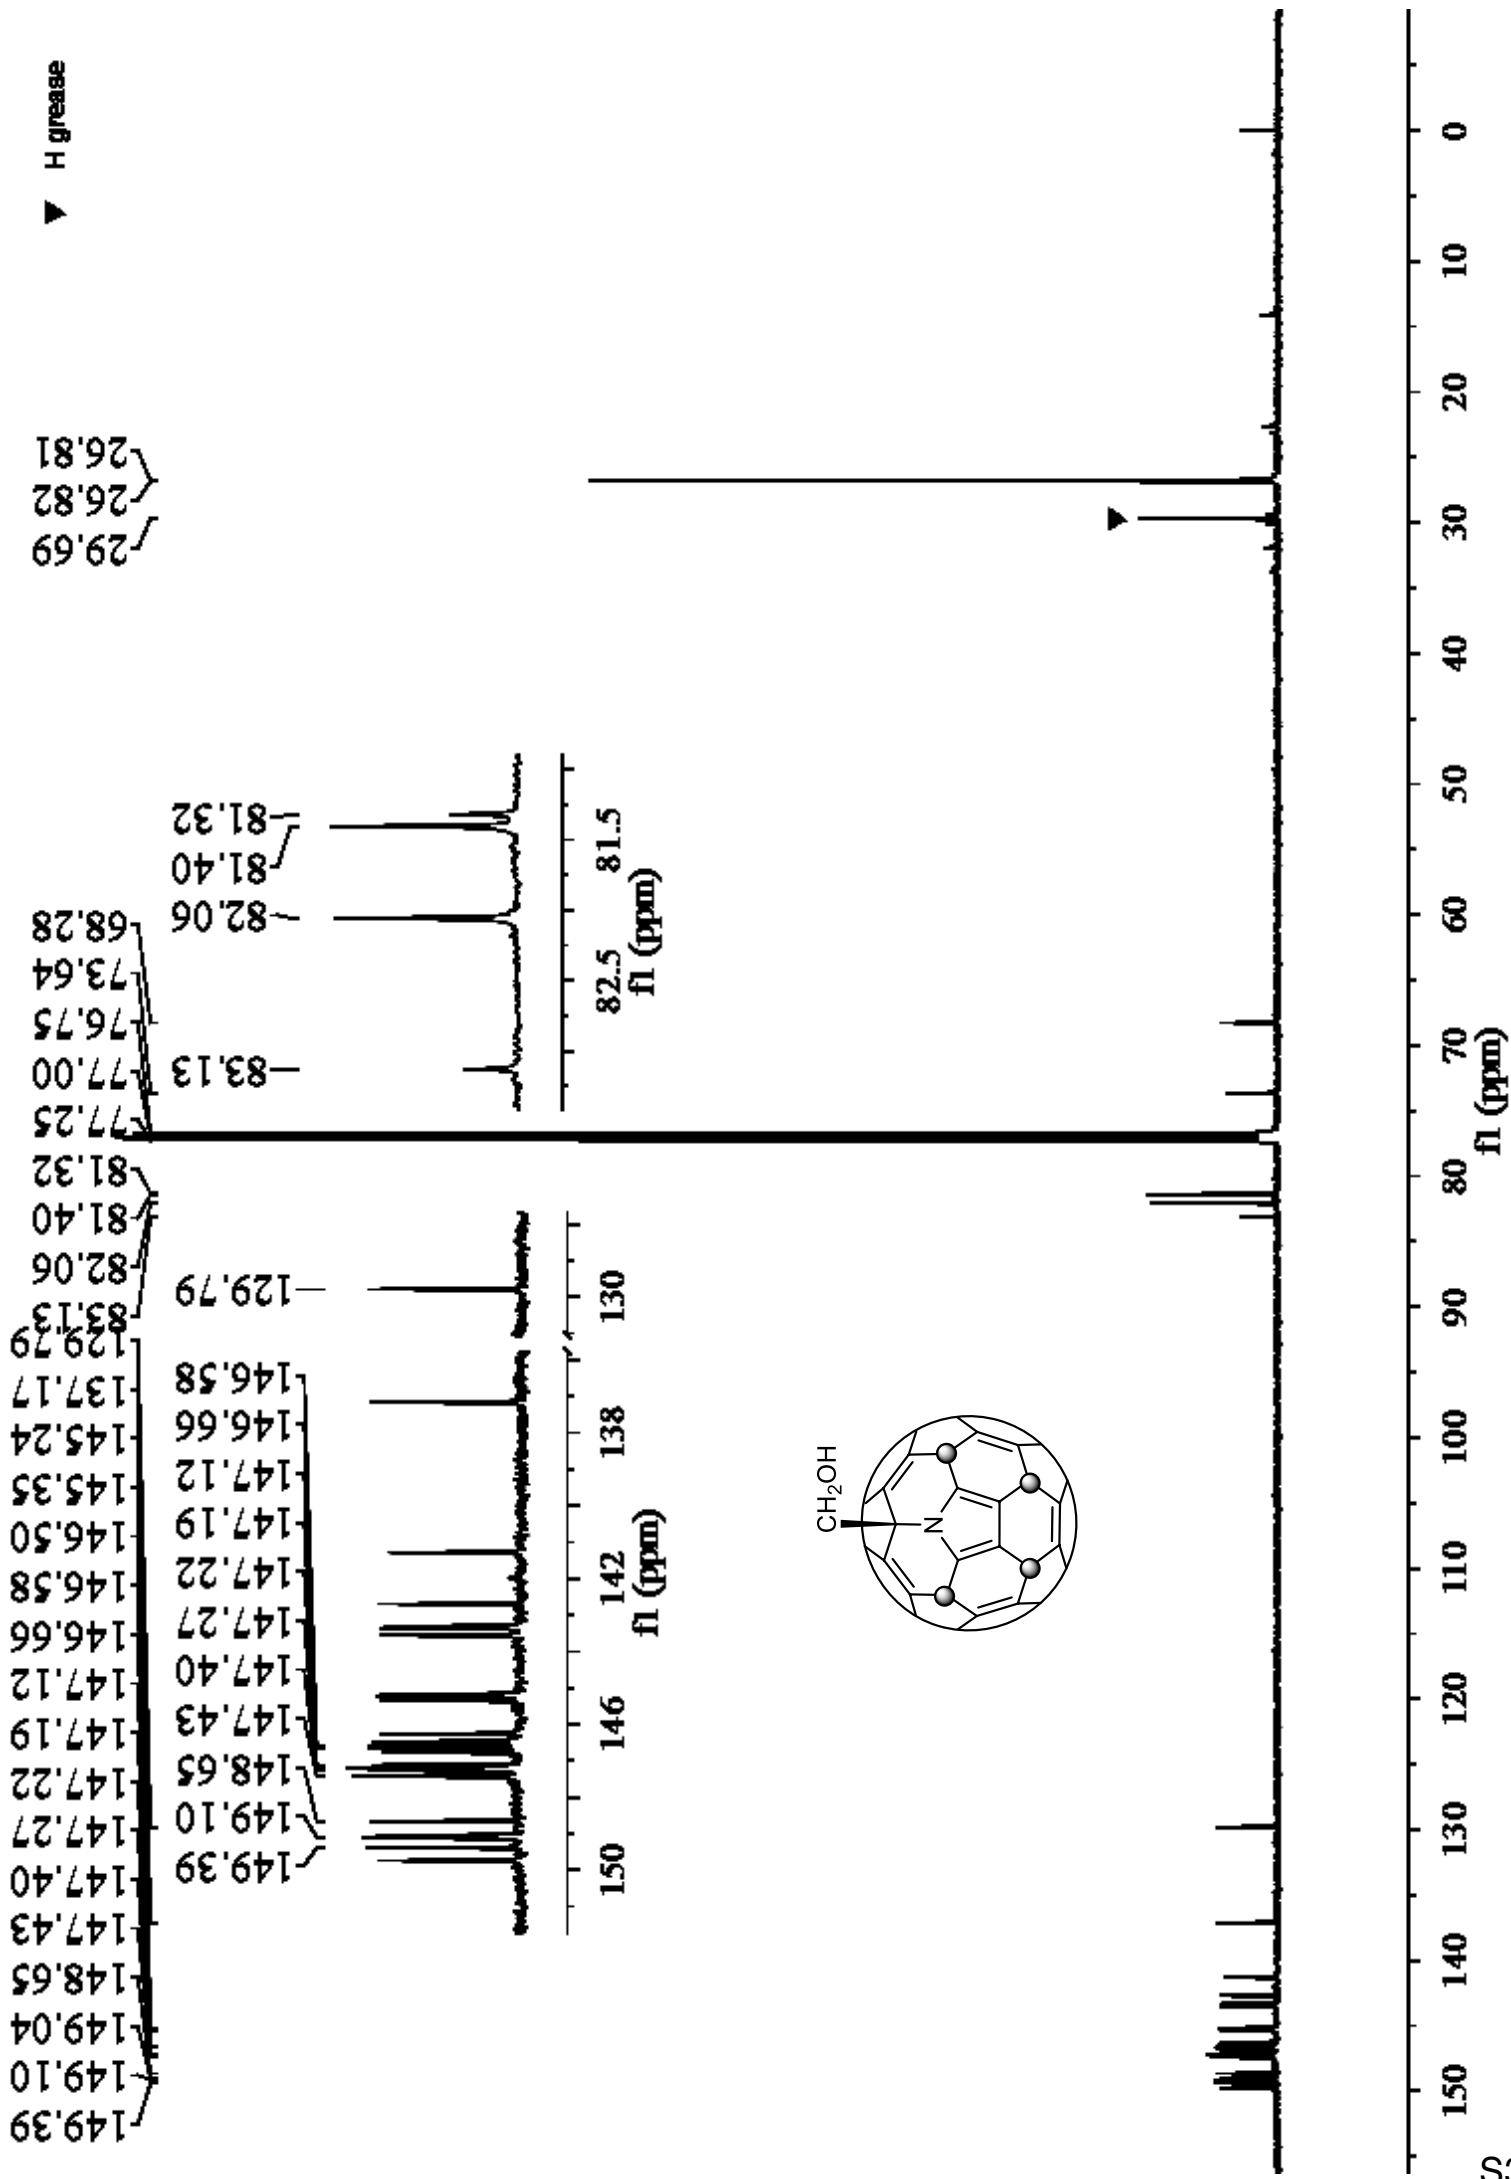

▼ H grease

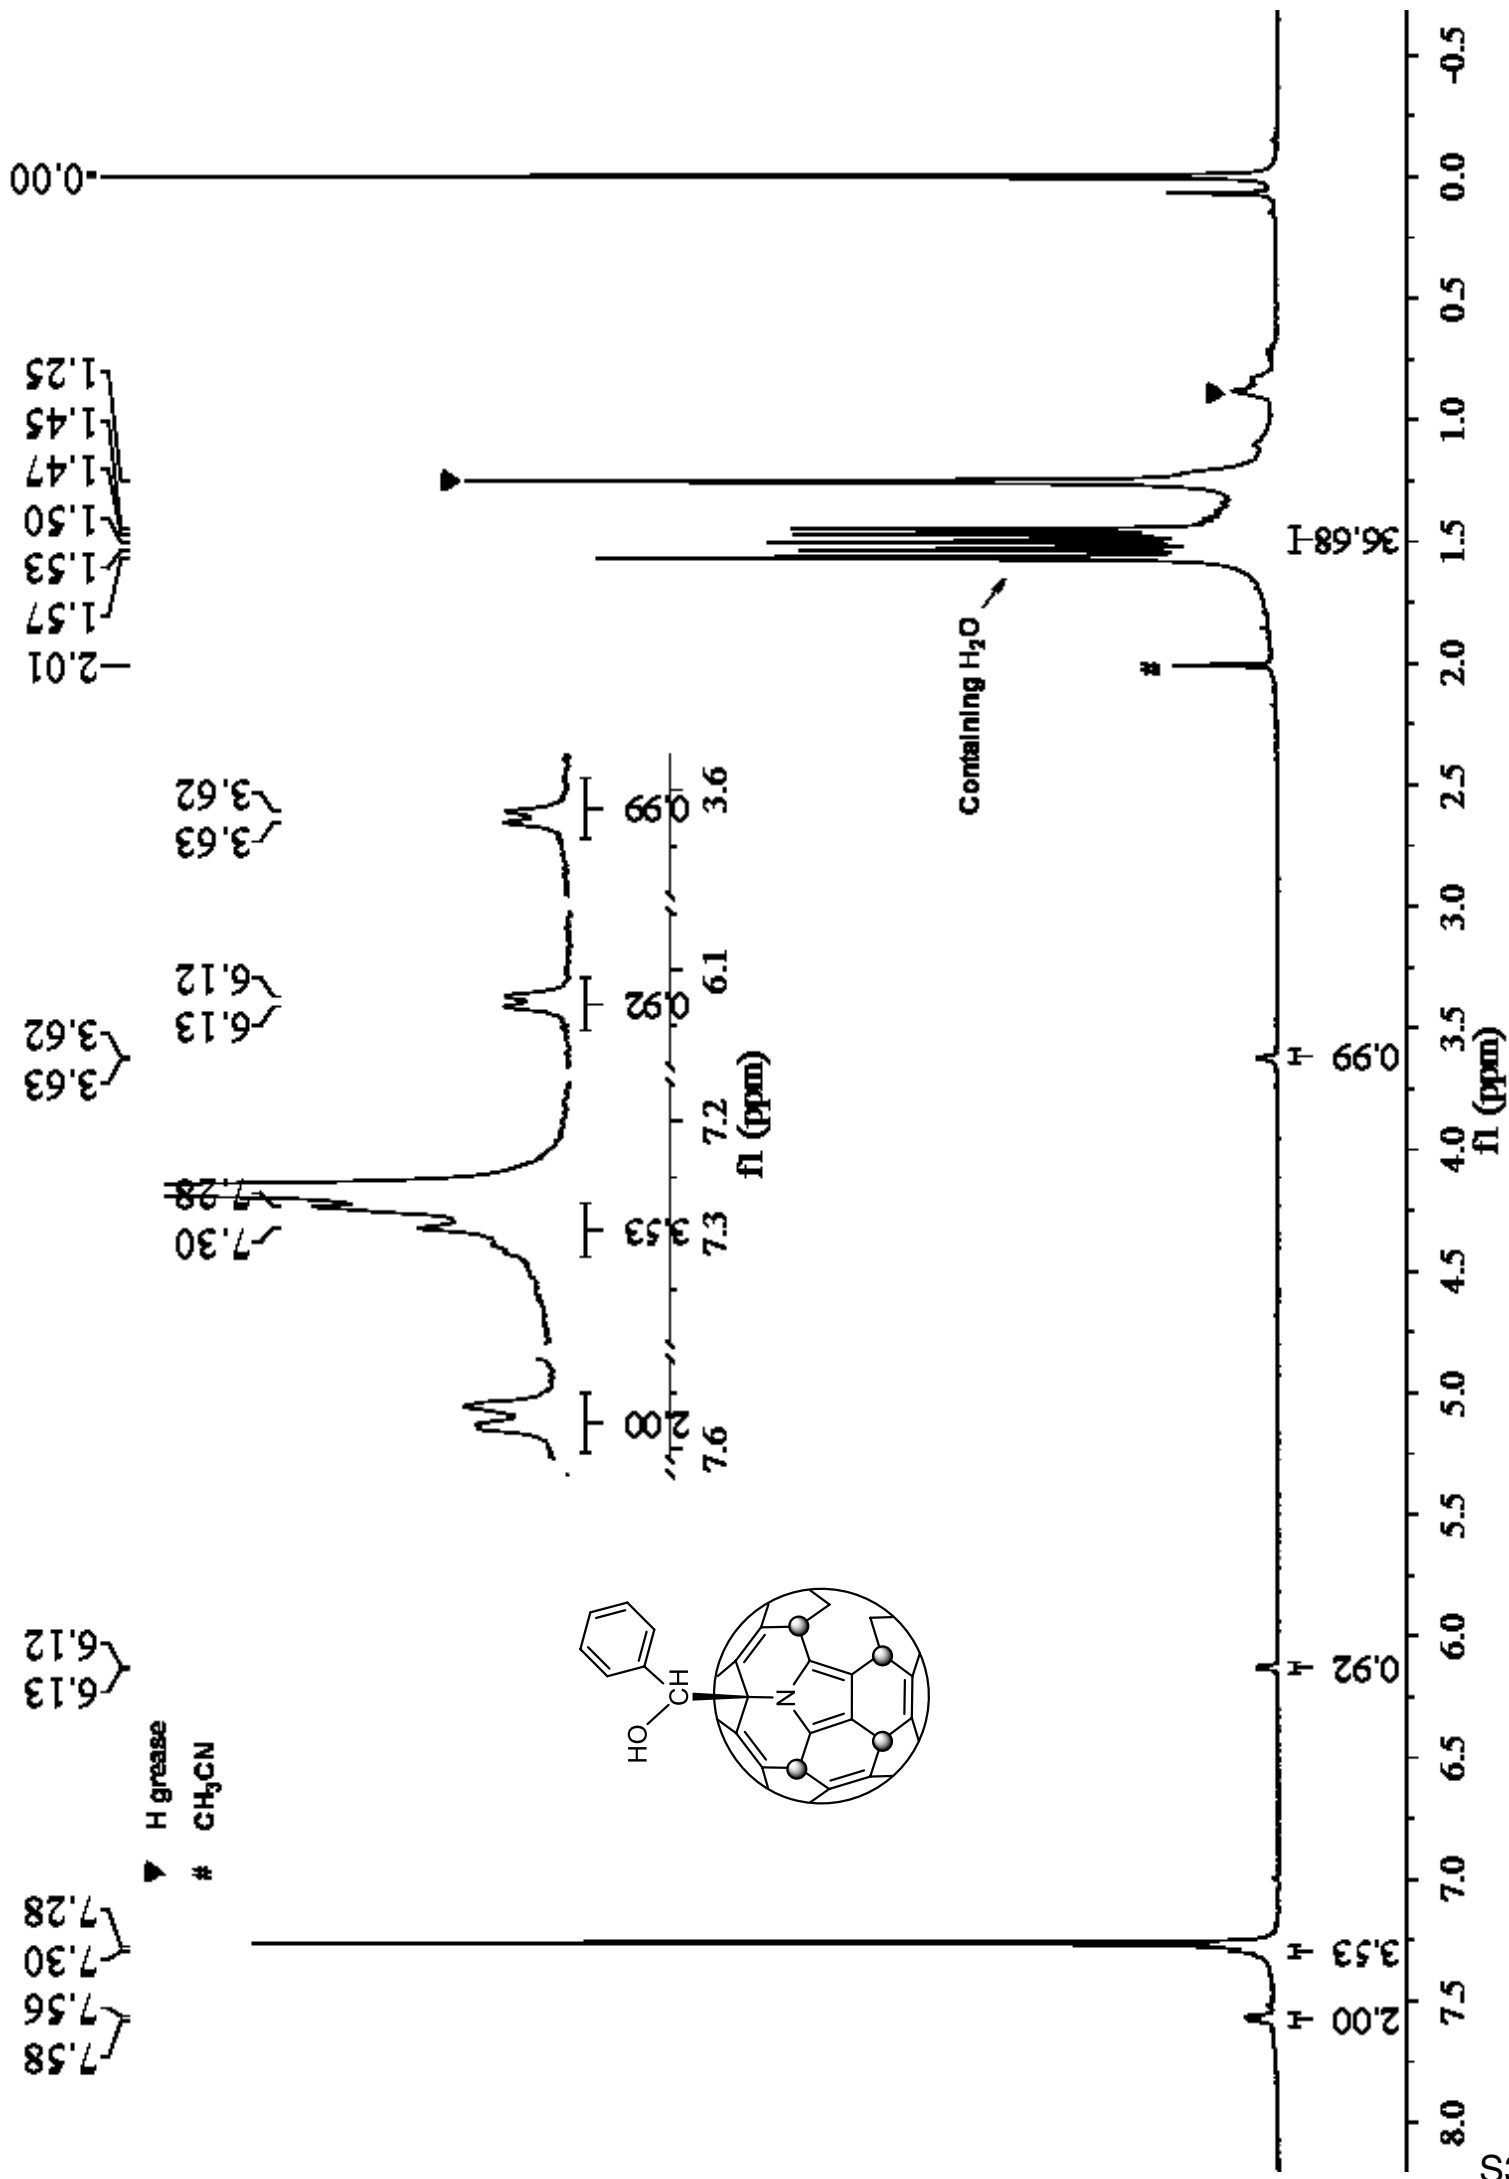

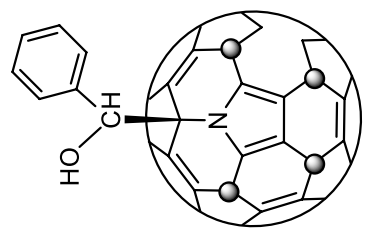

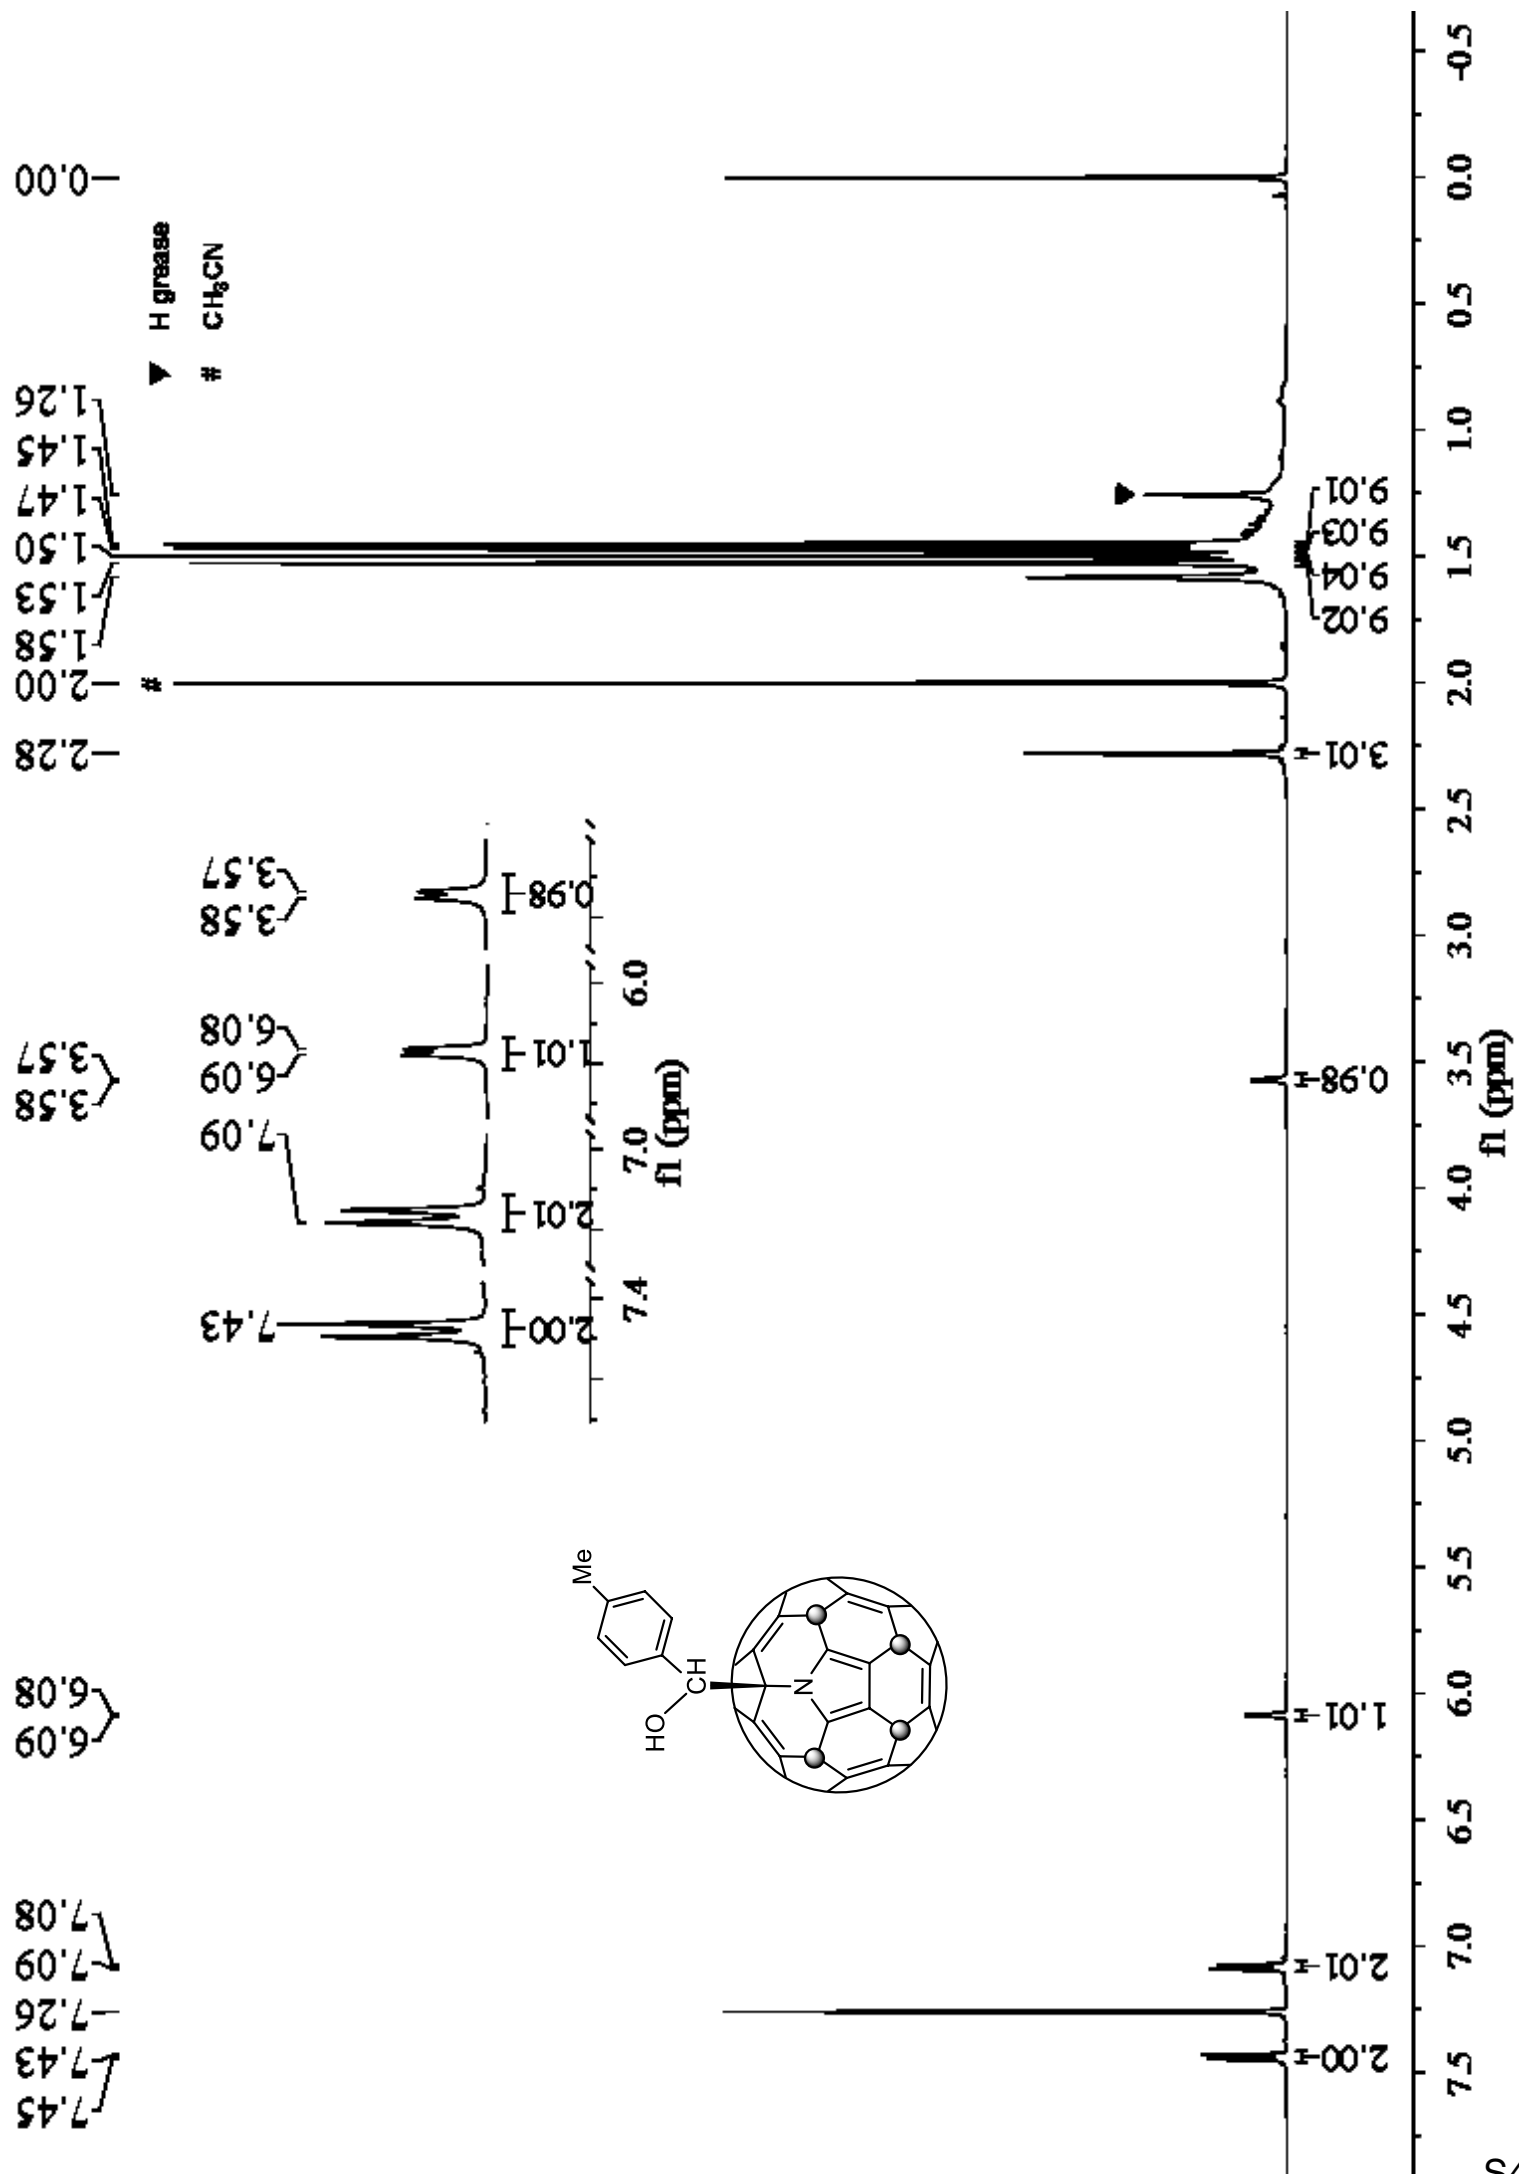



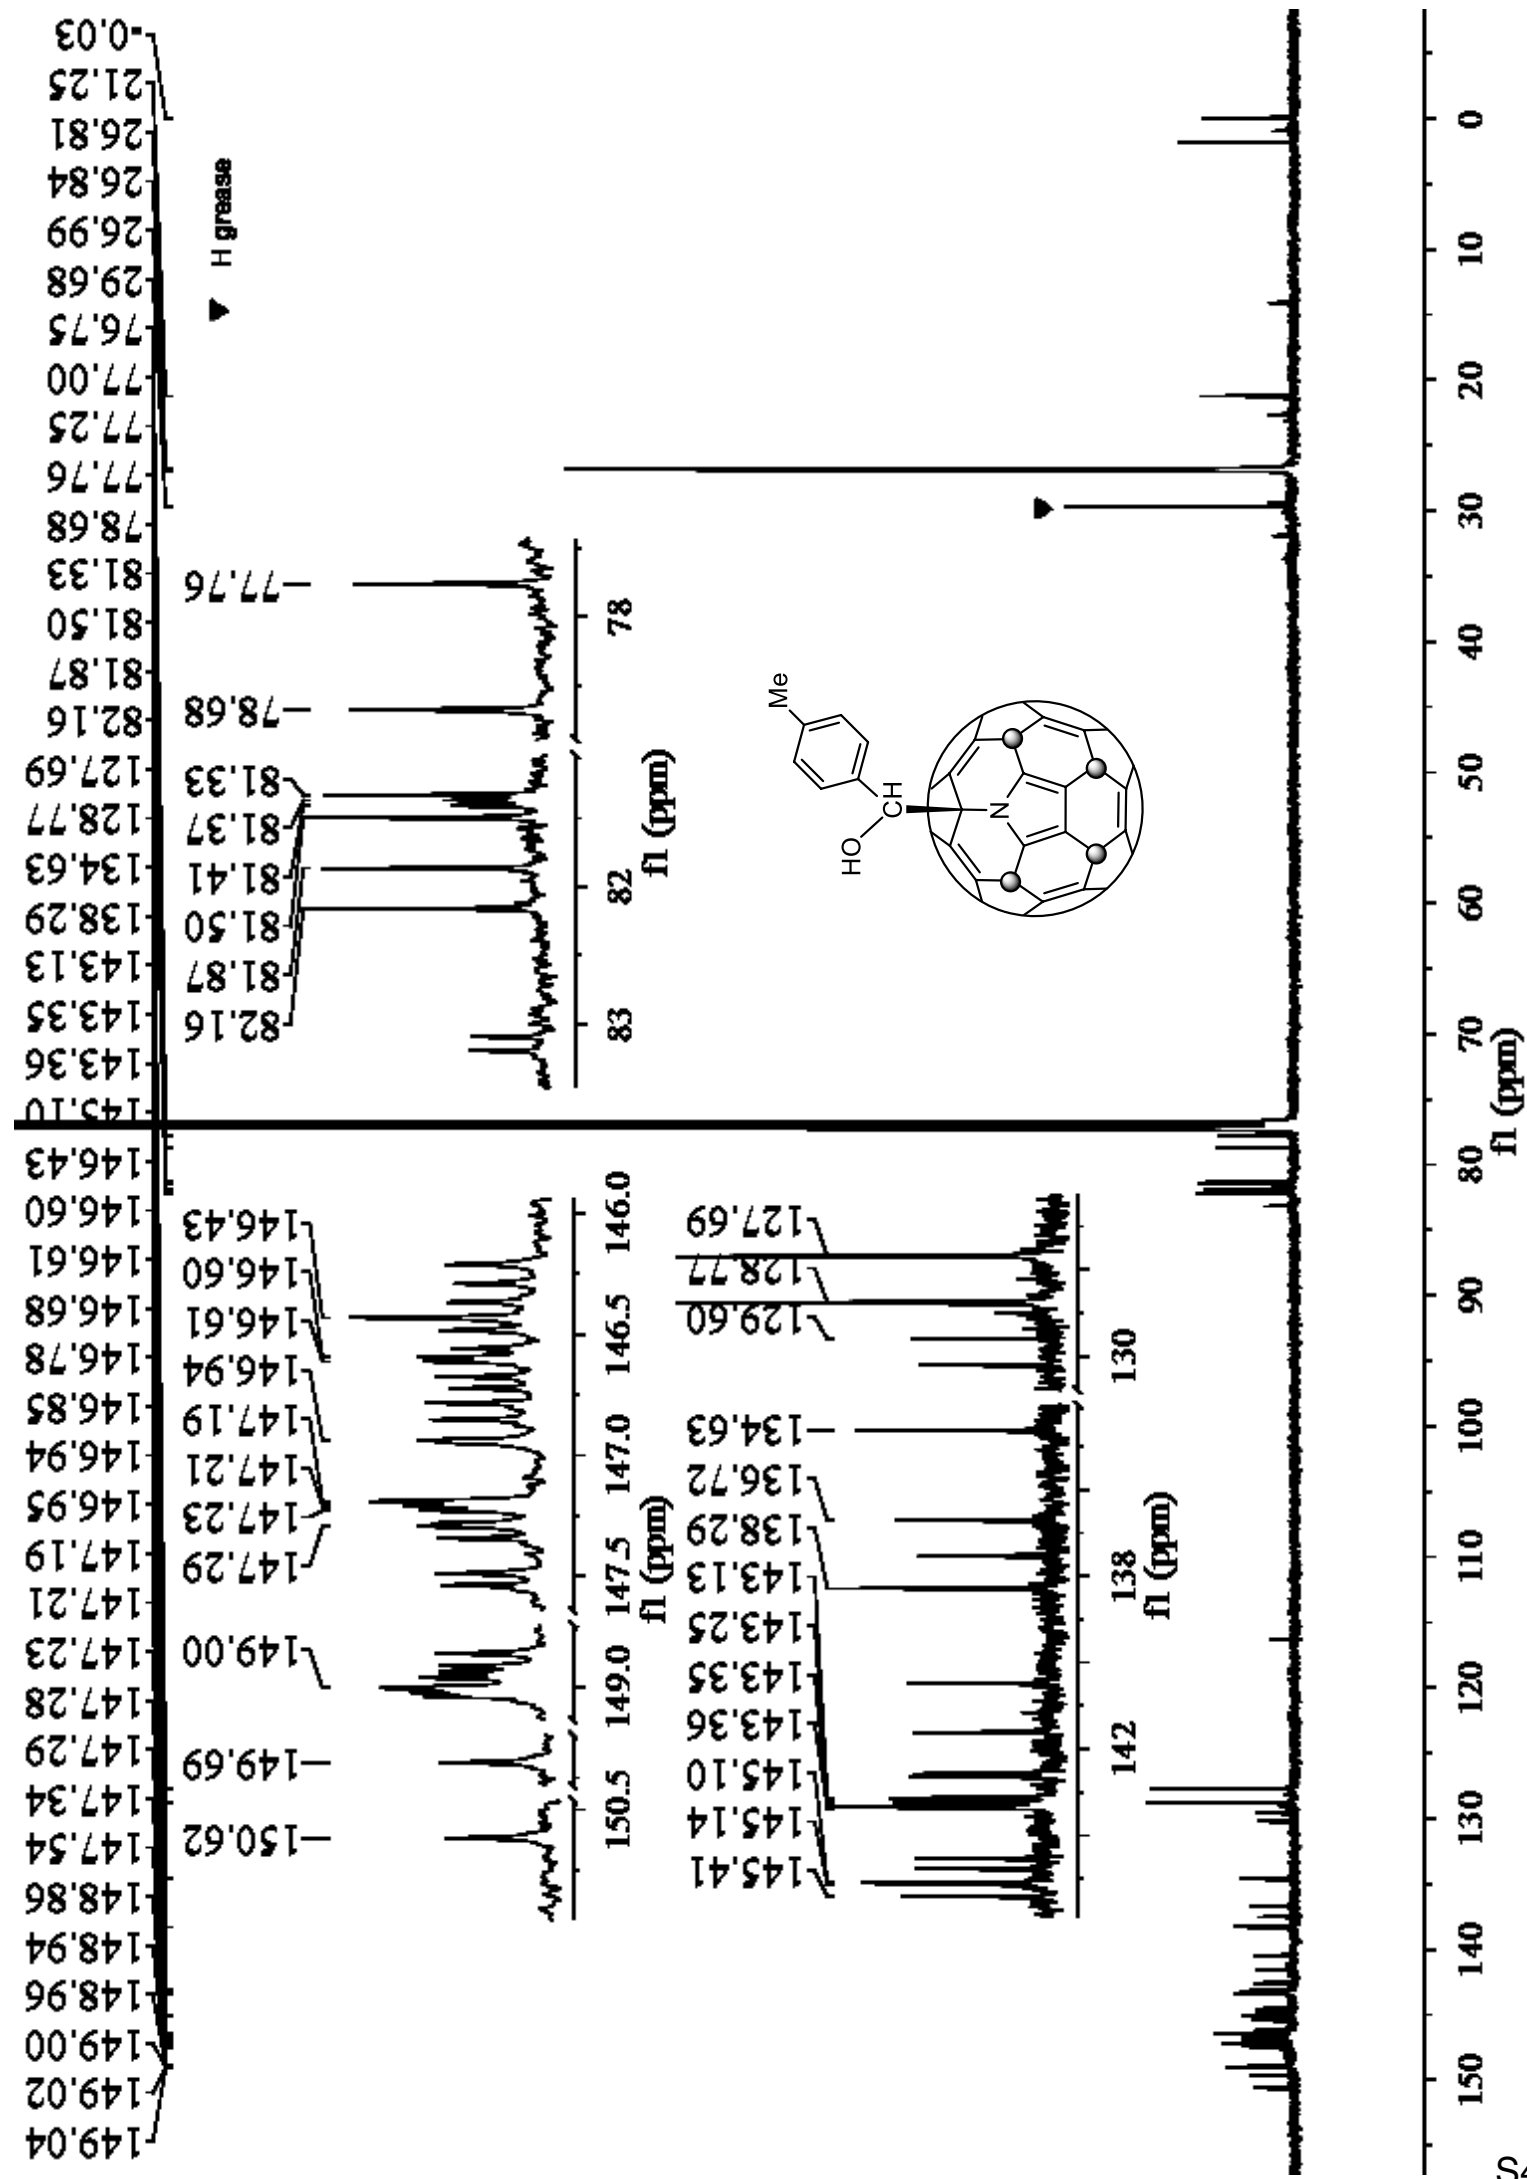

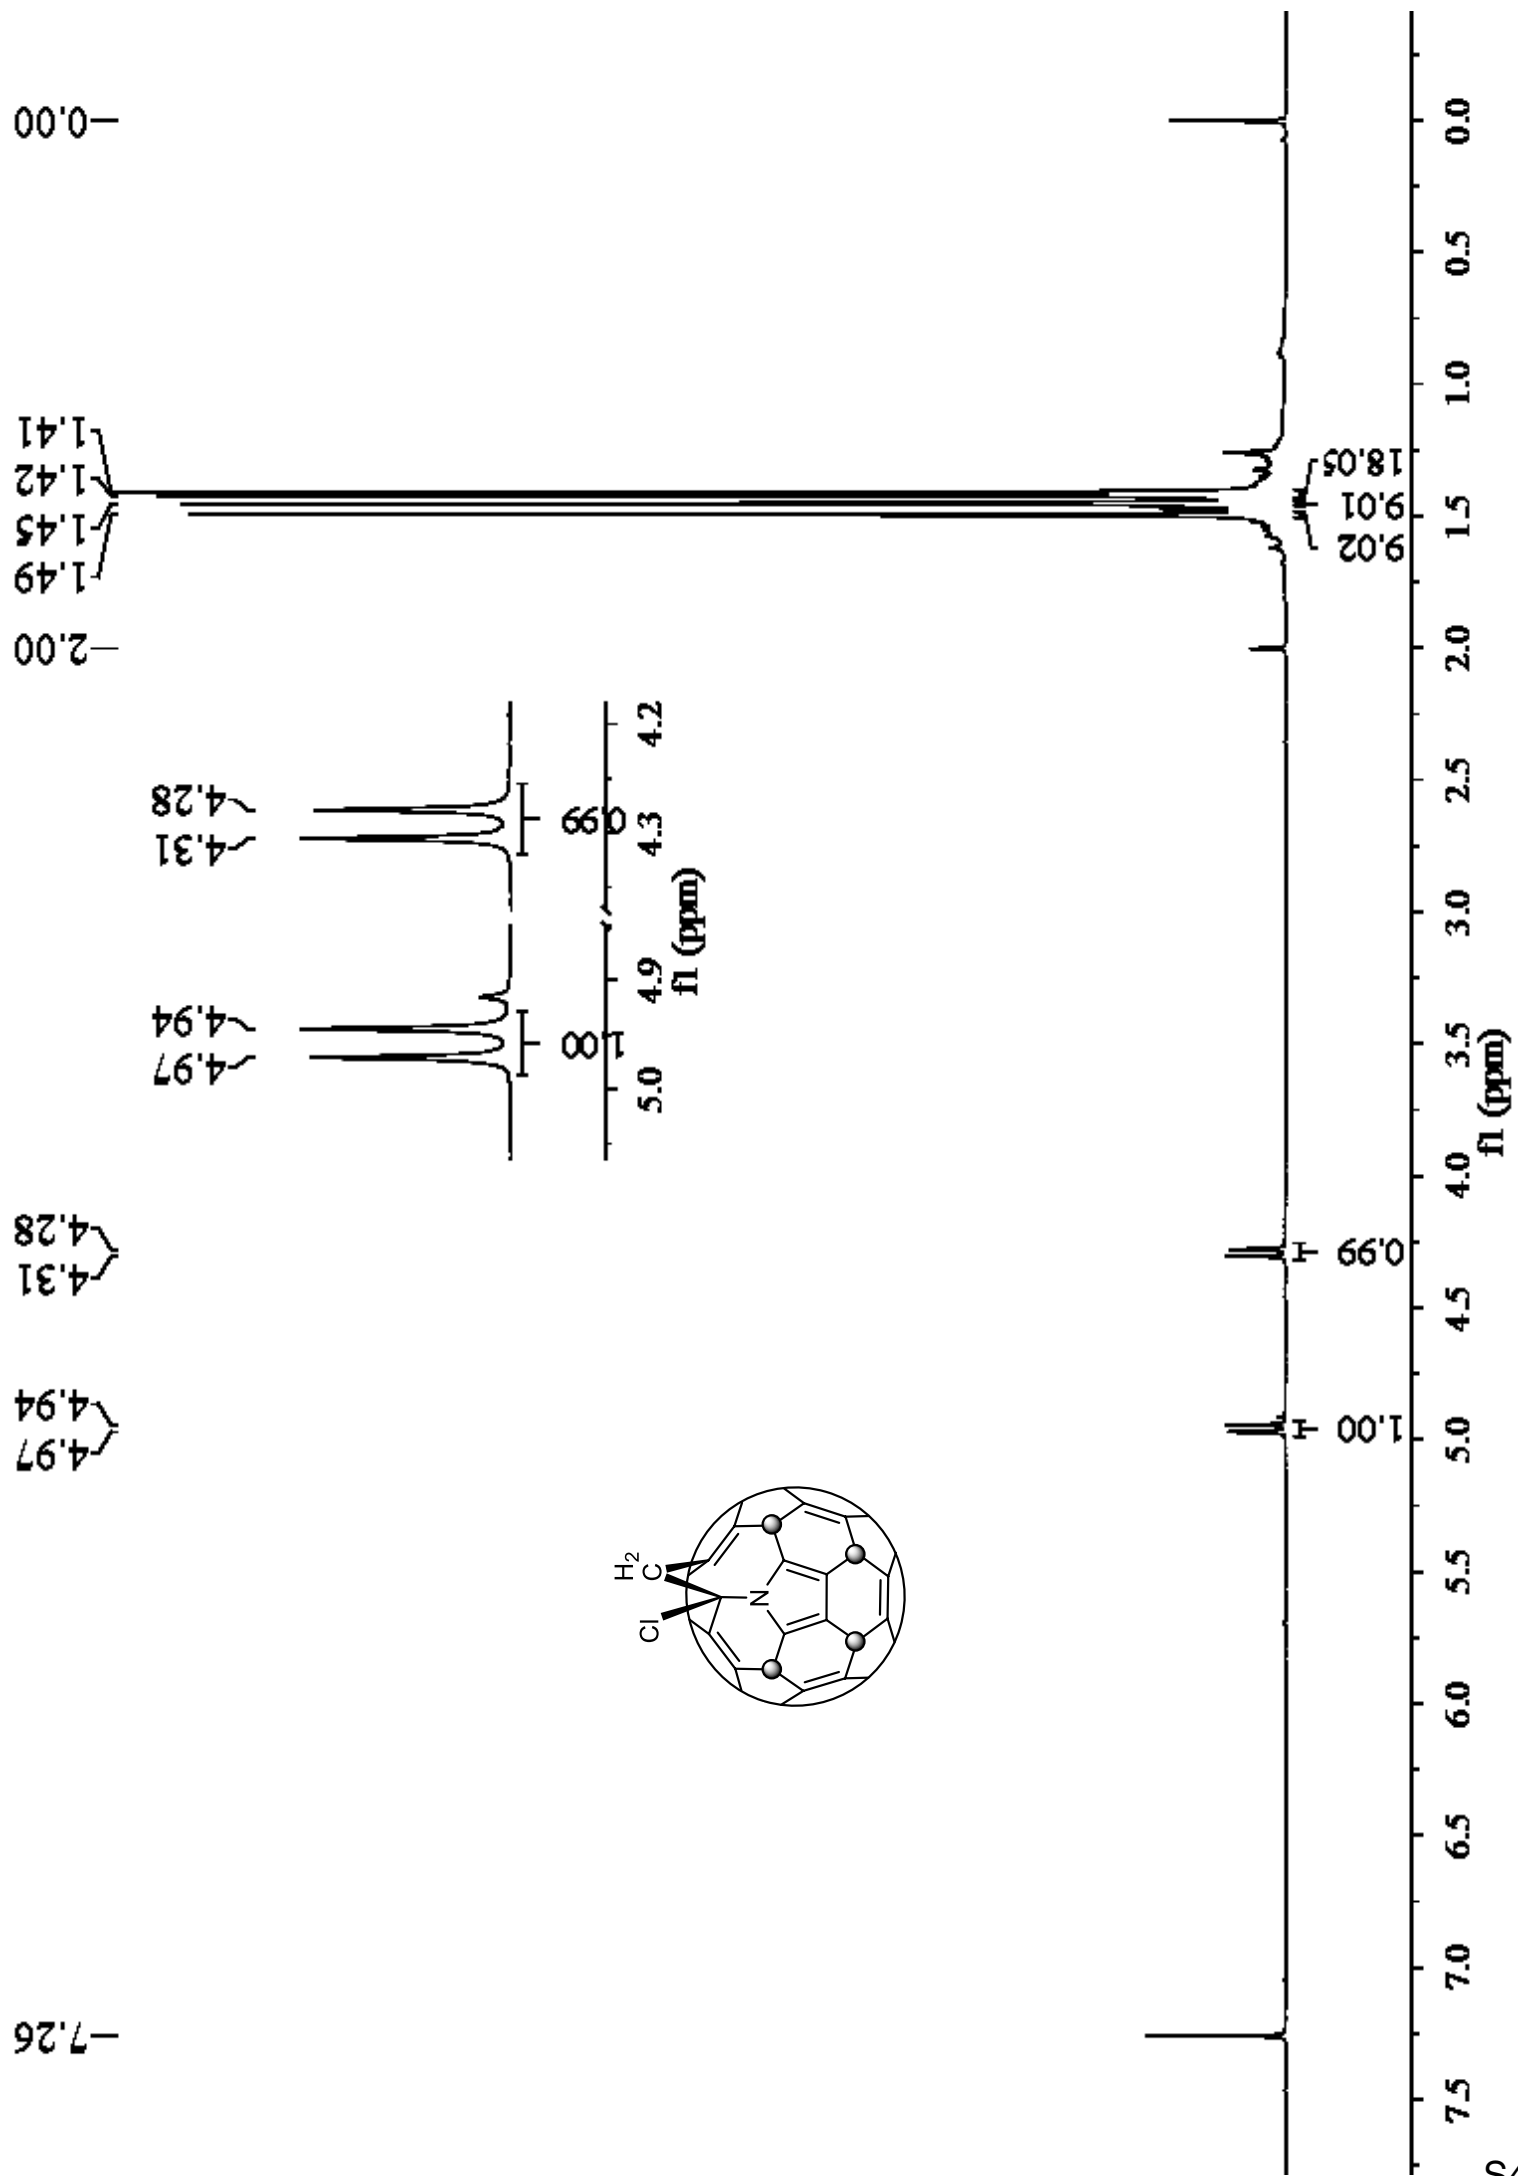

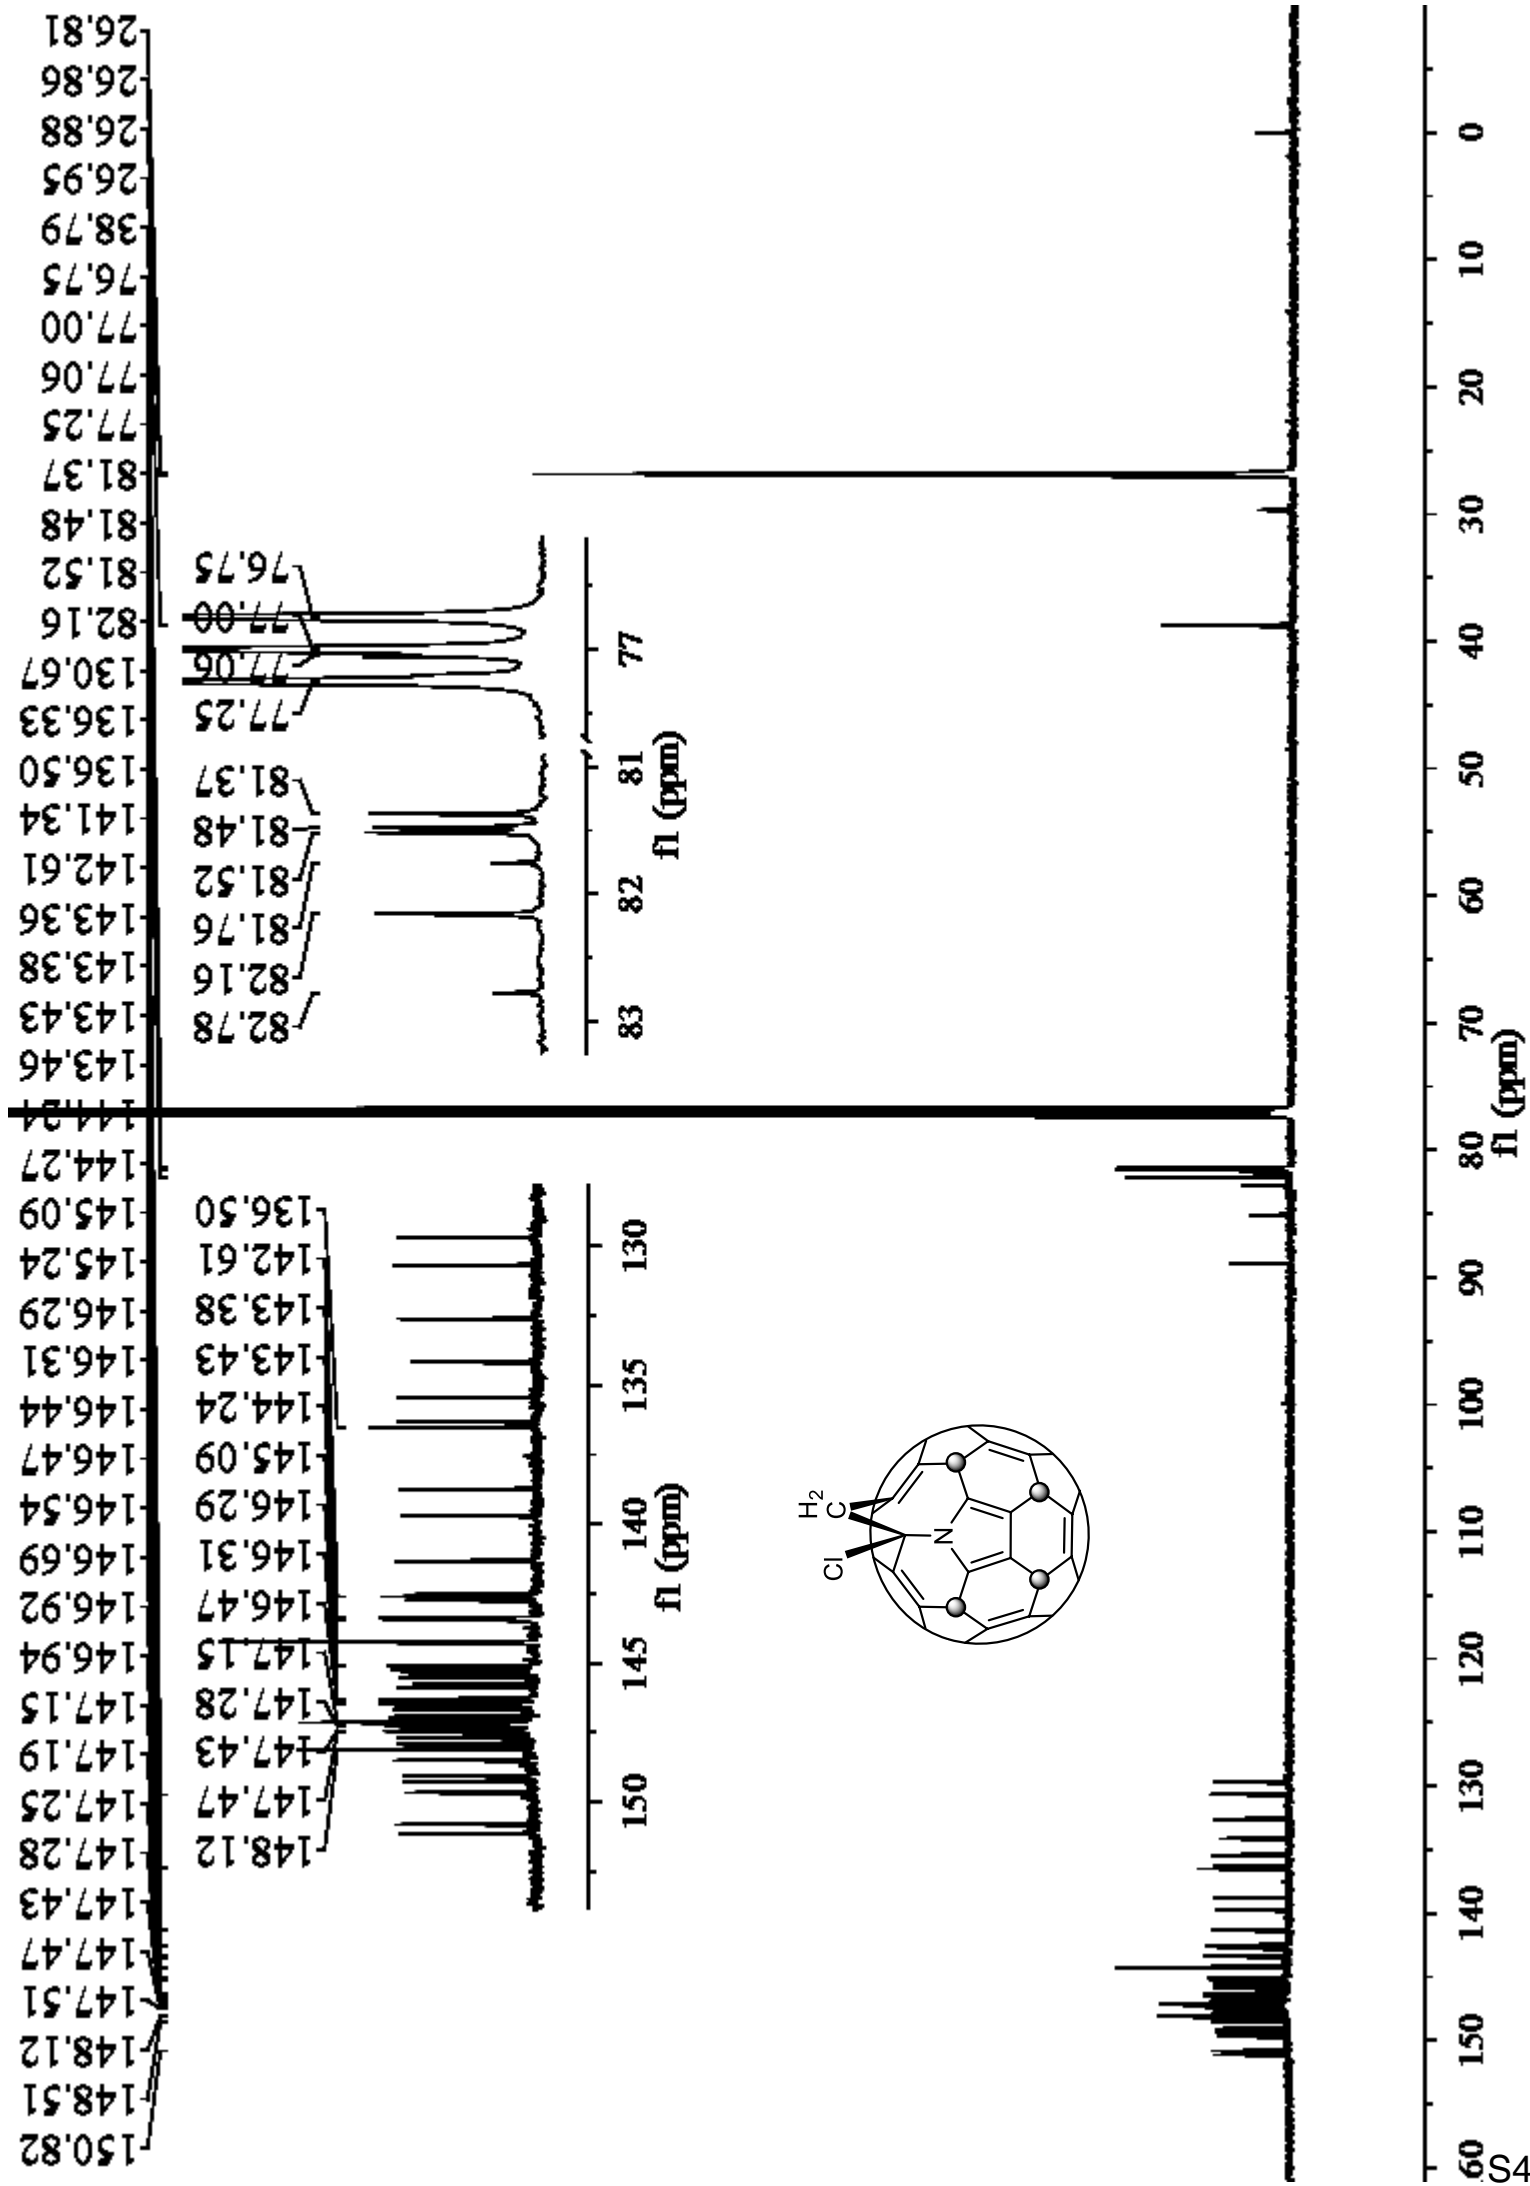

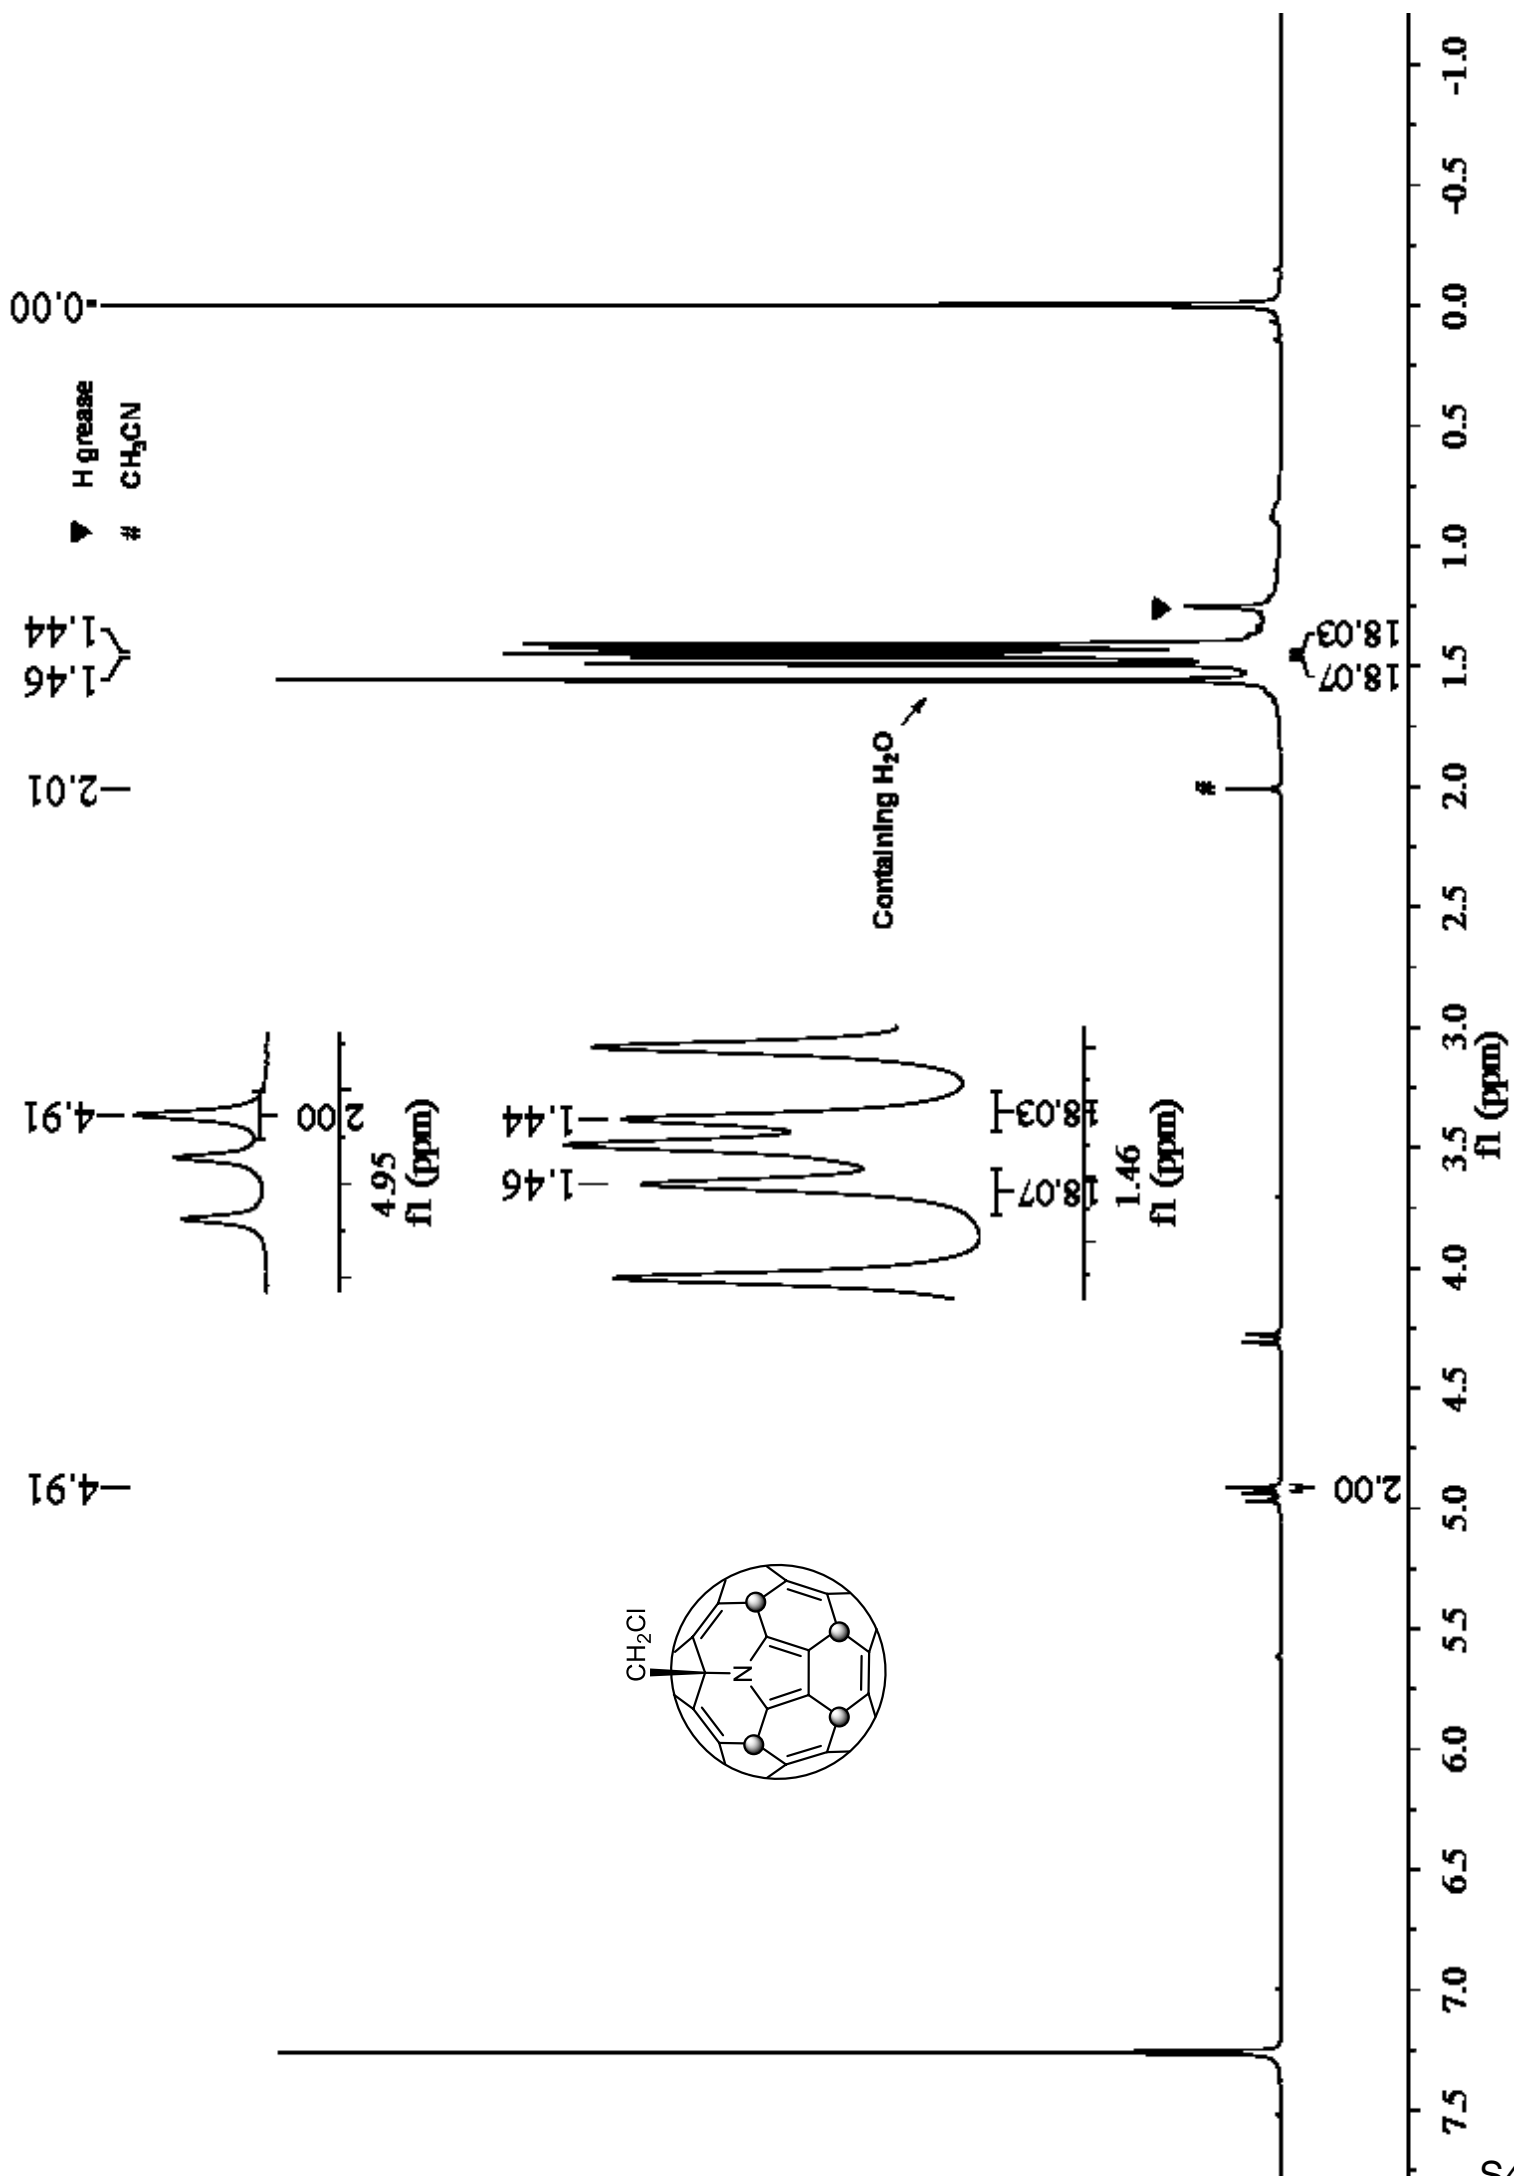

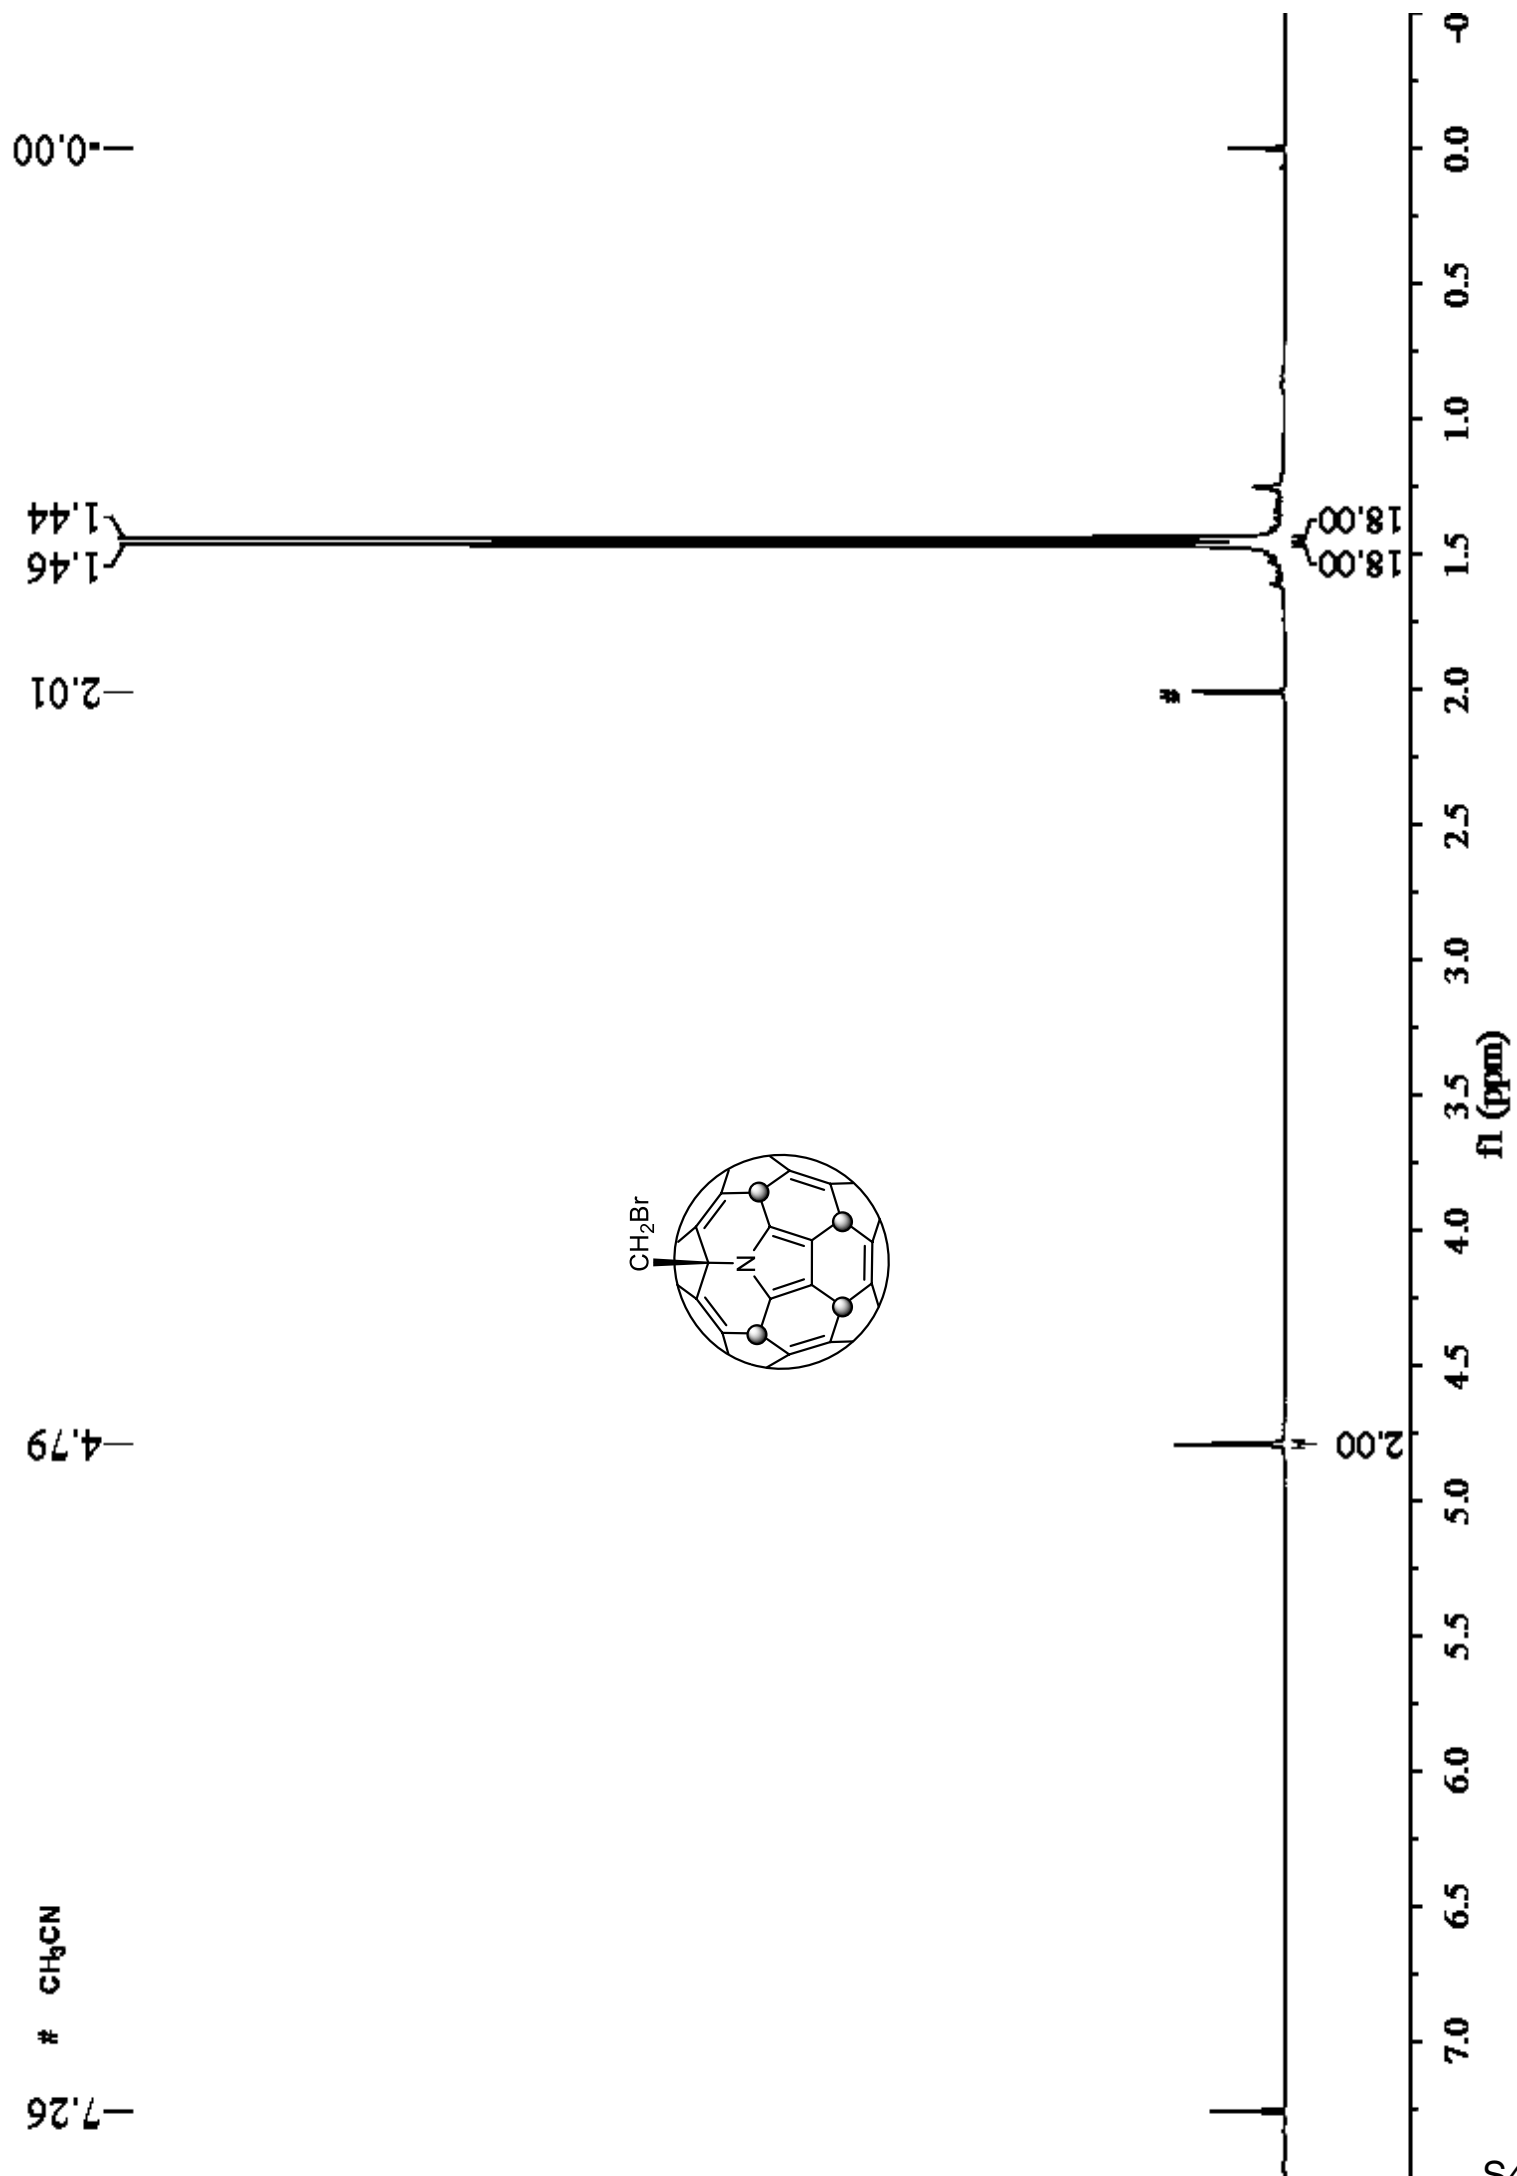

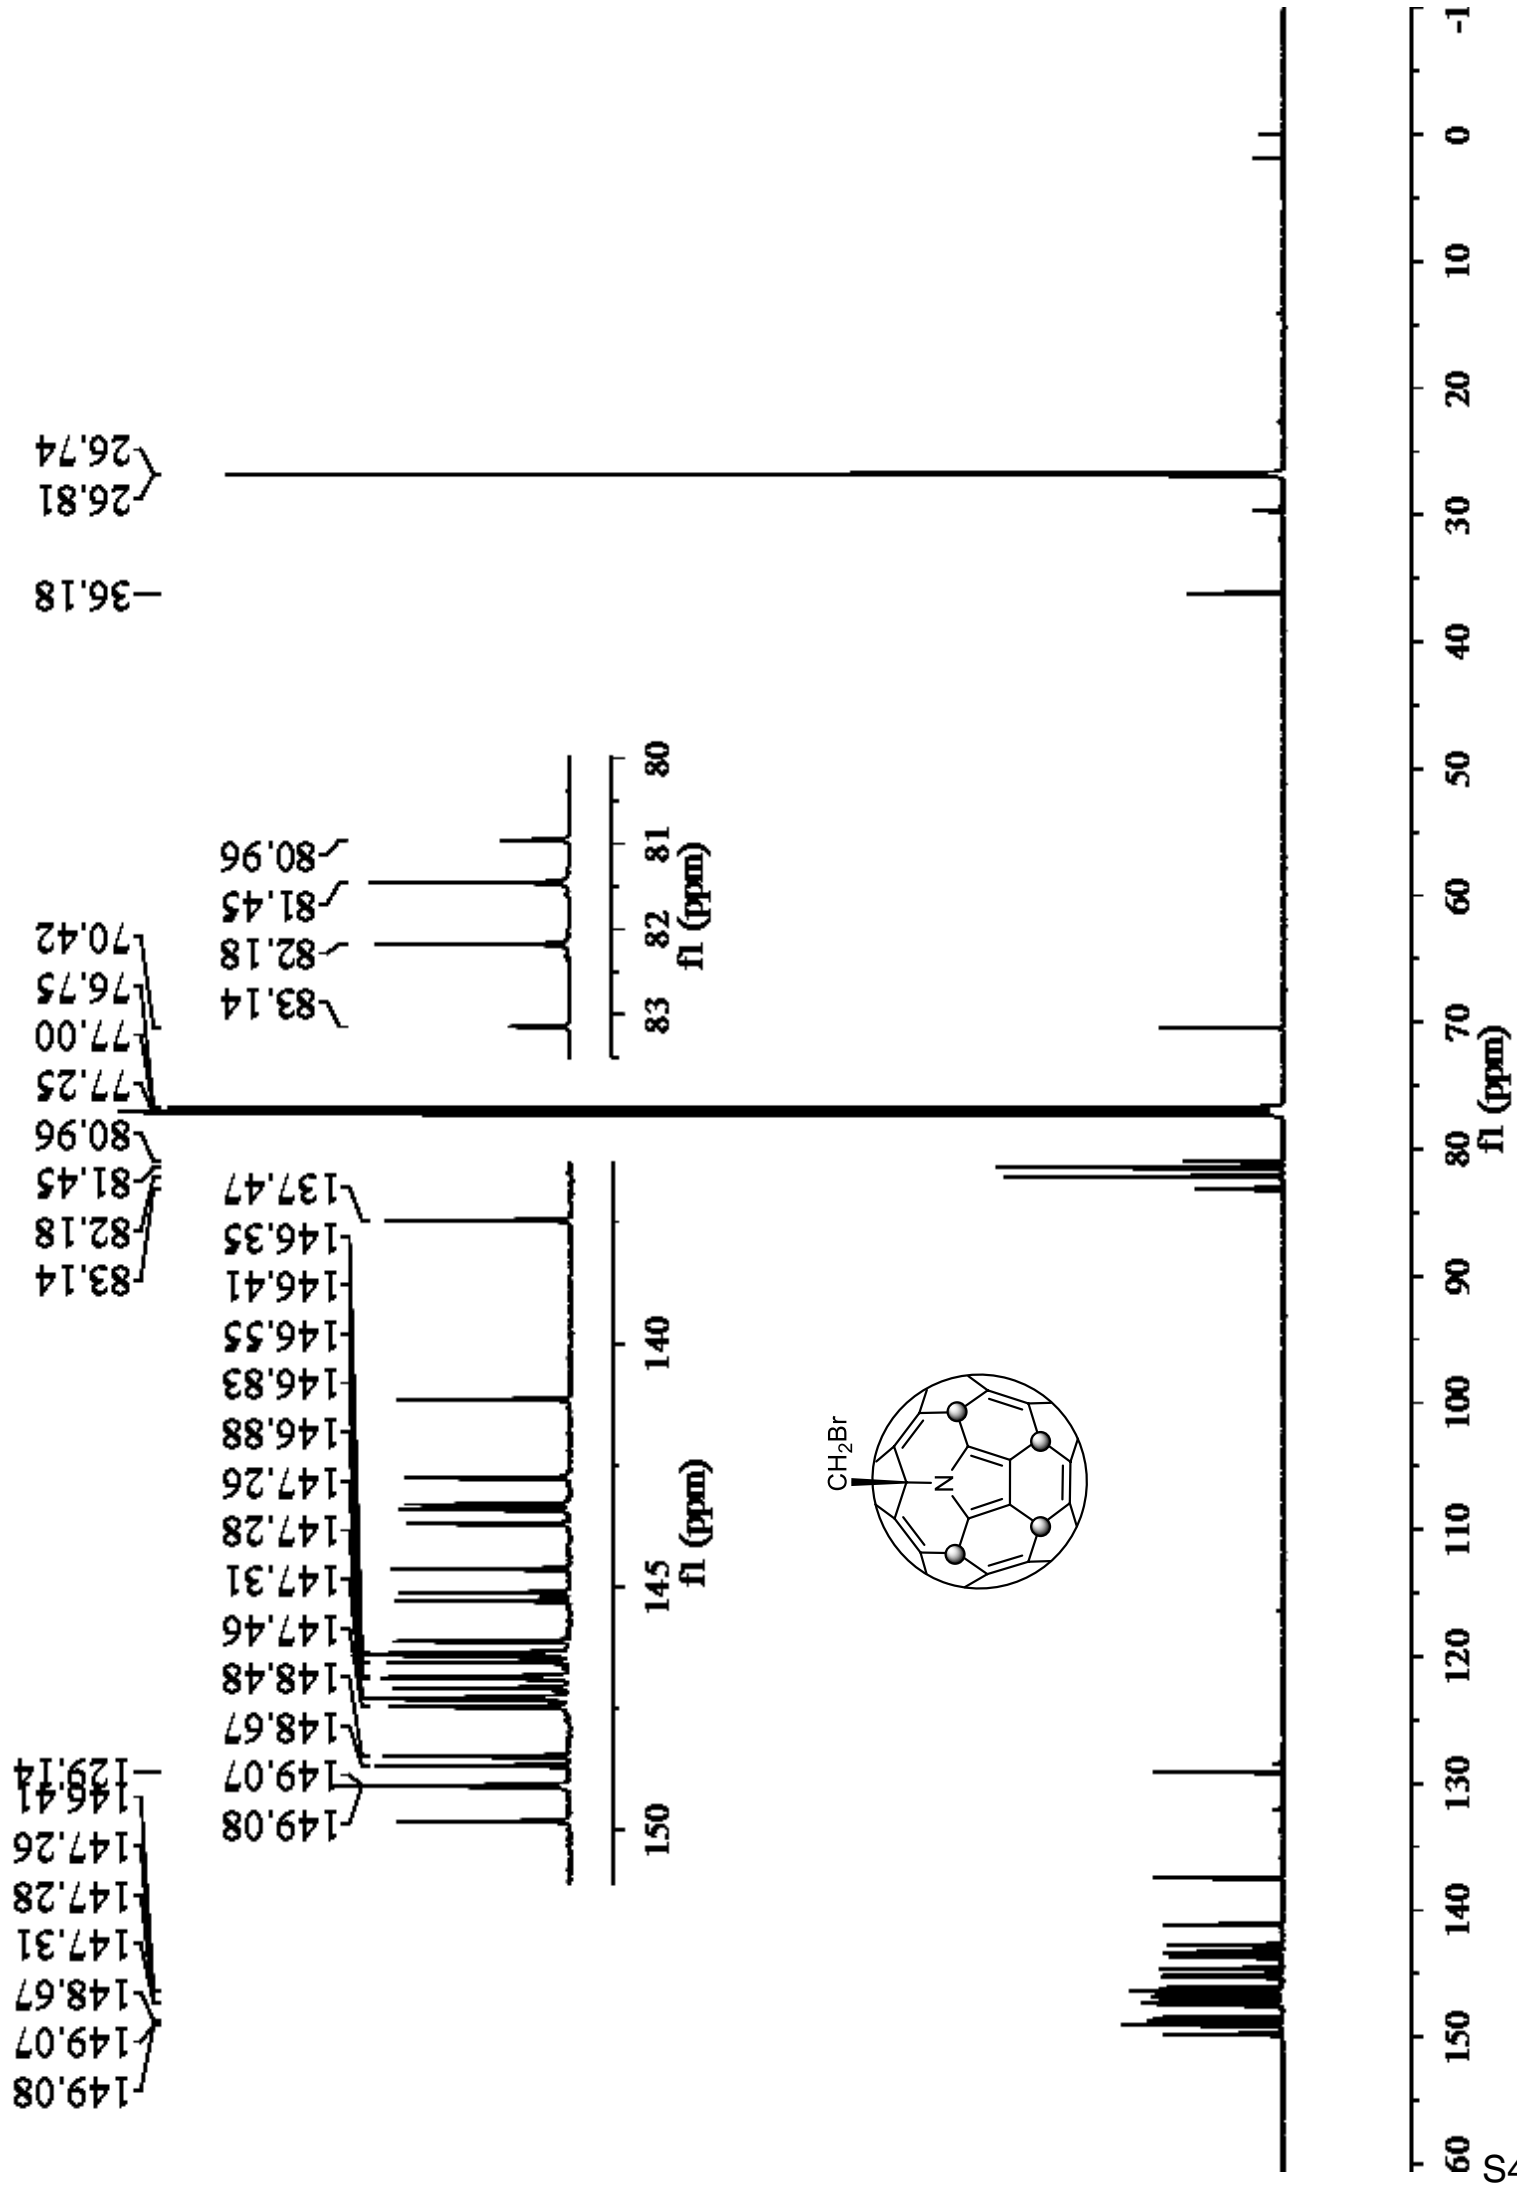

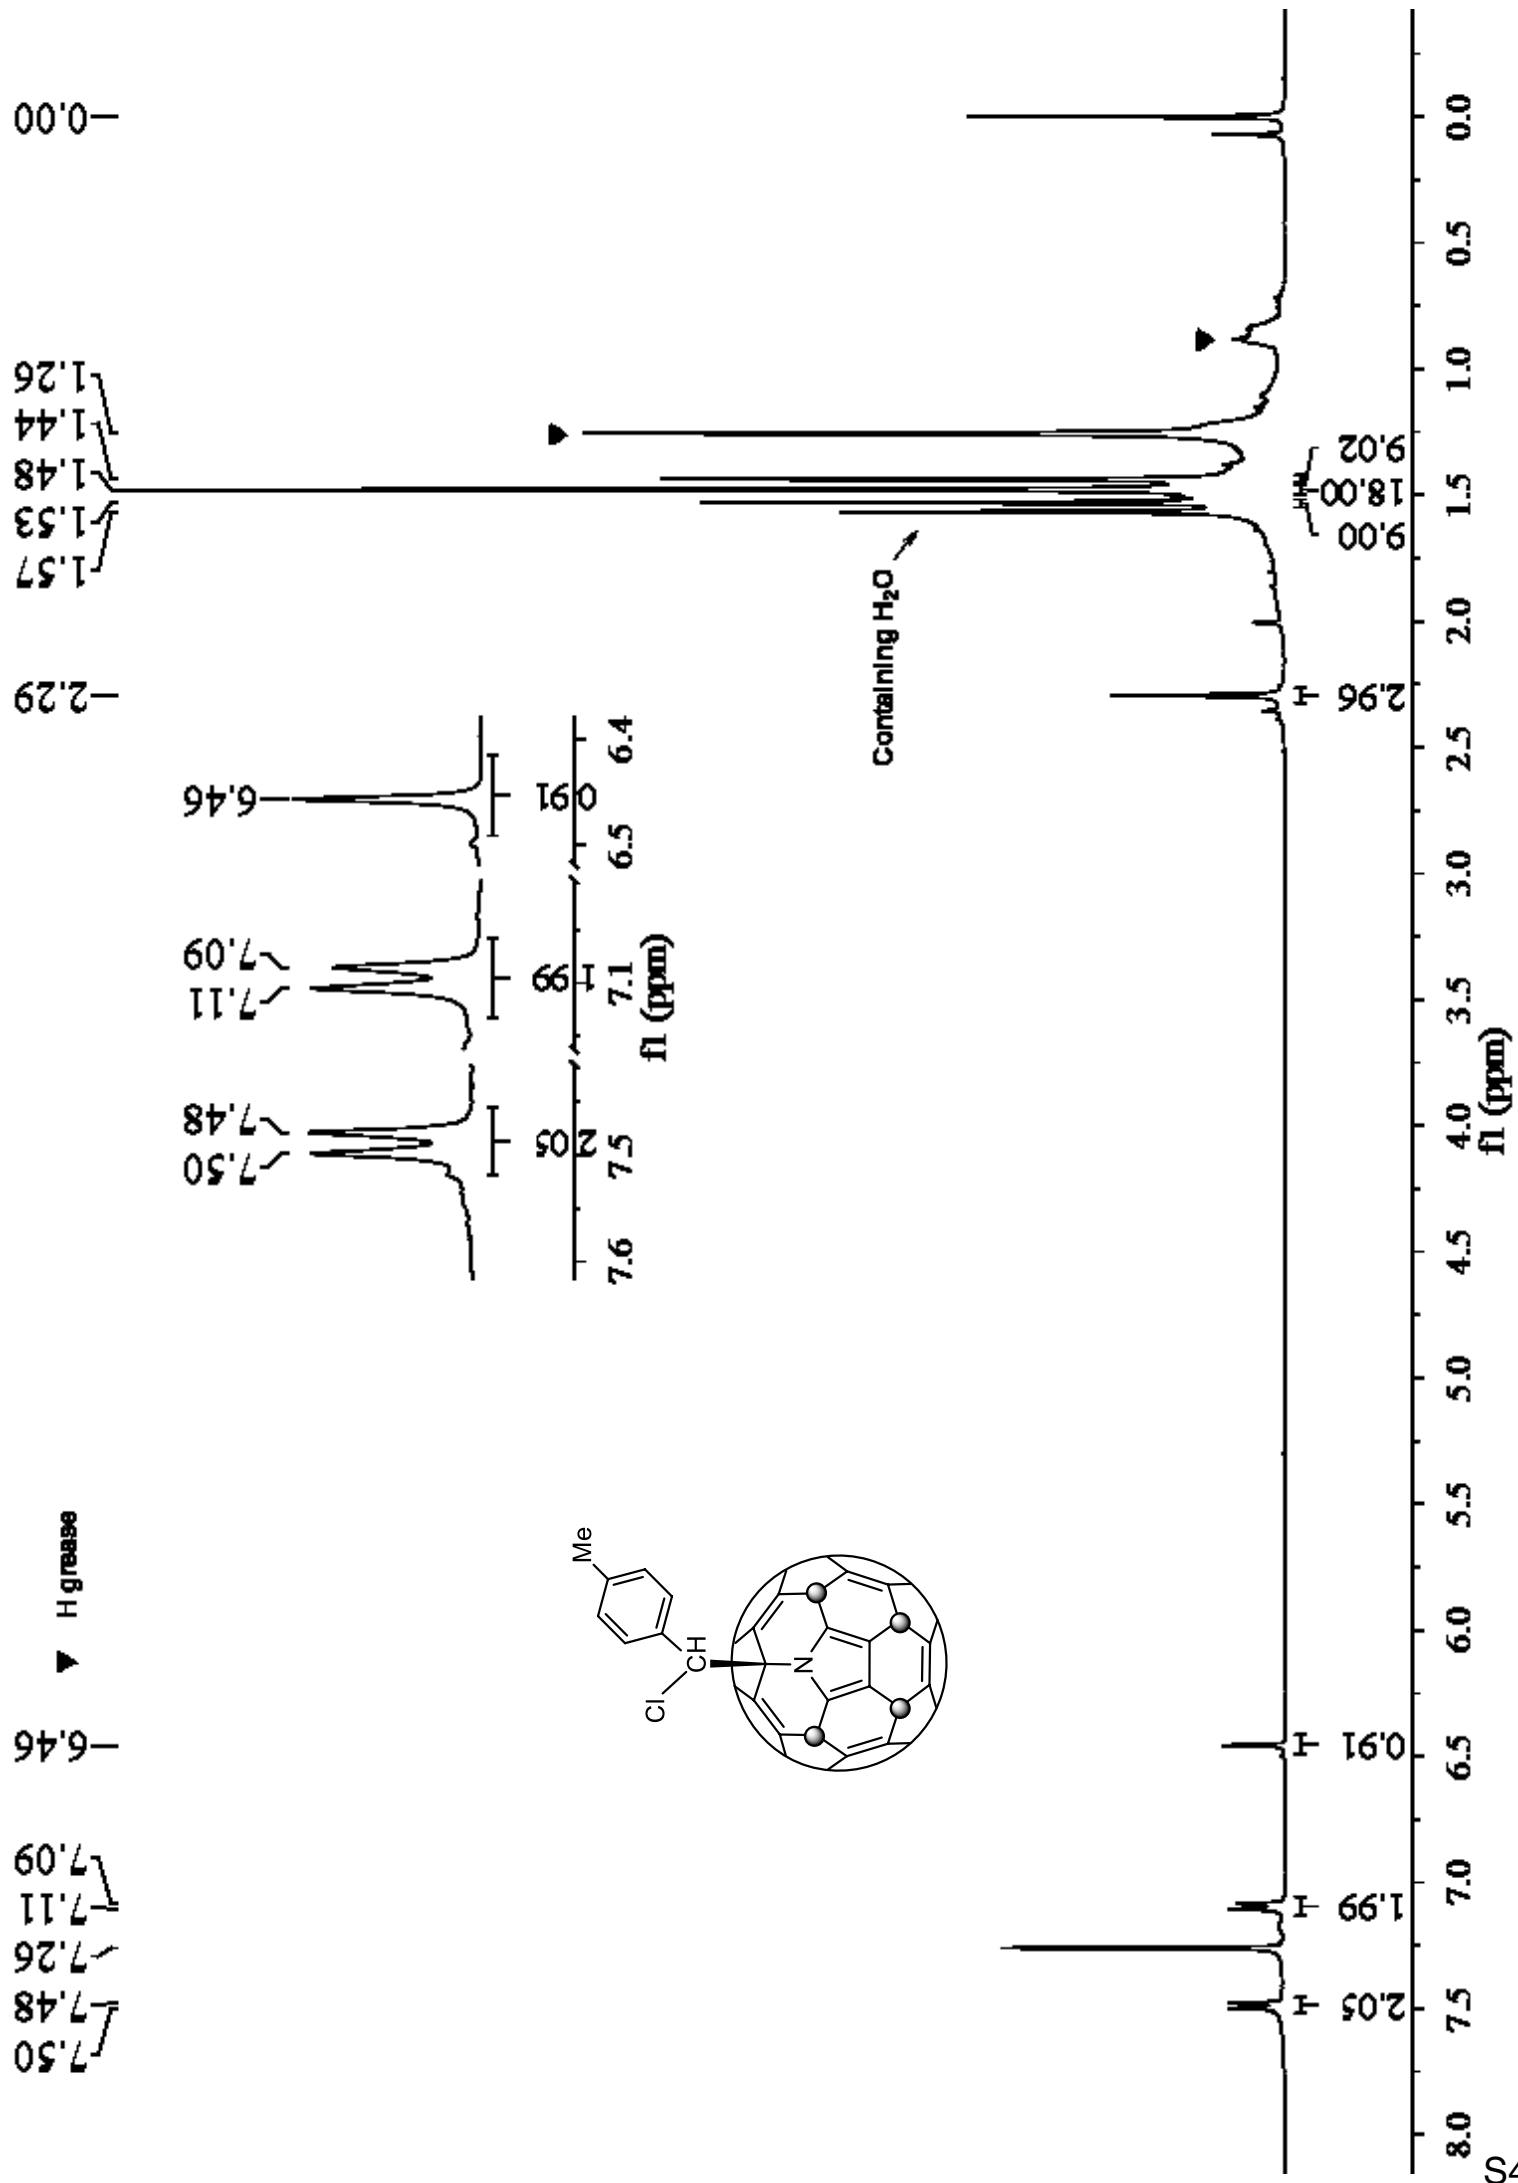

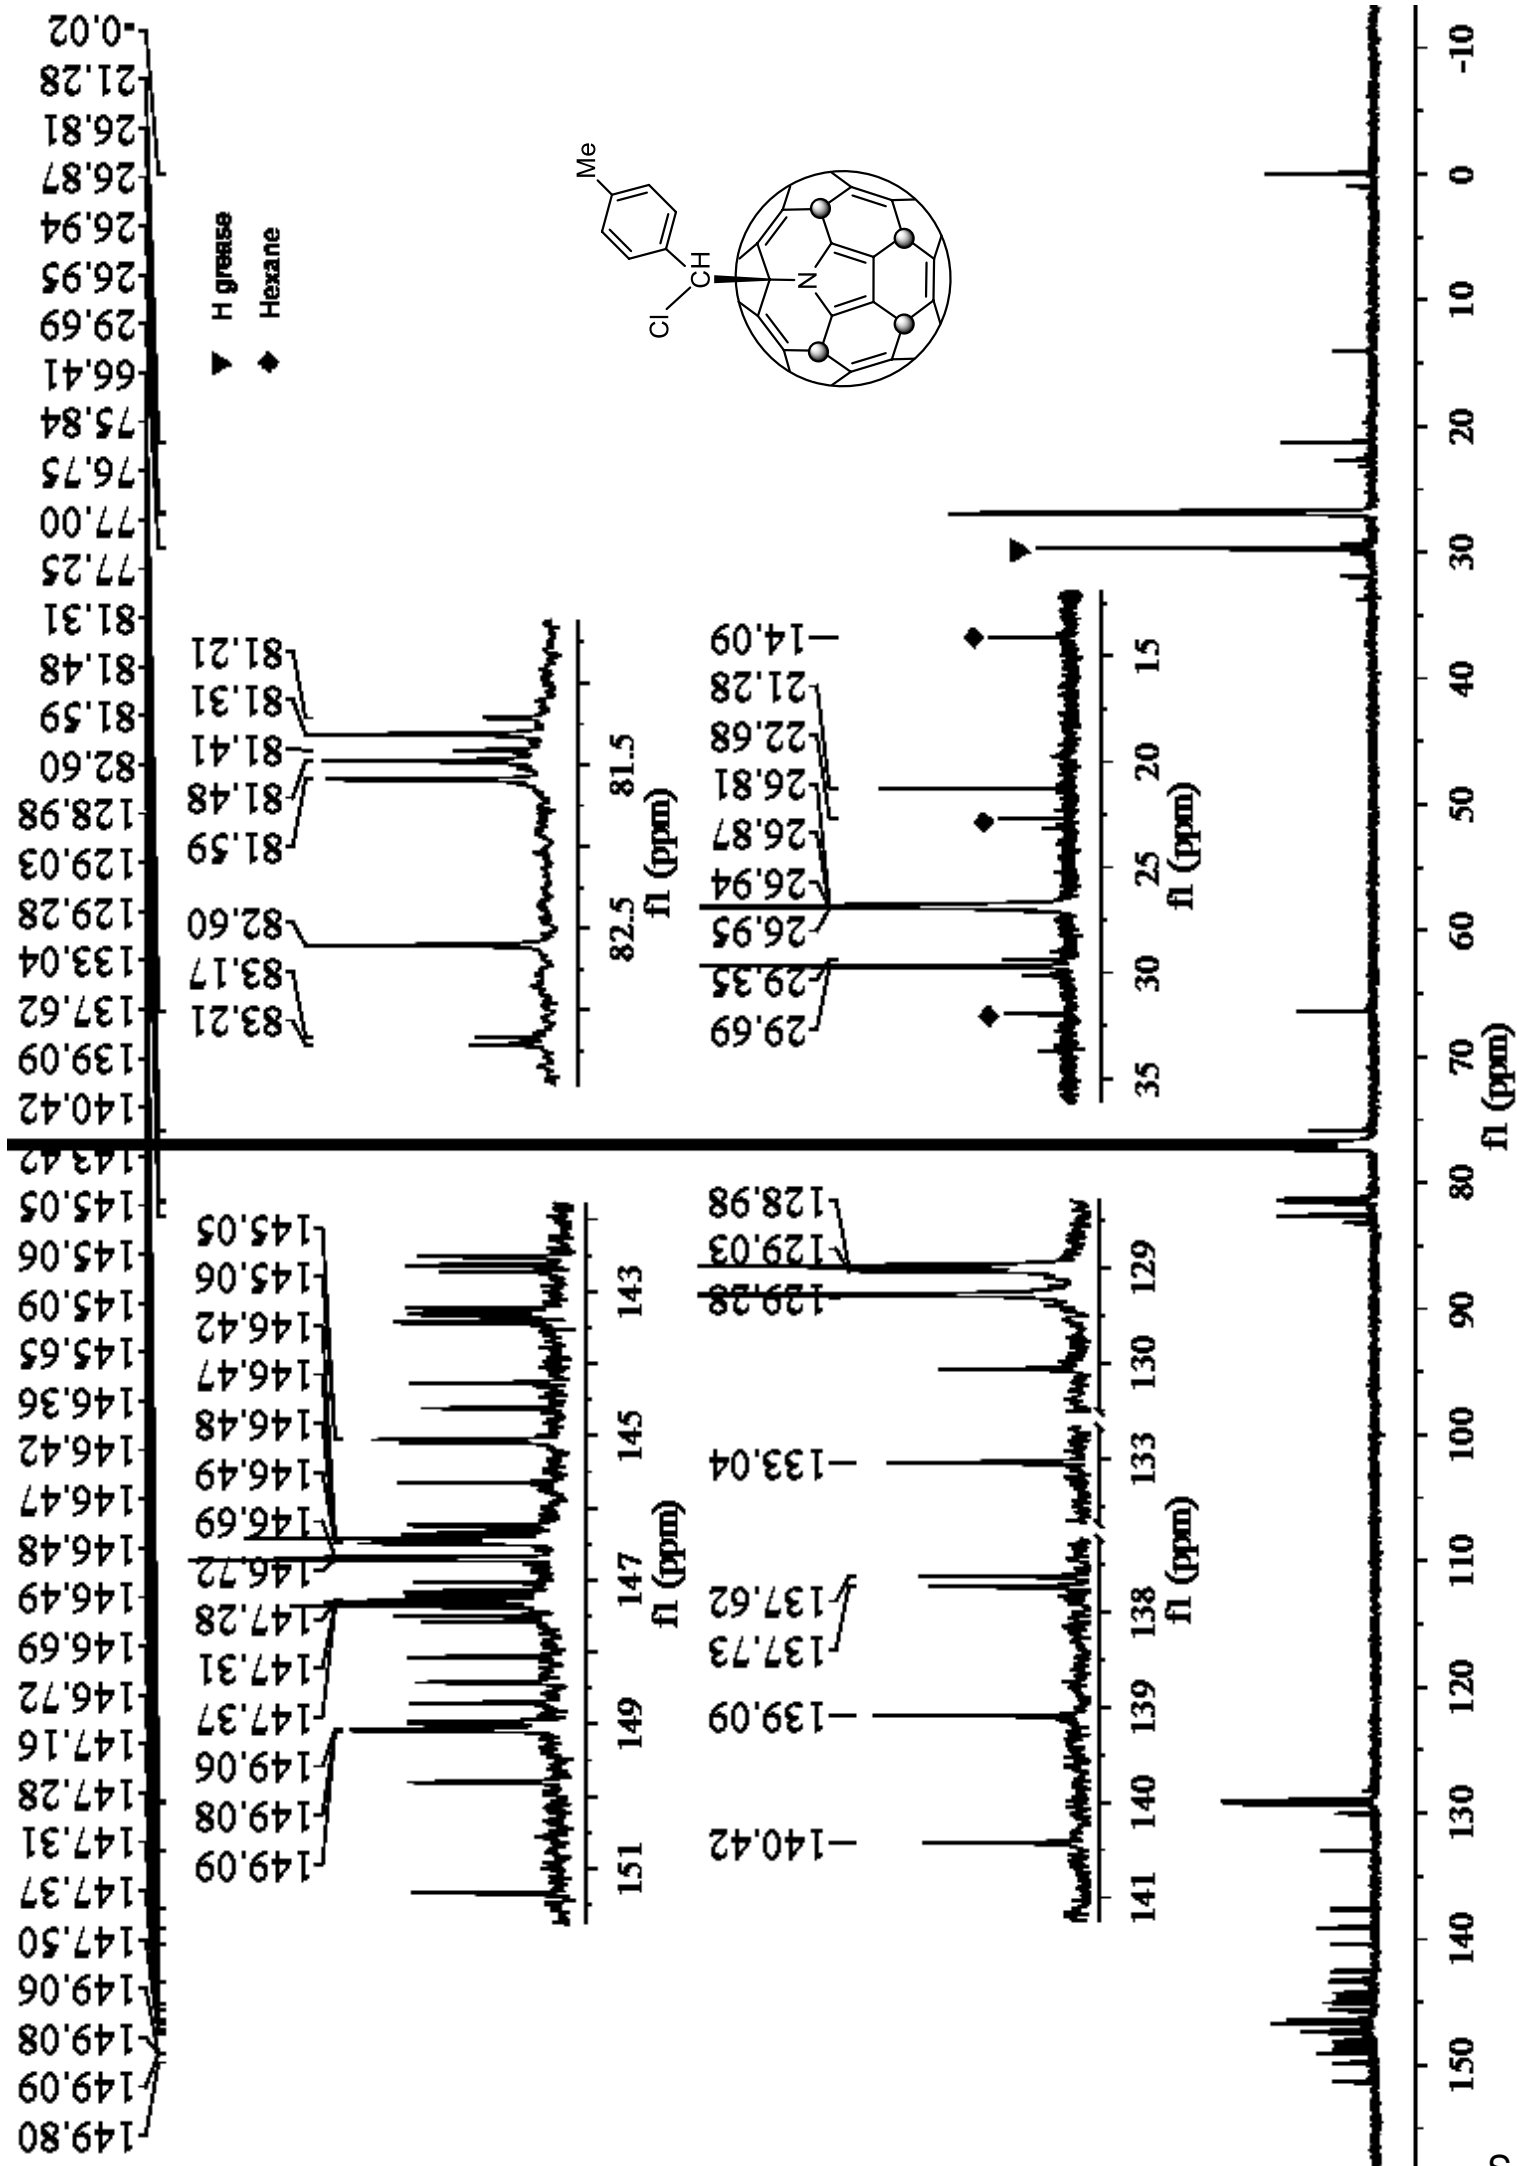



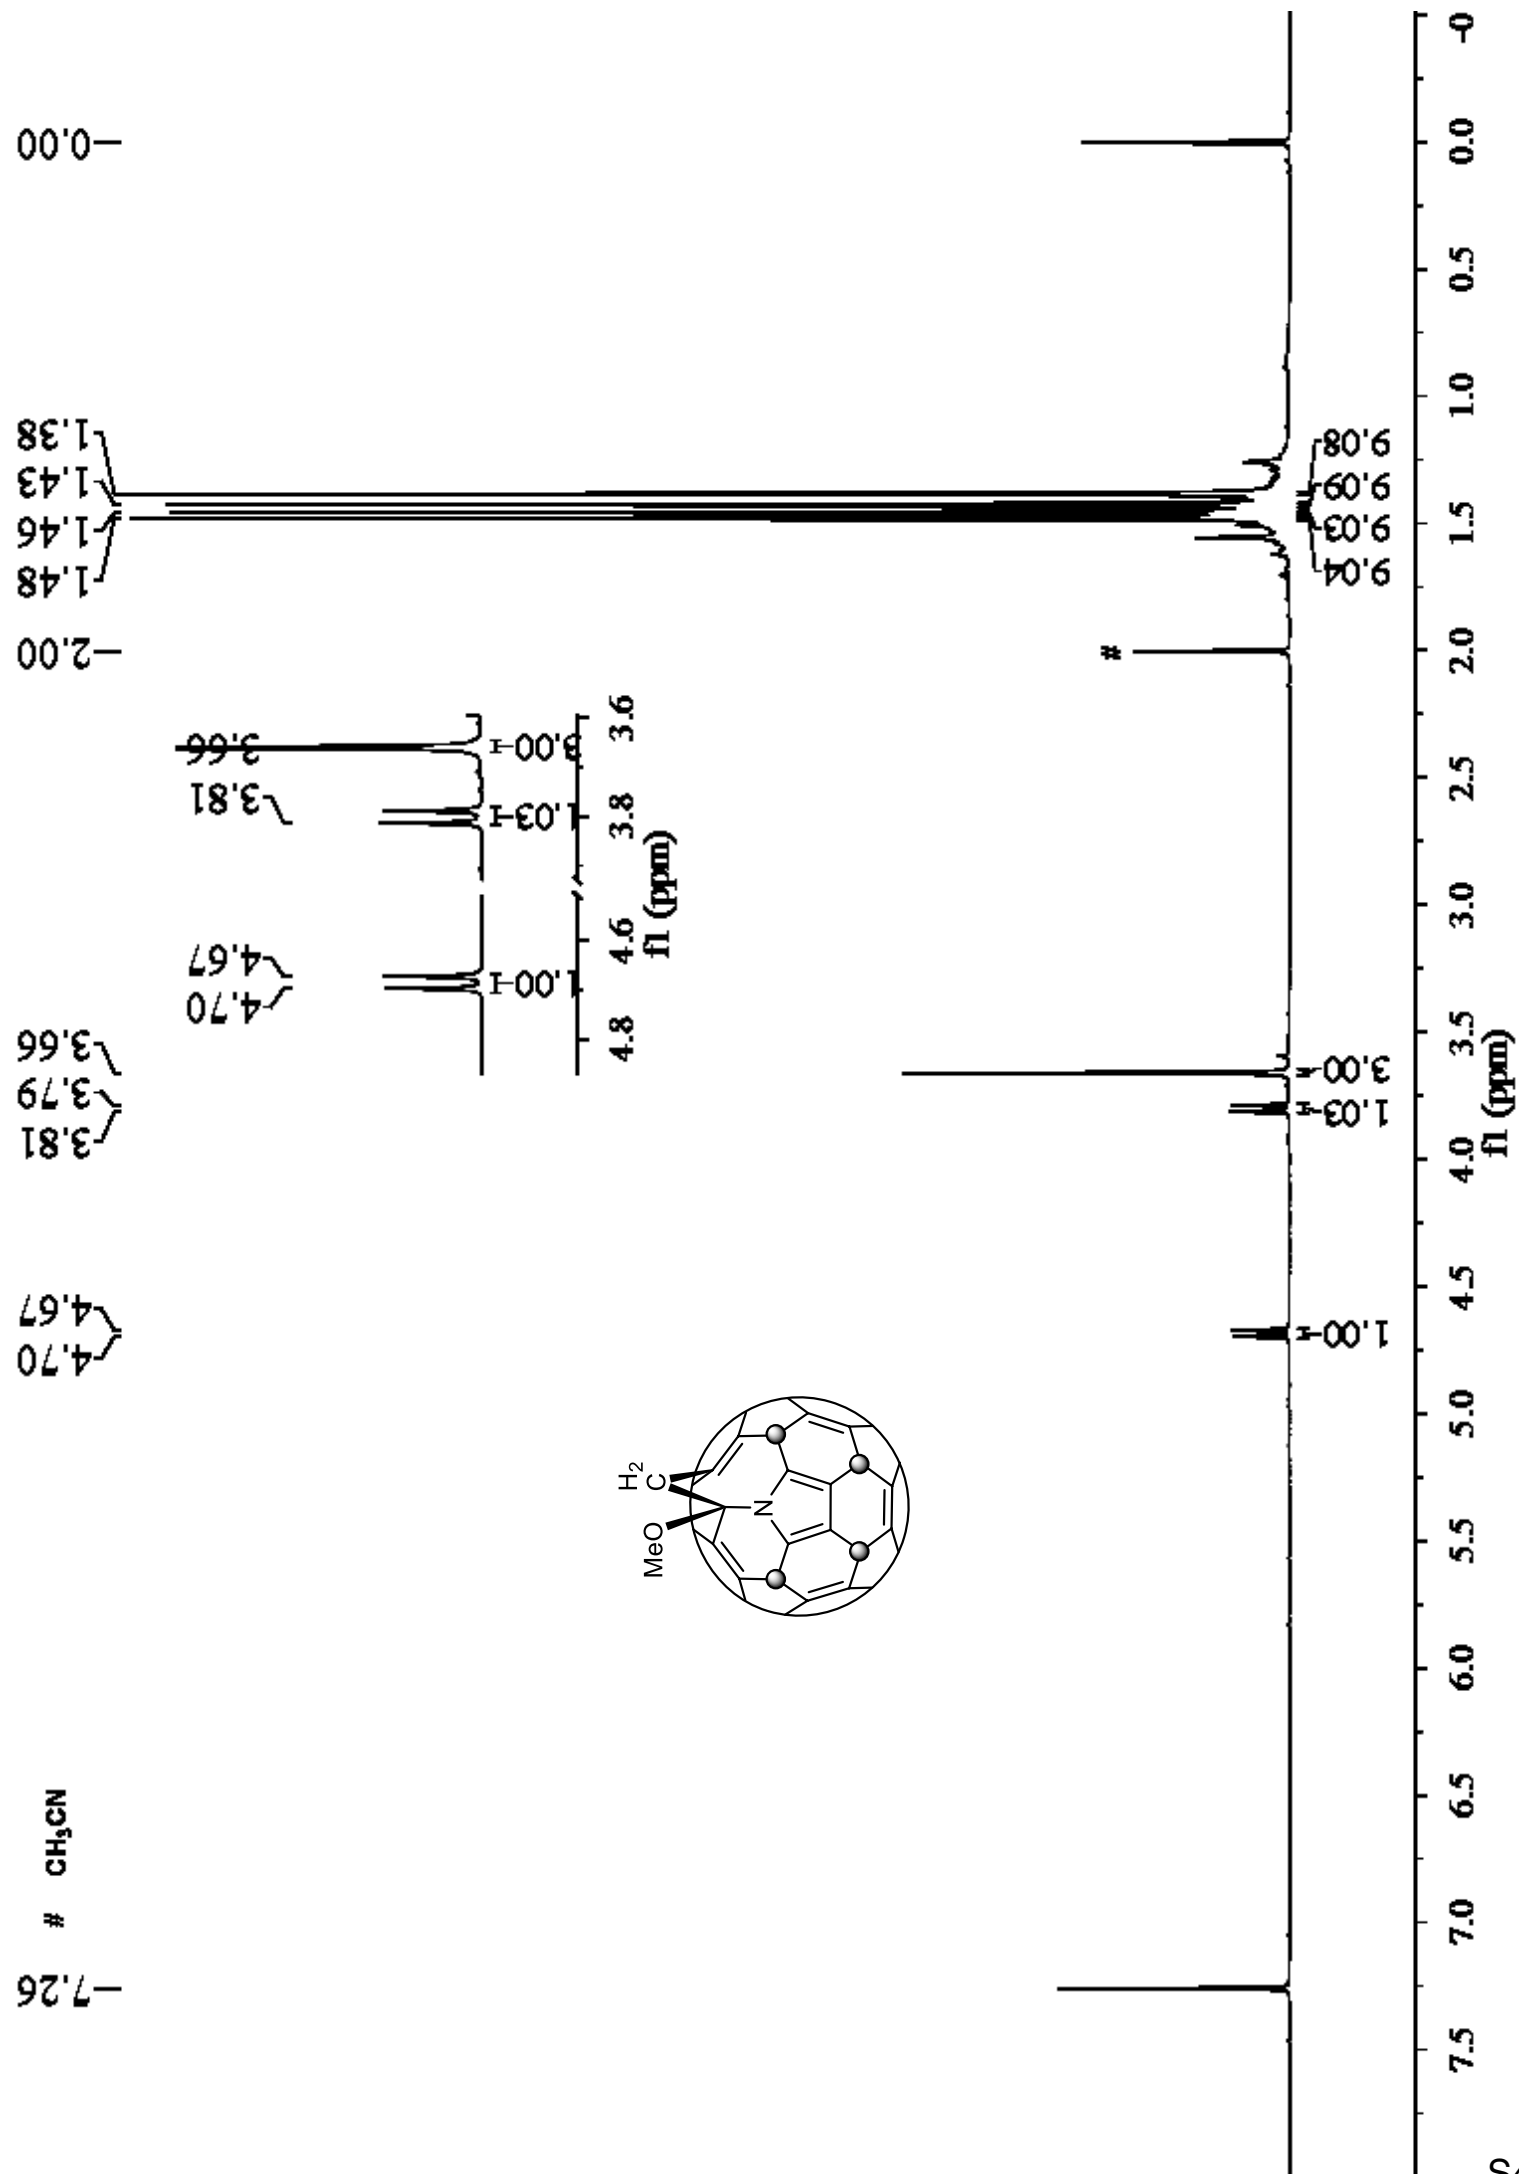

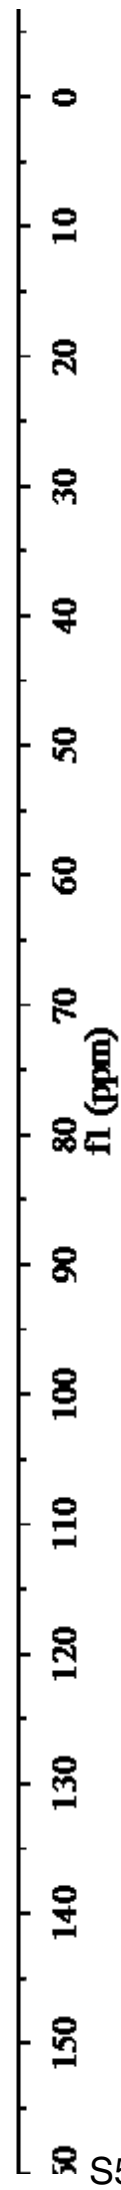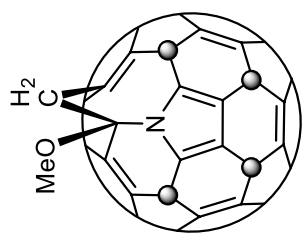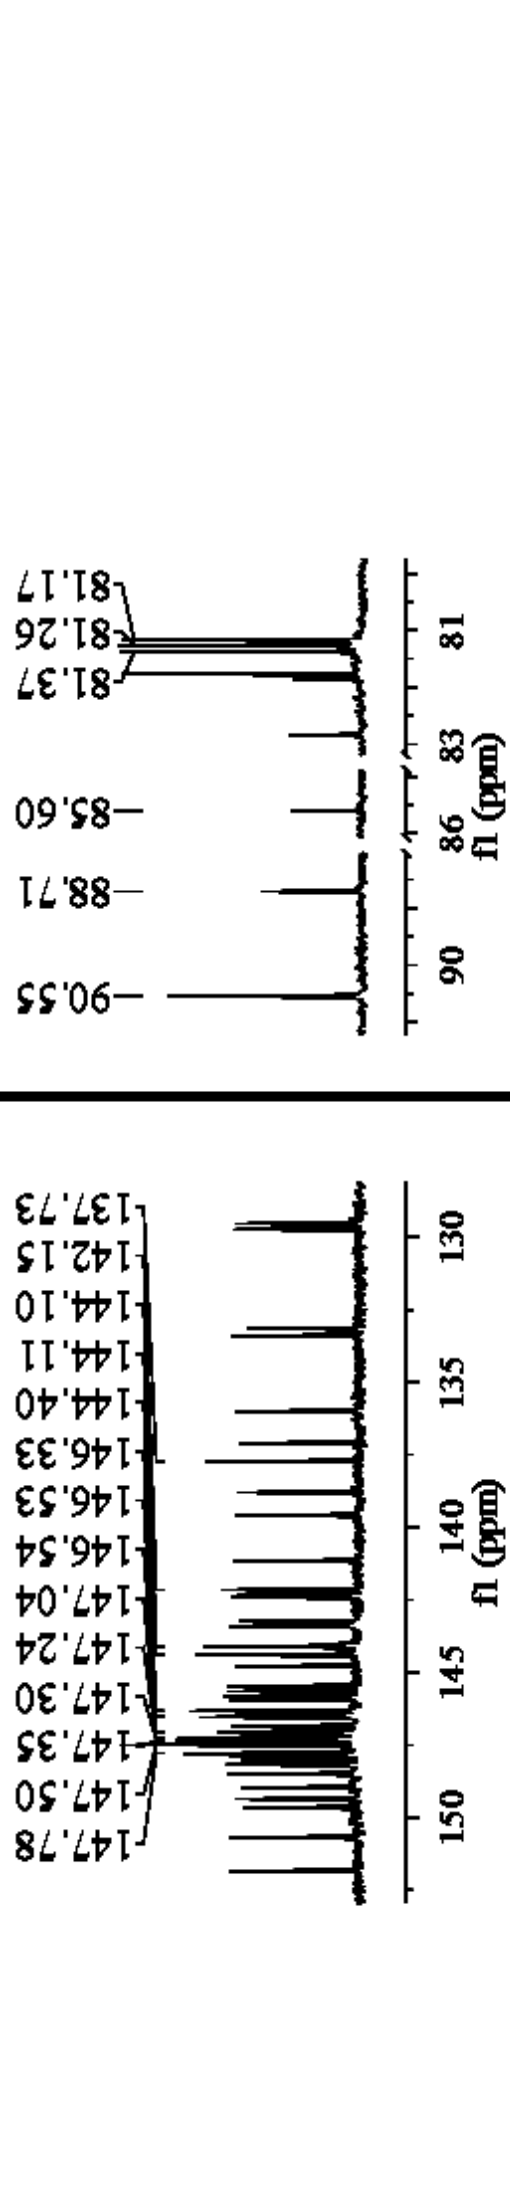

151.83  
148.49  
148.18  
147.86  
147.78  
147.50  
147.35  
147.30  
147.24  
147.12  
147.06  
147.04  
146.54  
146.53  
146.33  
146.33  
145.94  
145.83  
145.65  
145.47  
144.78  
144.40  
144.11  
144.10  
144.10  
144.04  
143.40  
143.38  
142.15  
137.73  
136.00  
133.41  
90.55  
81.37  
81.26  
81.17  
81.17  
77.25  
77.00  
76.75  
51.01  
31.04  
26.88  
26.86  
26.82  
26.75

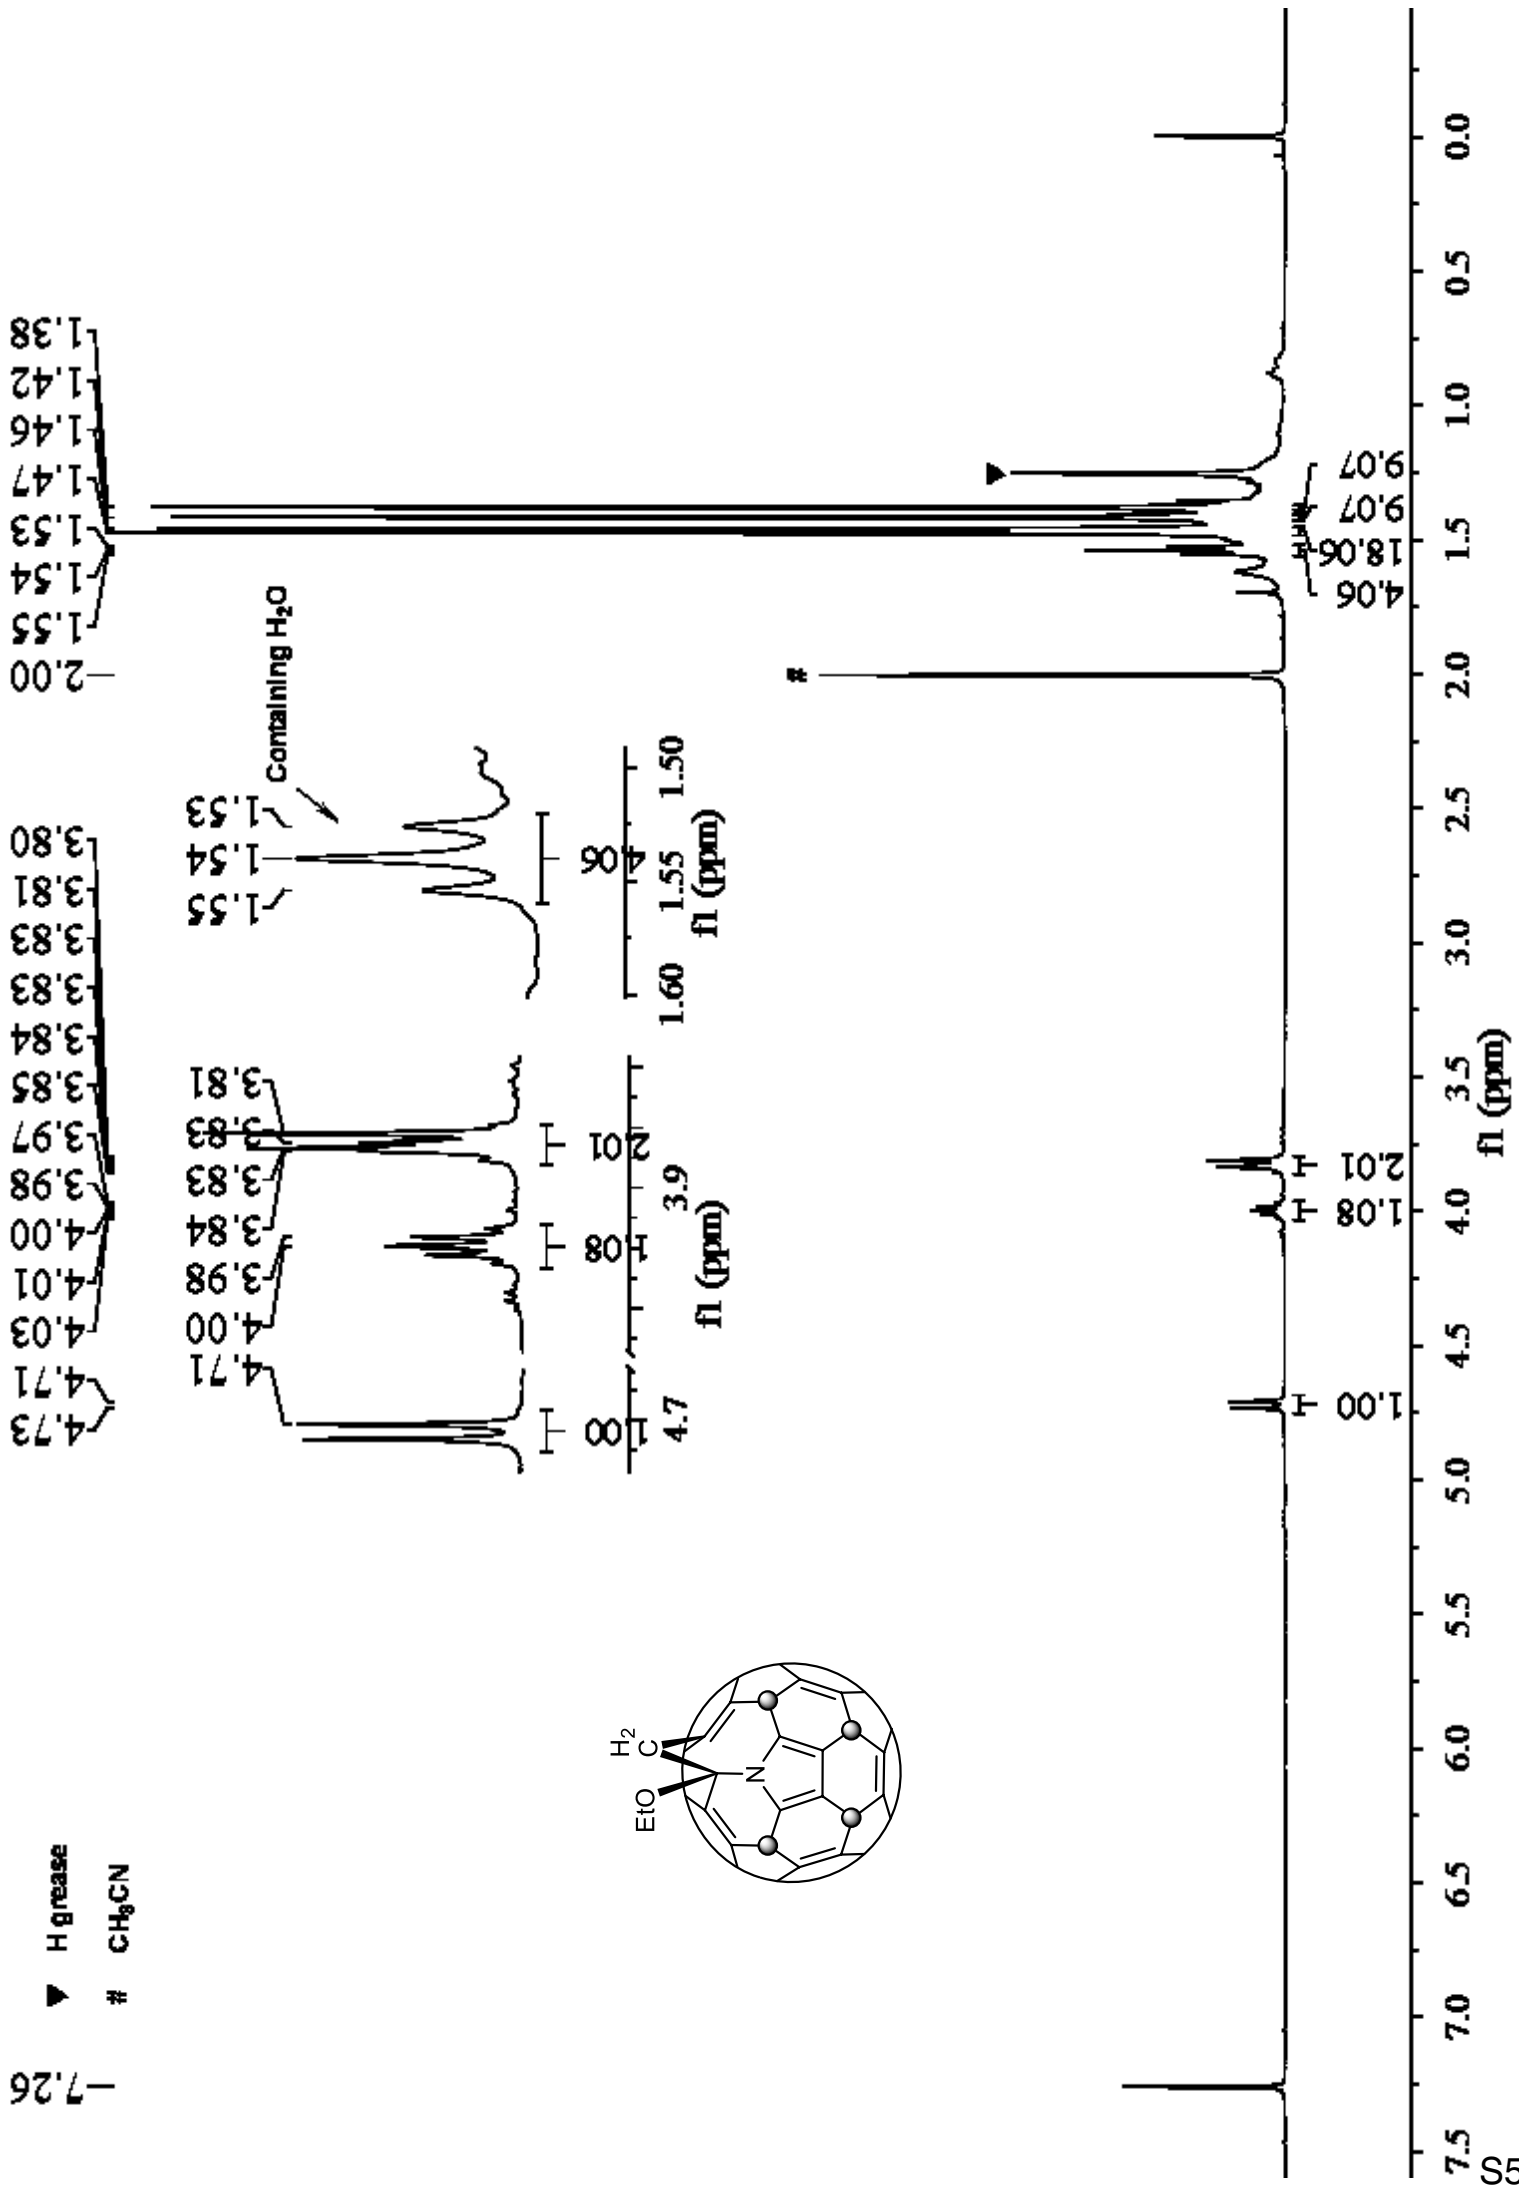

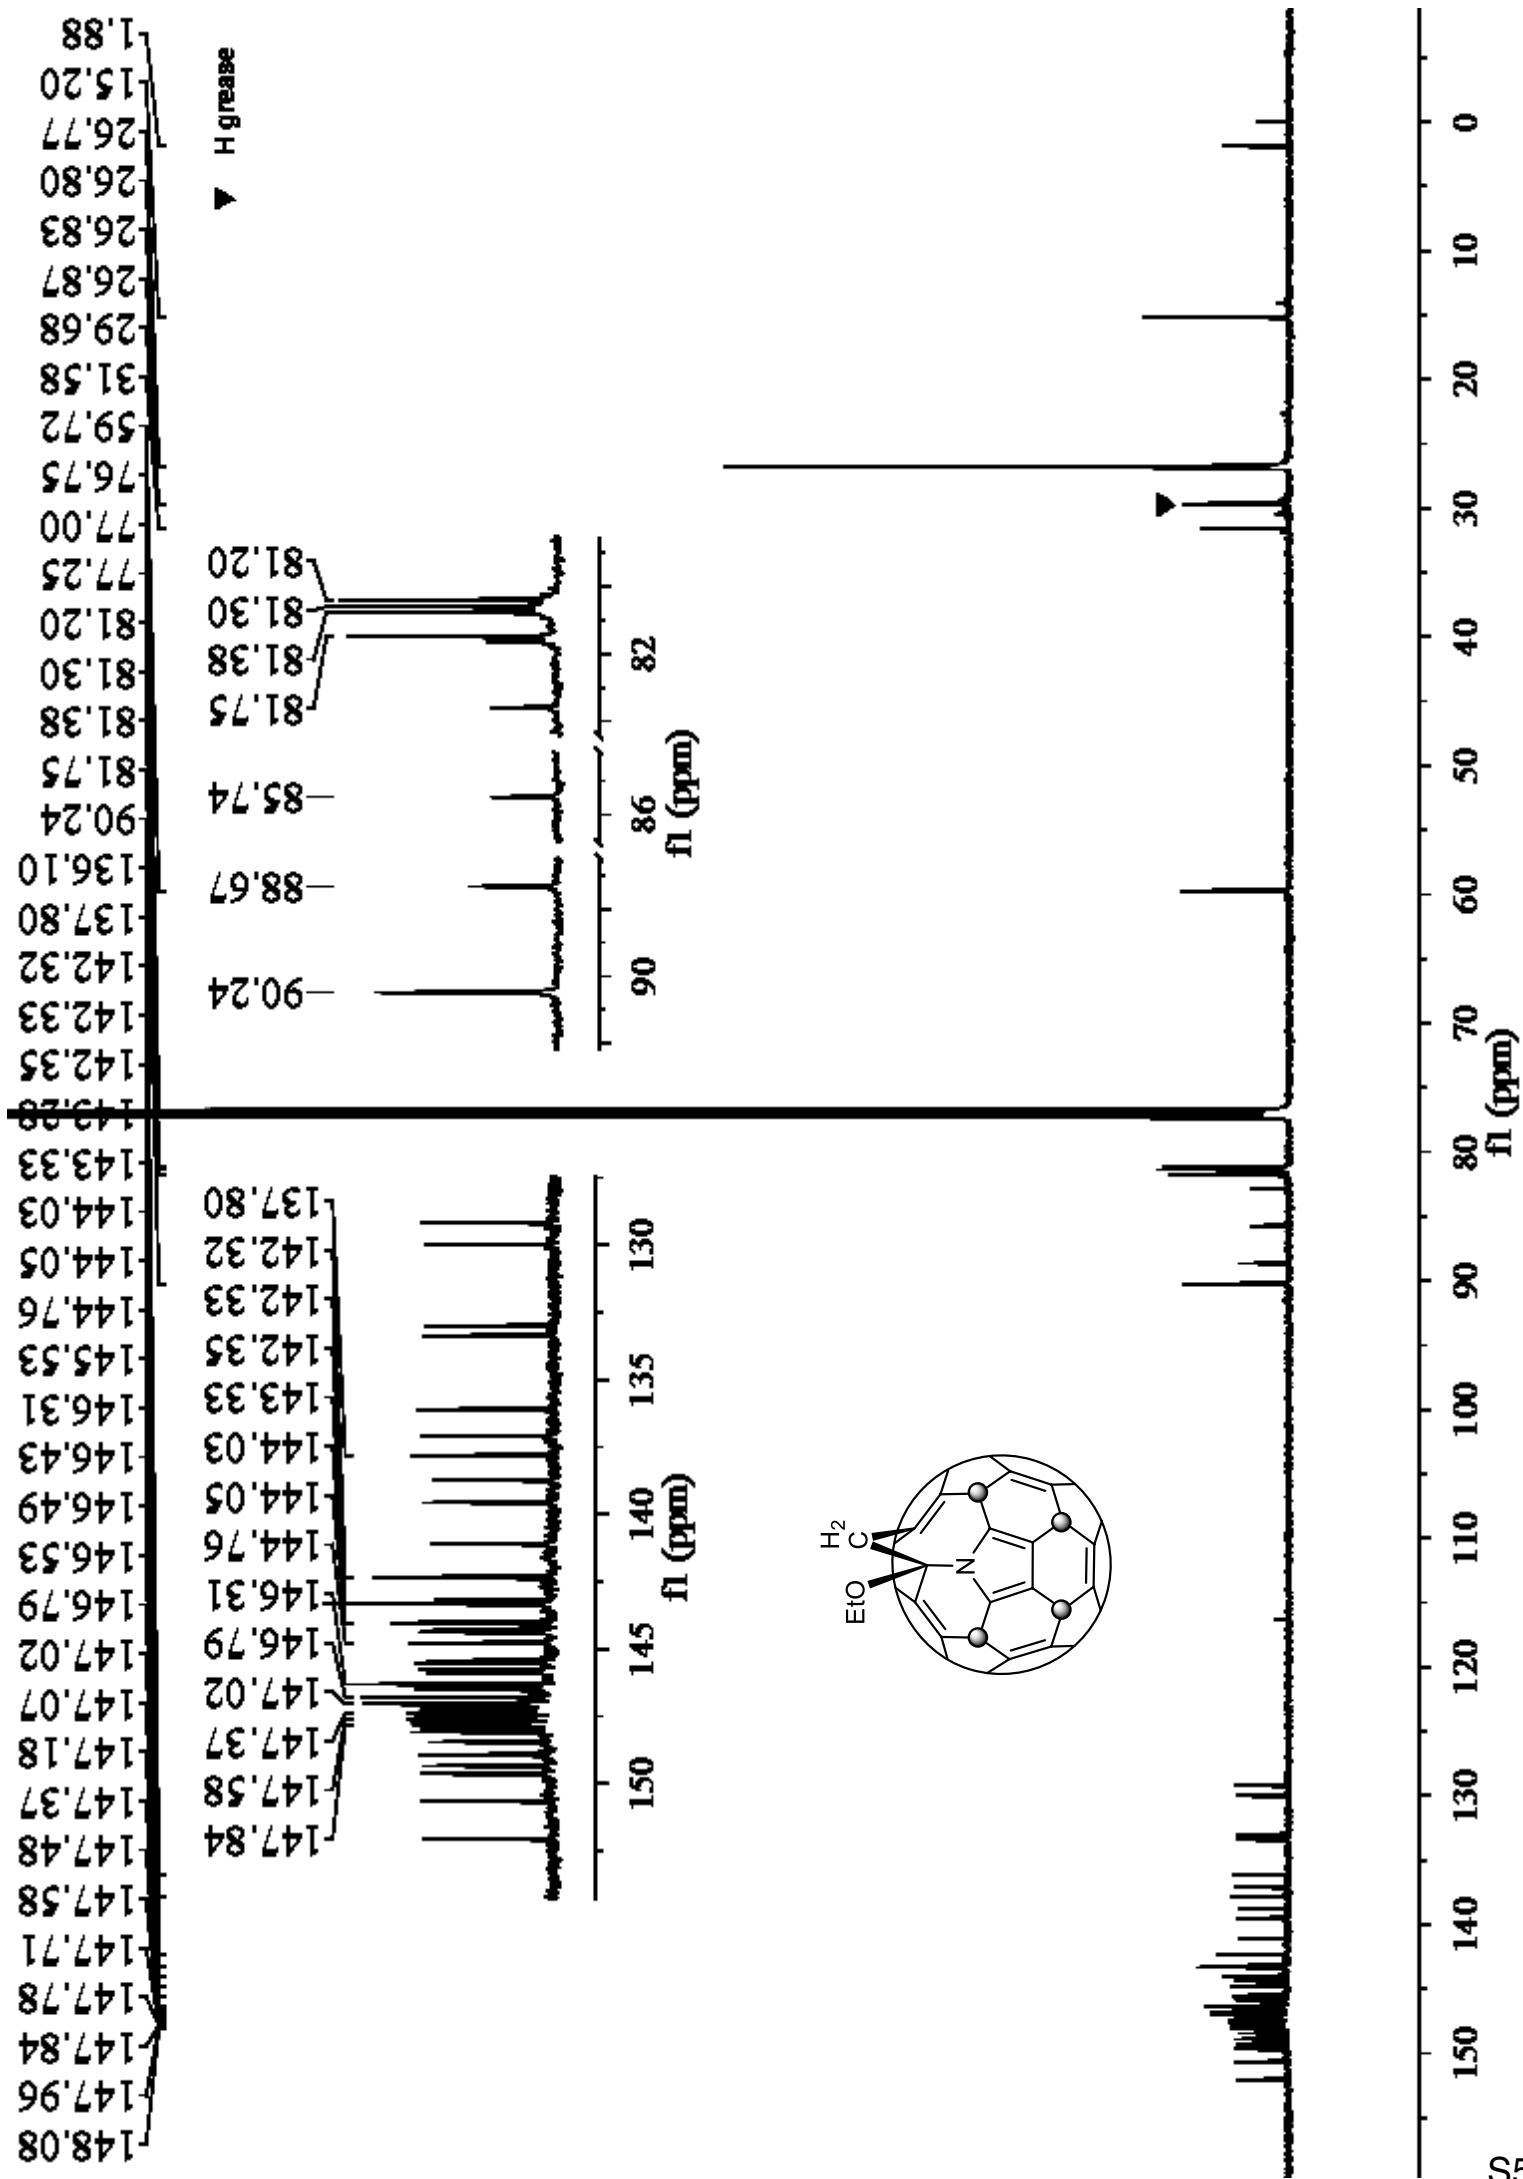

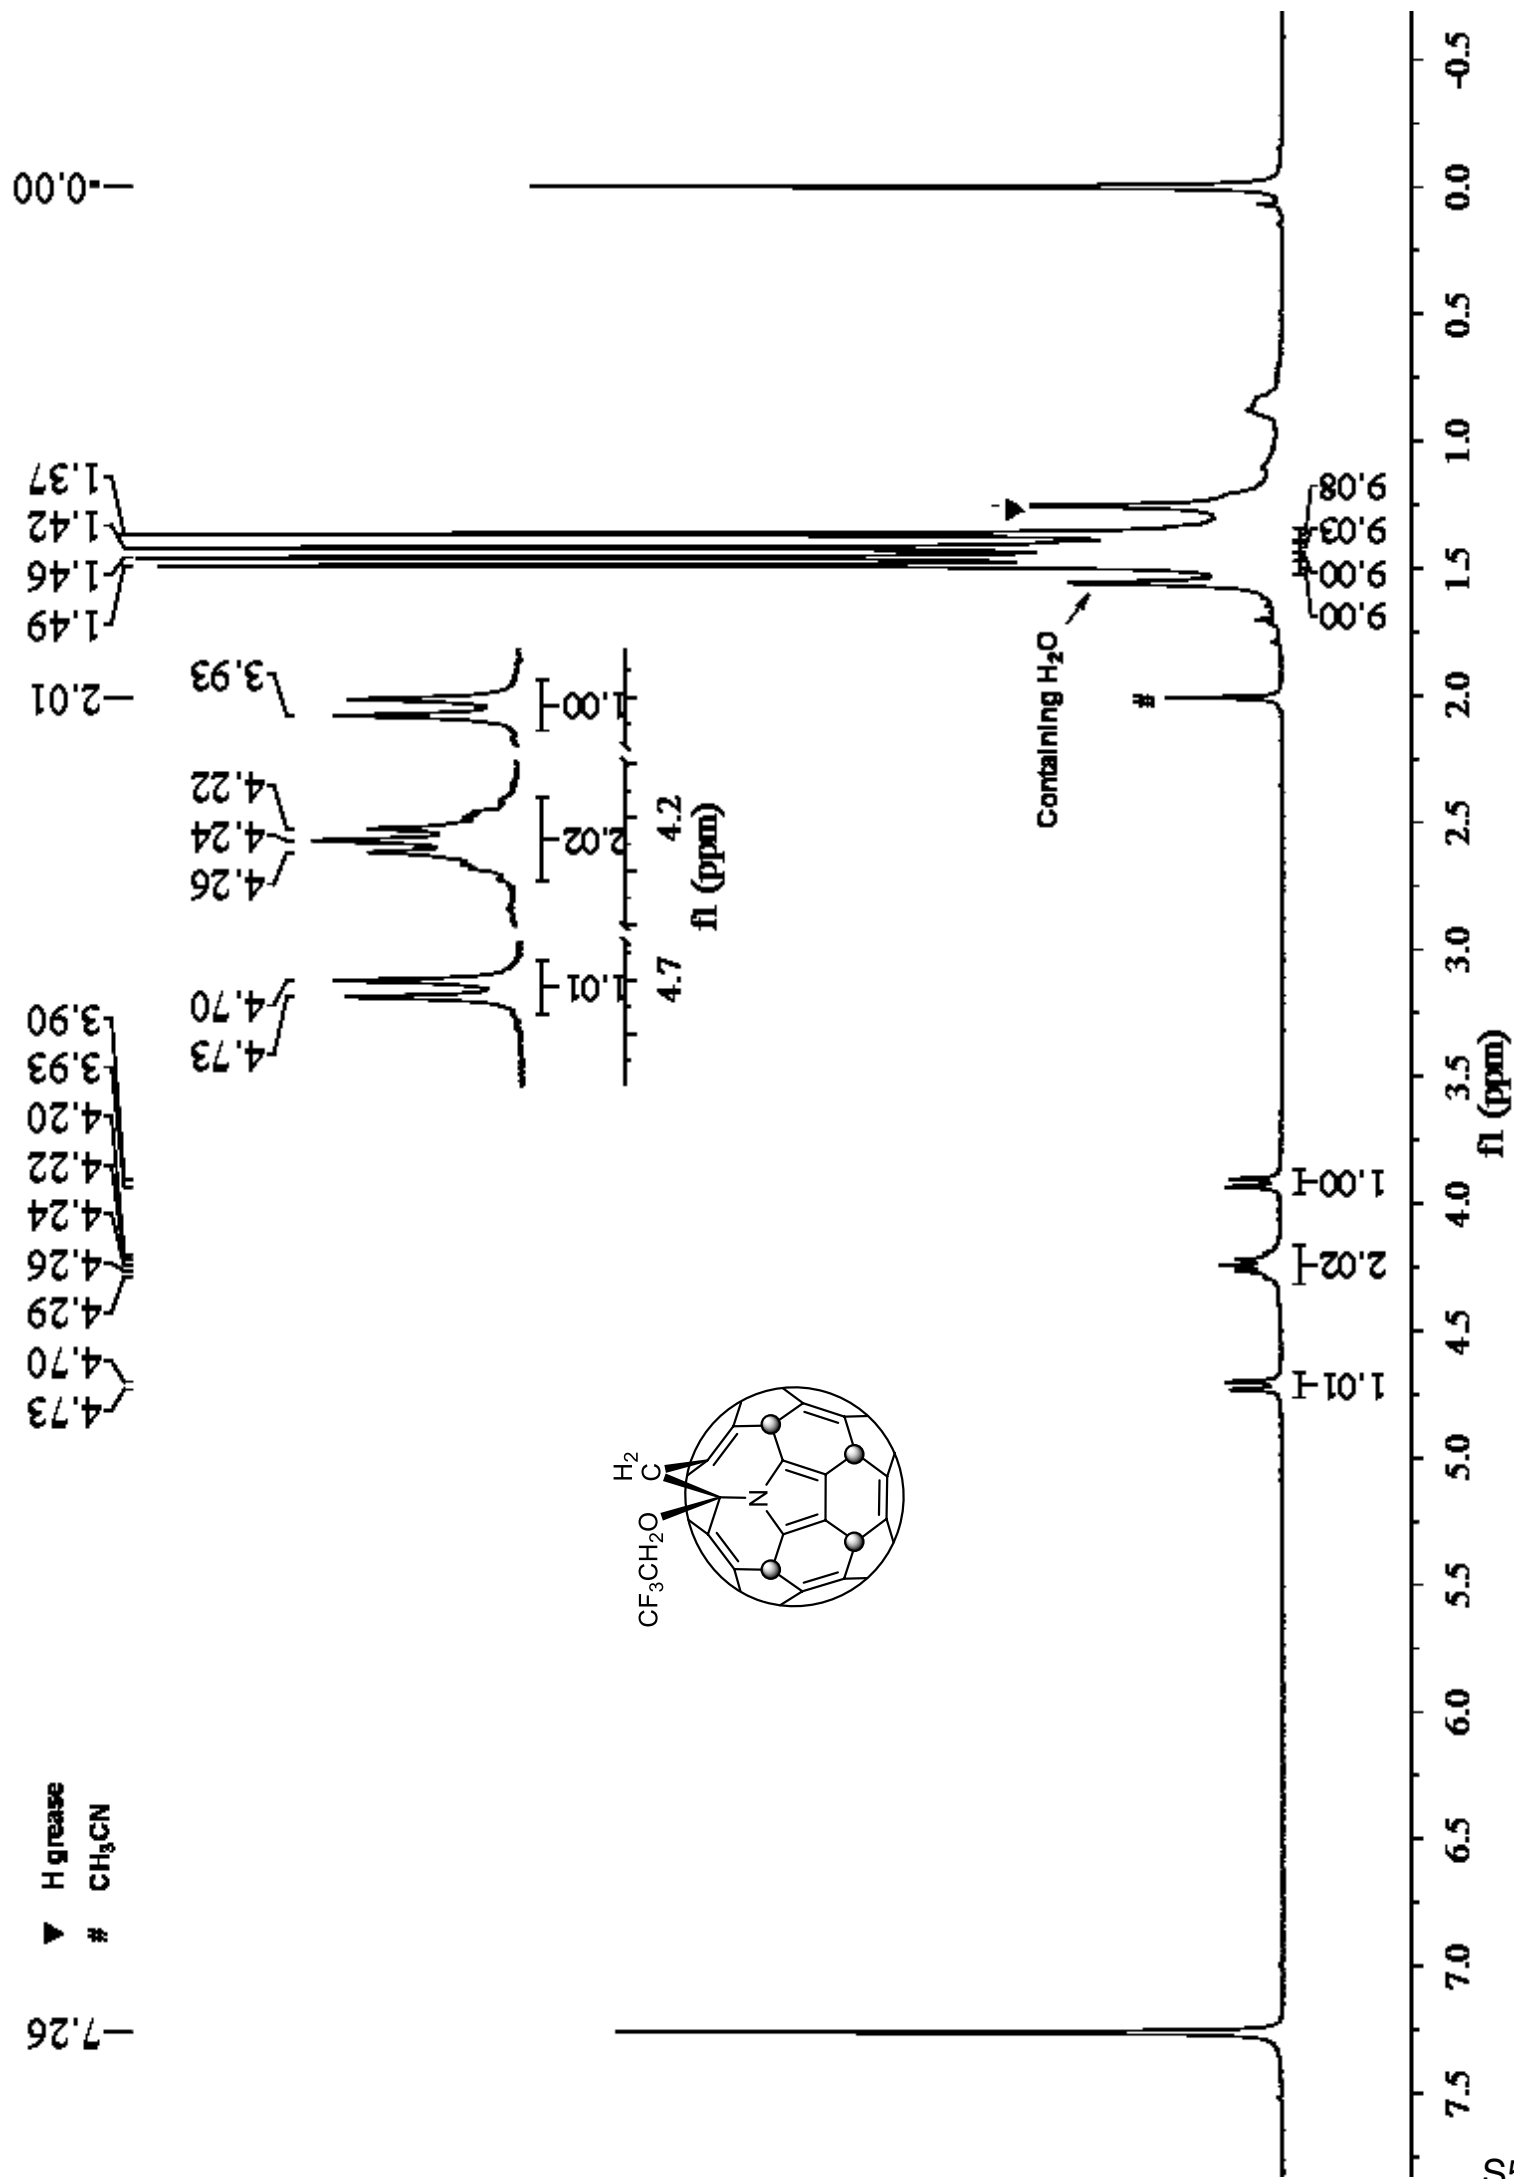

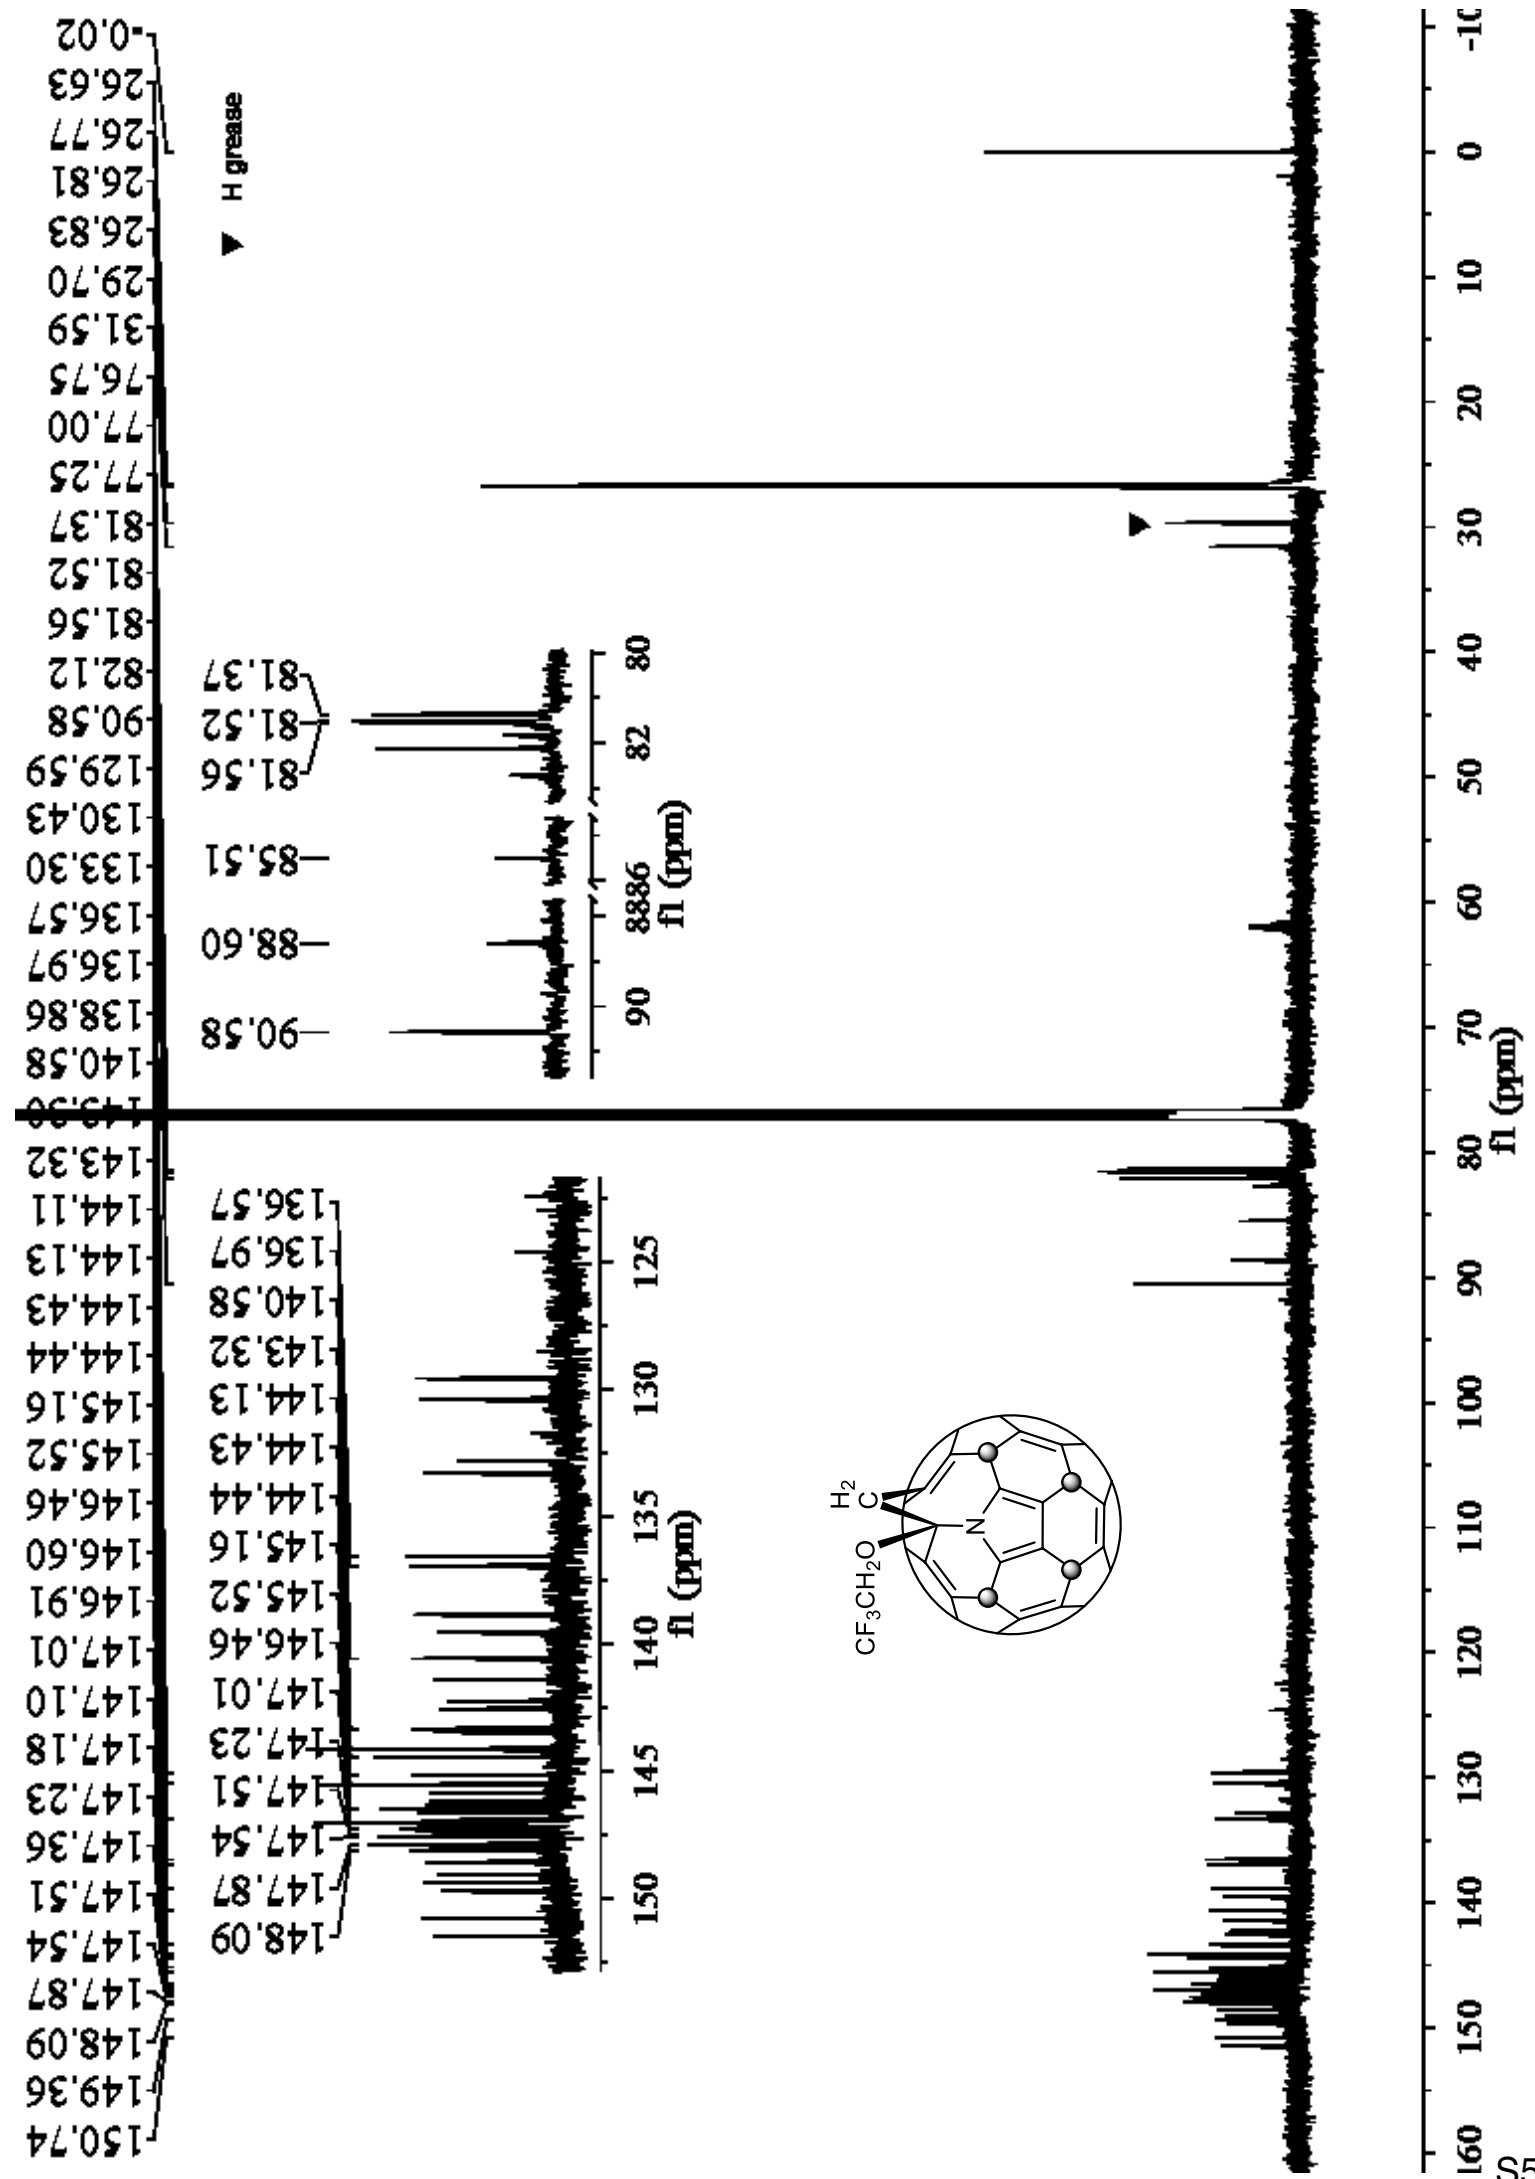

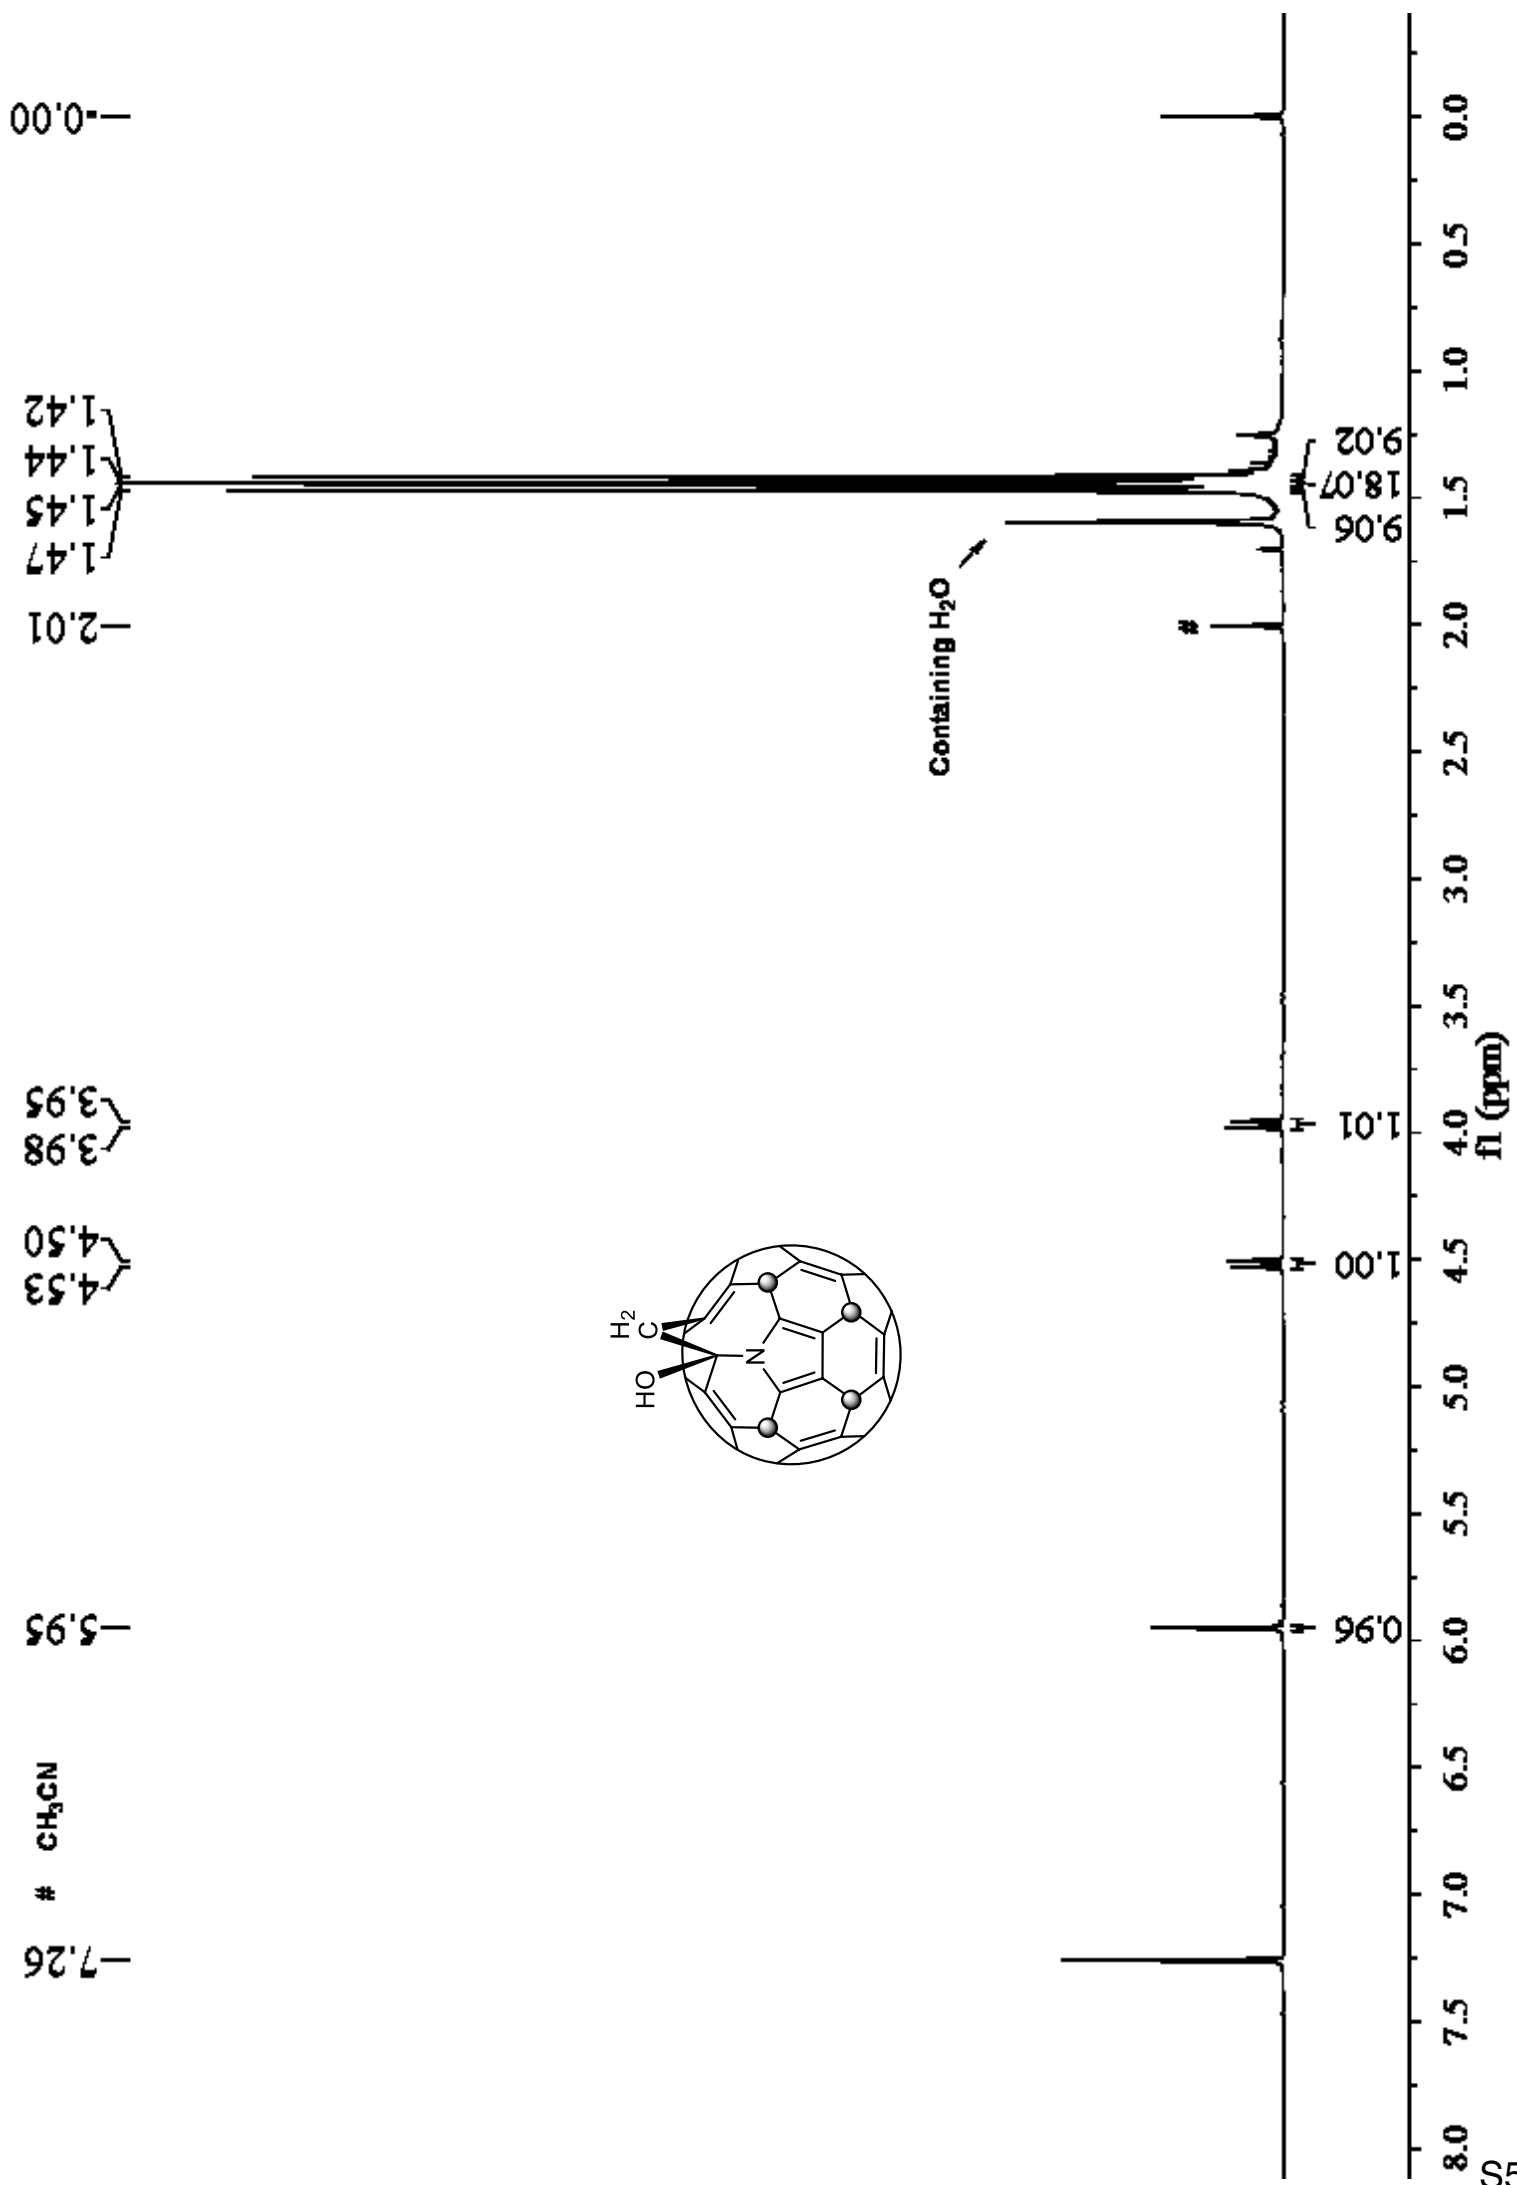

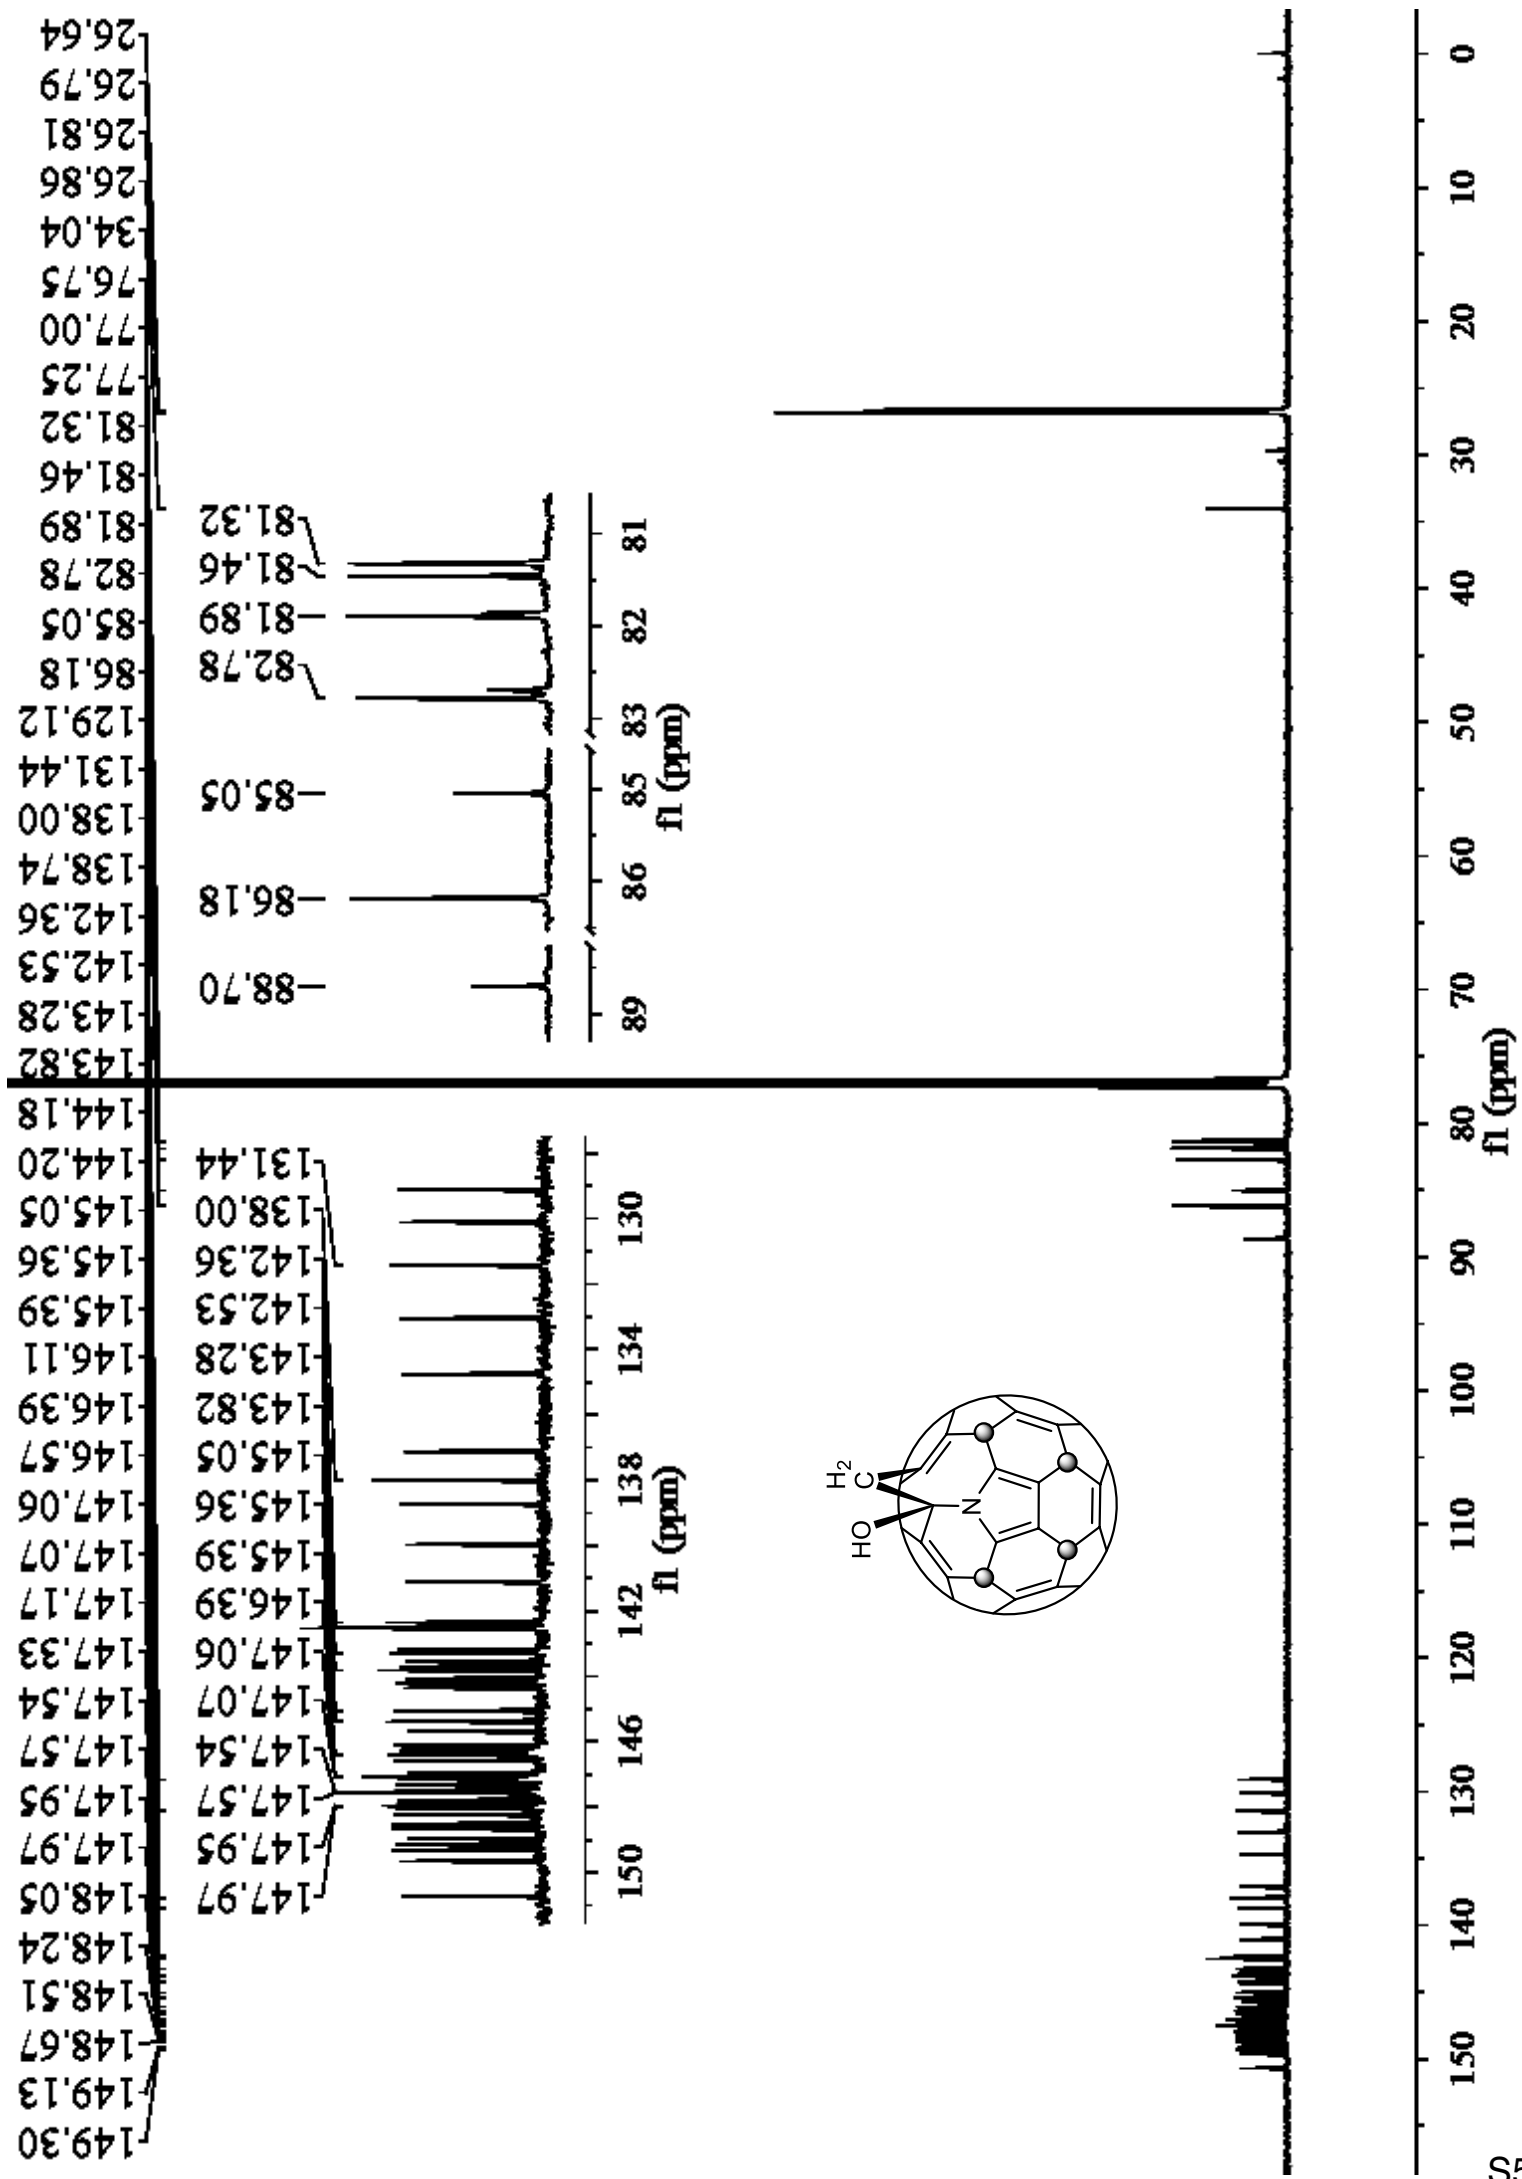



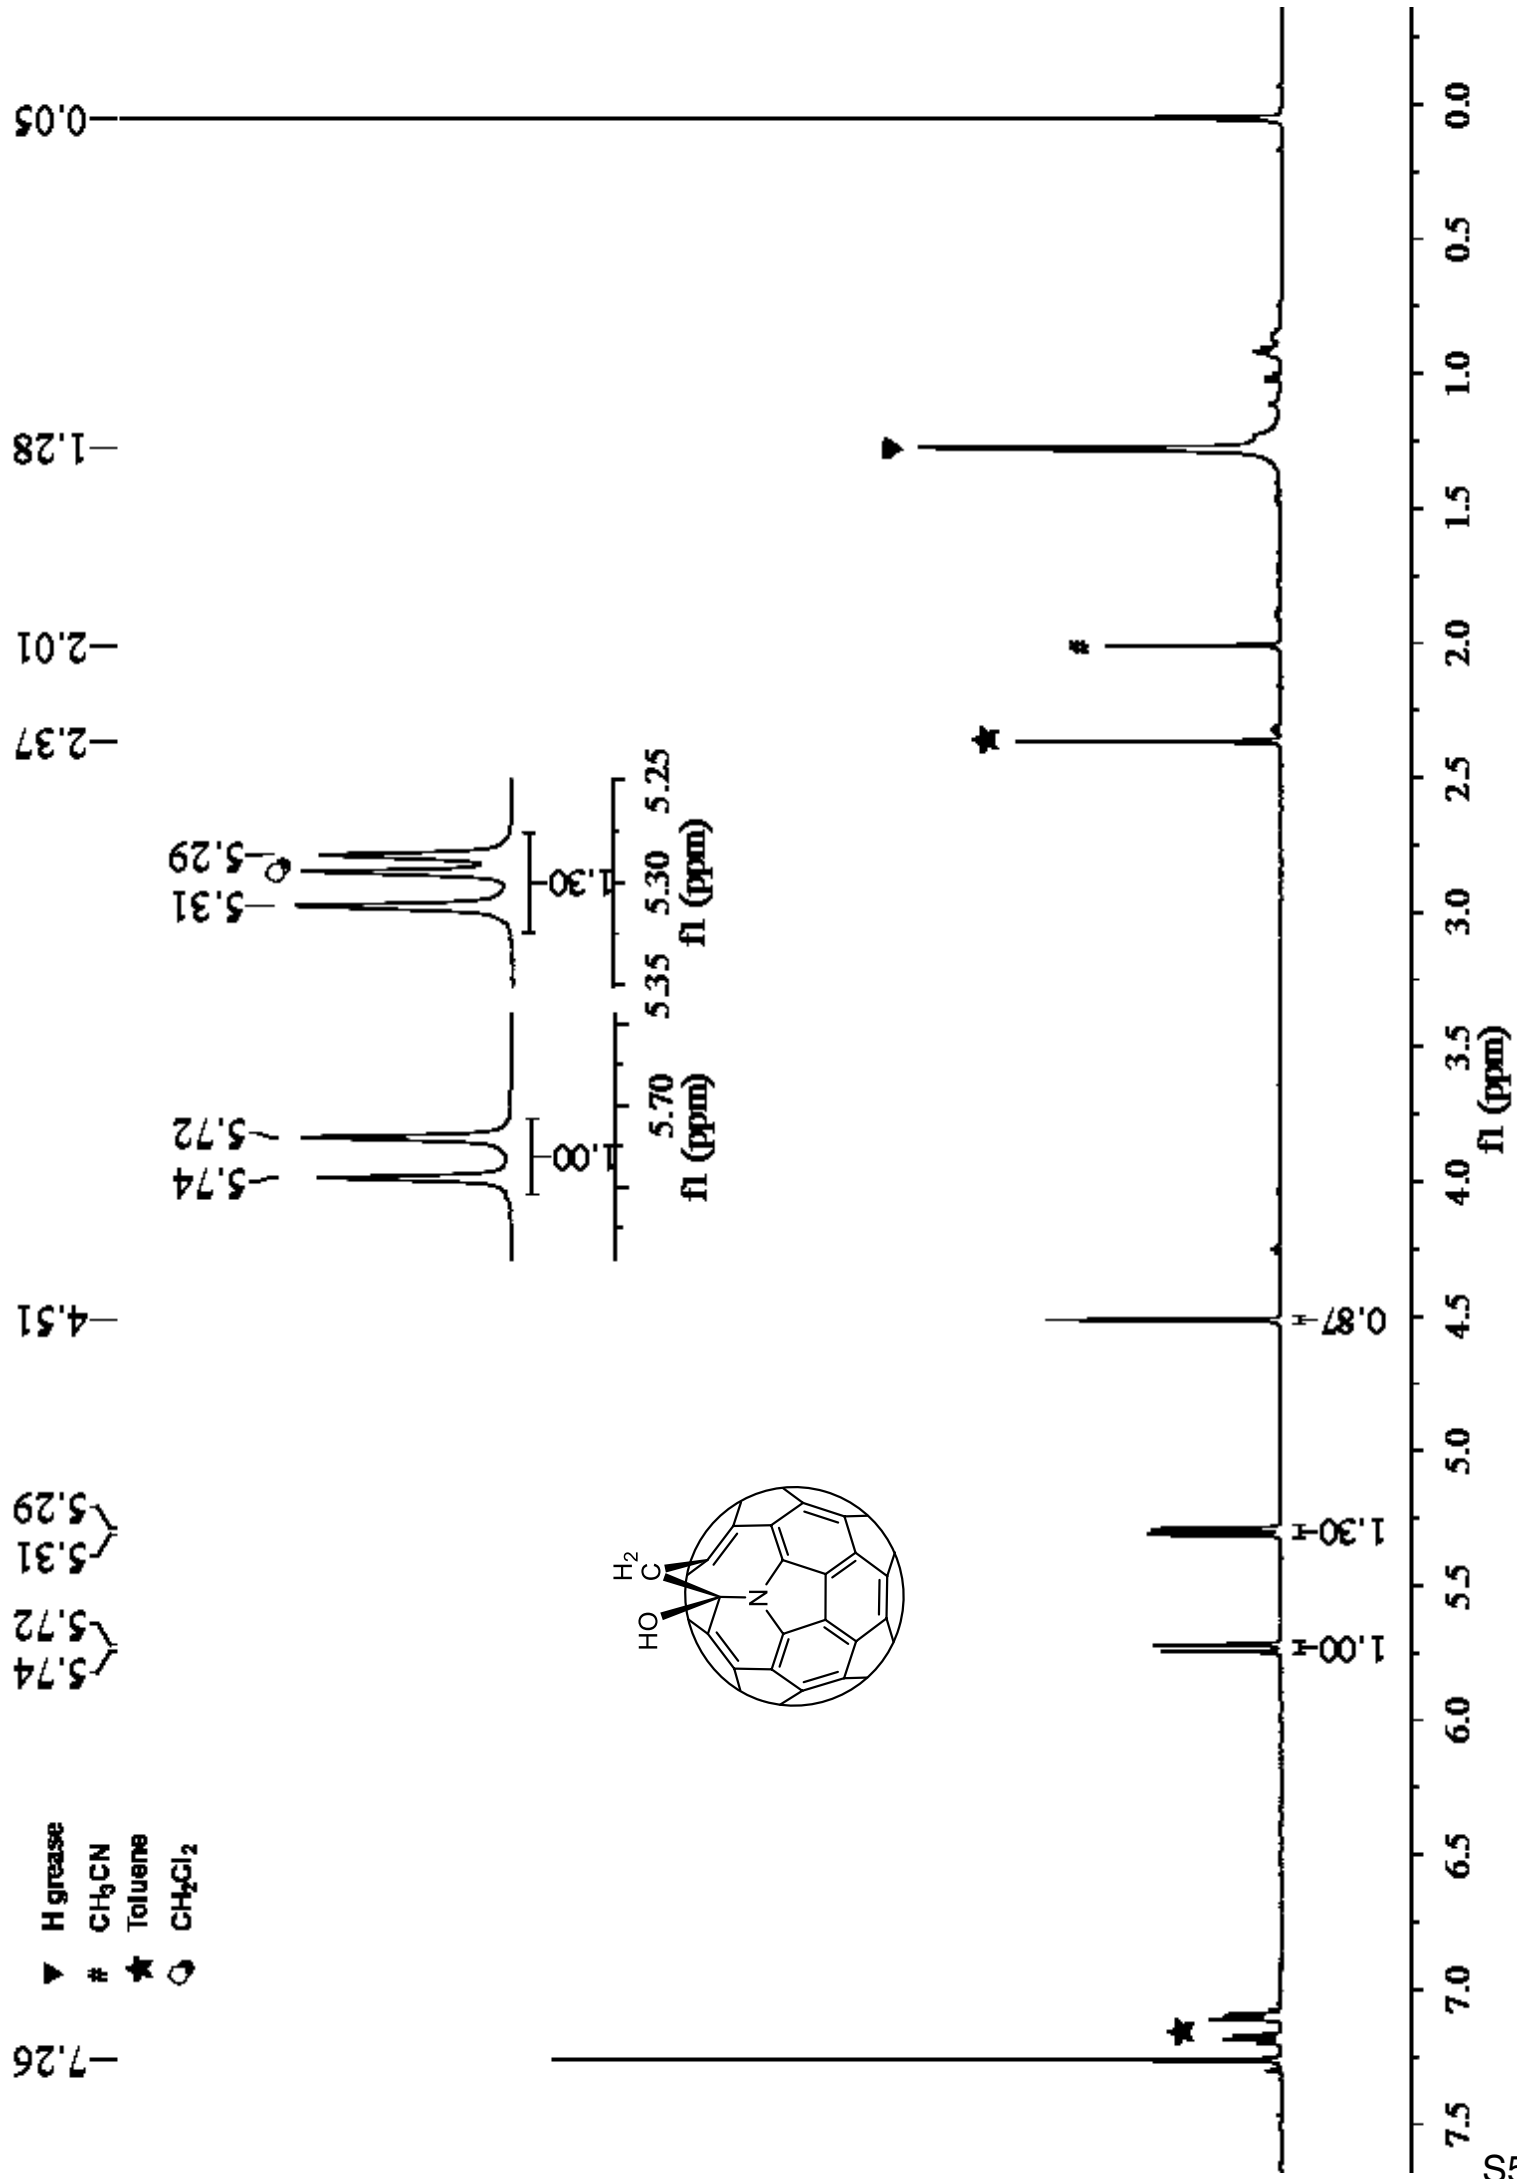

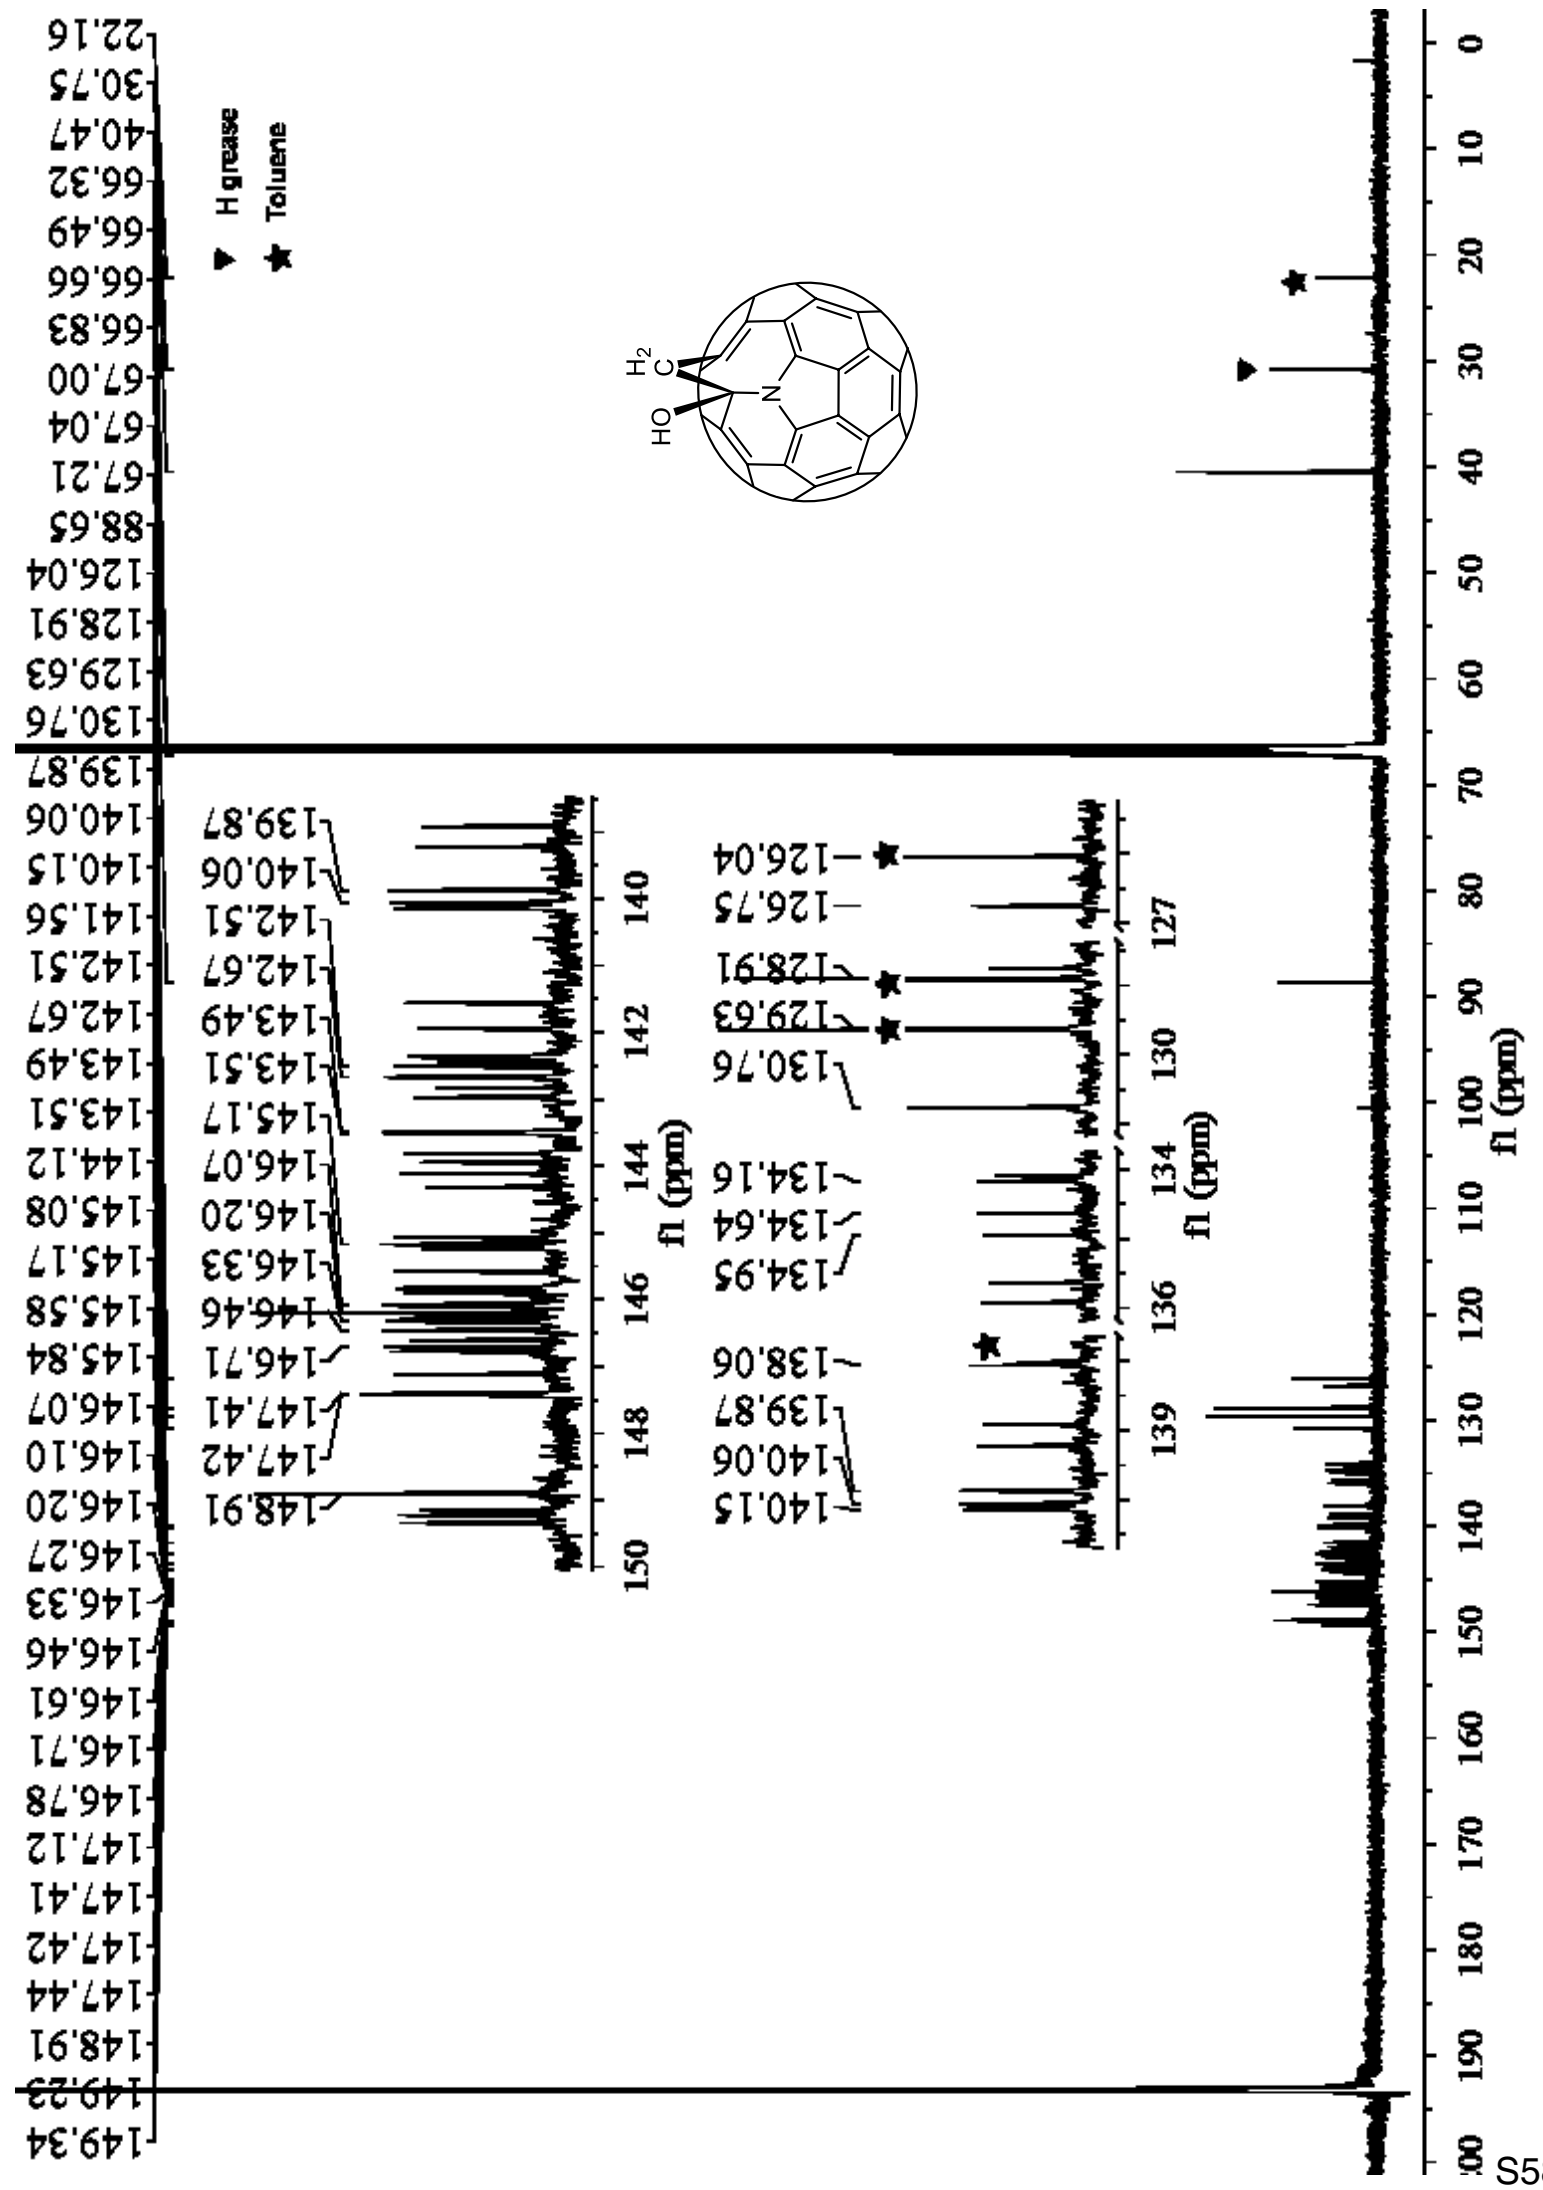

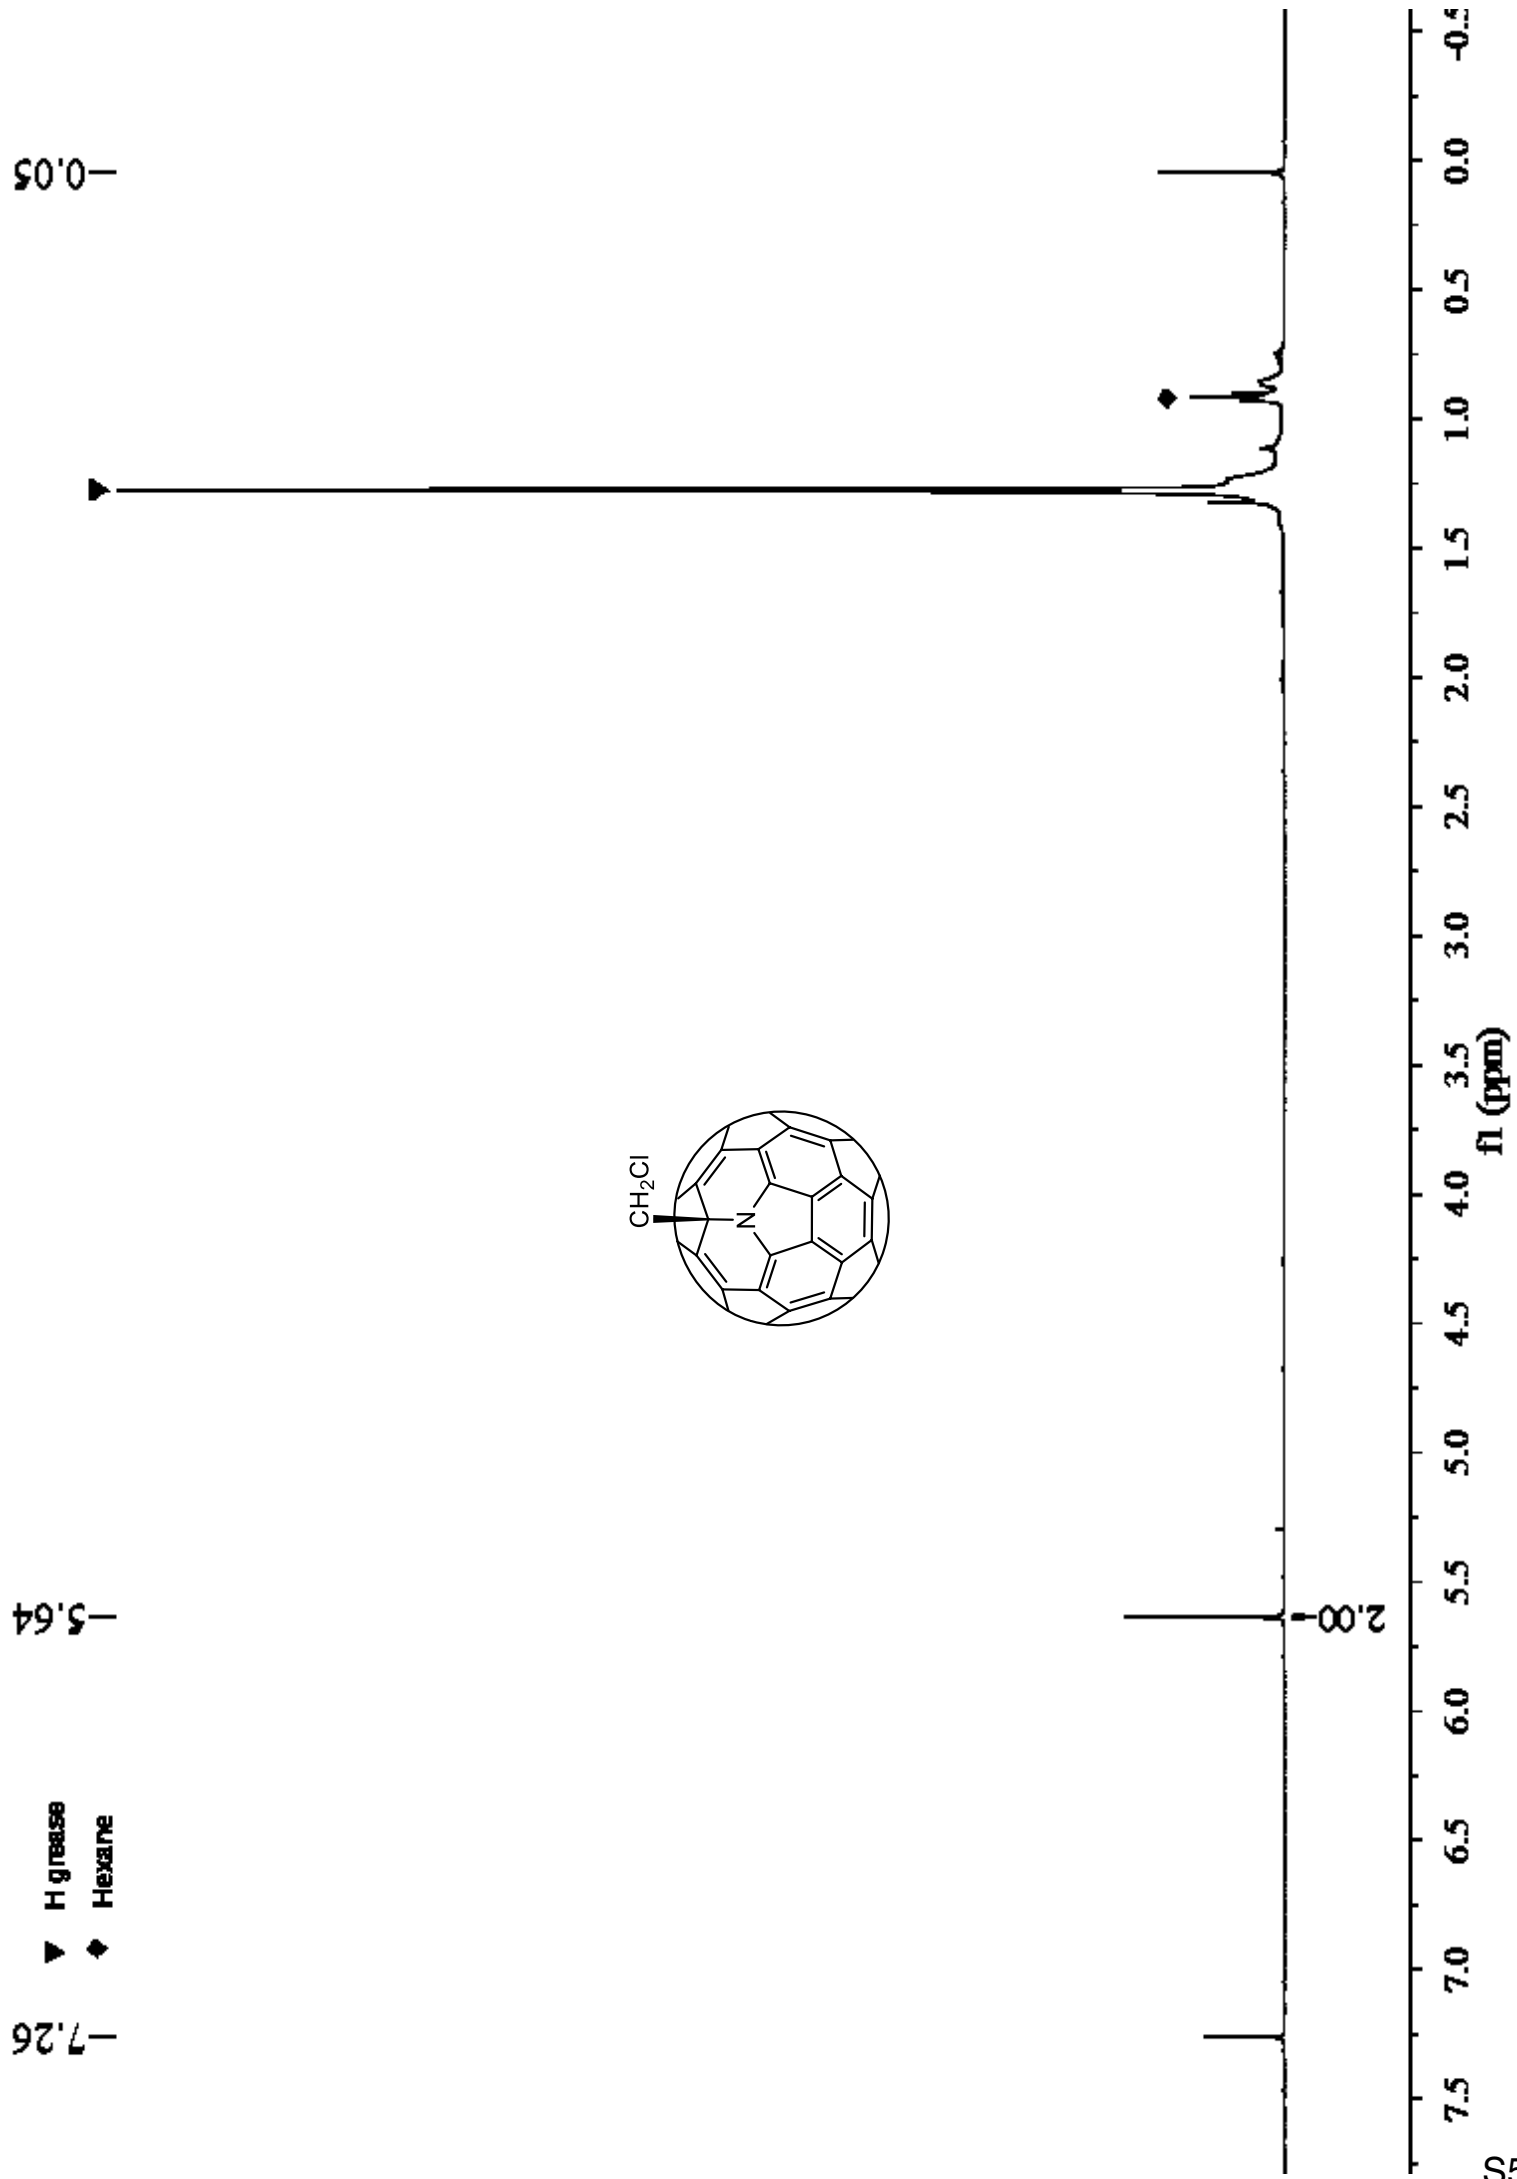

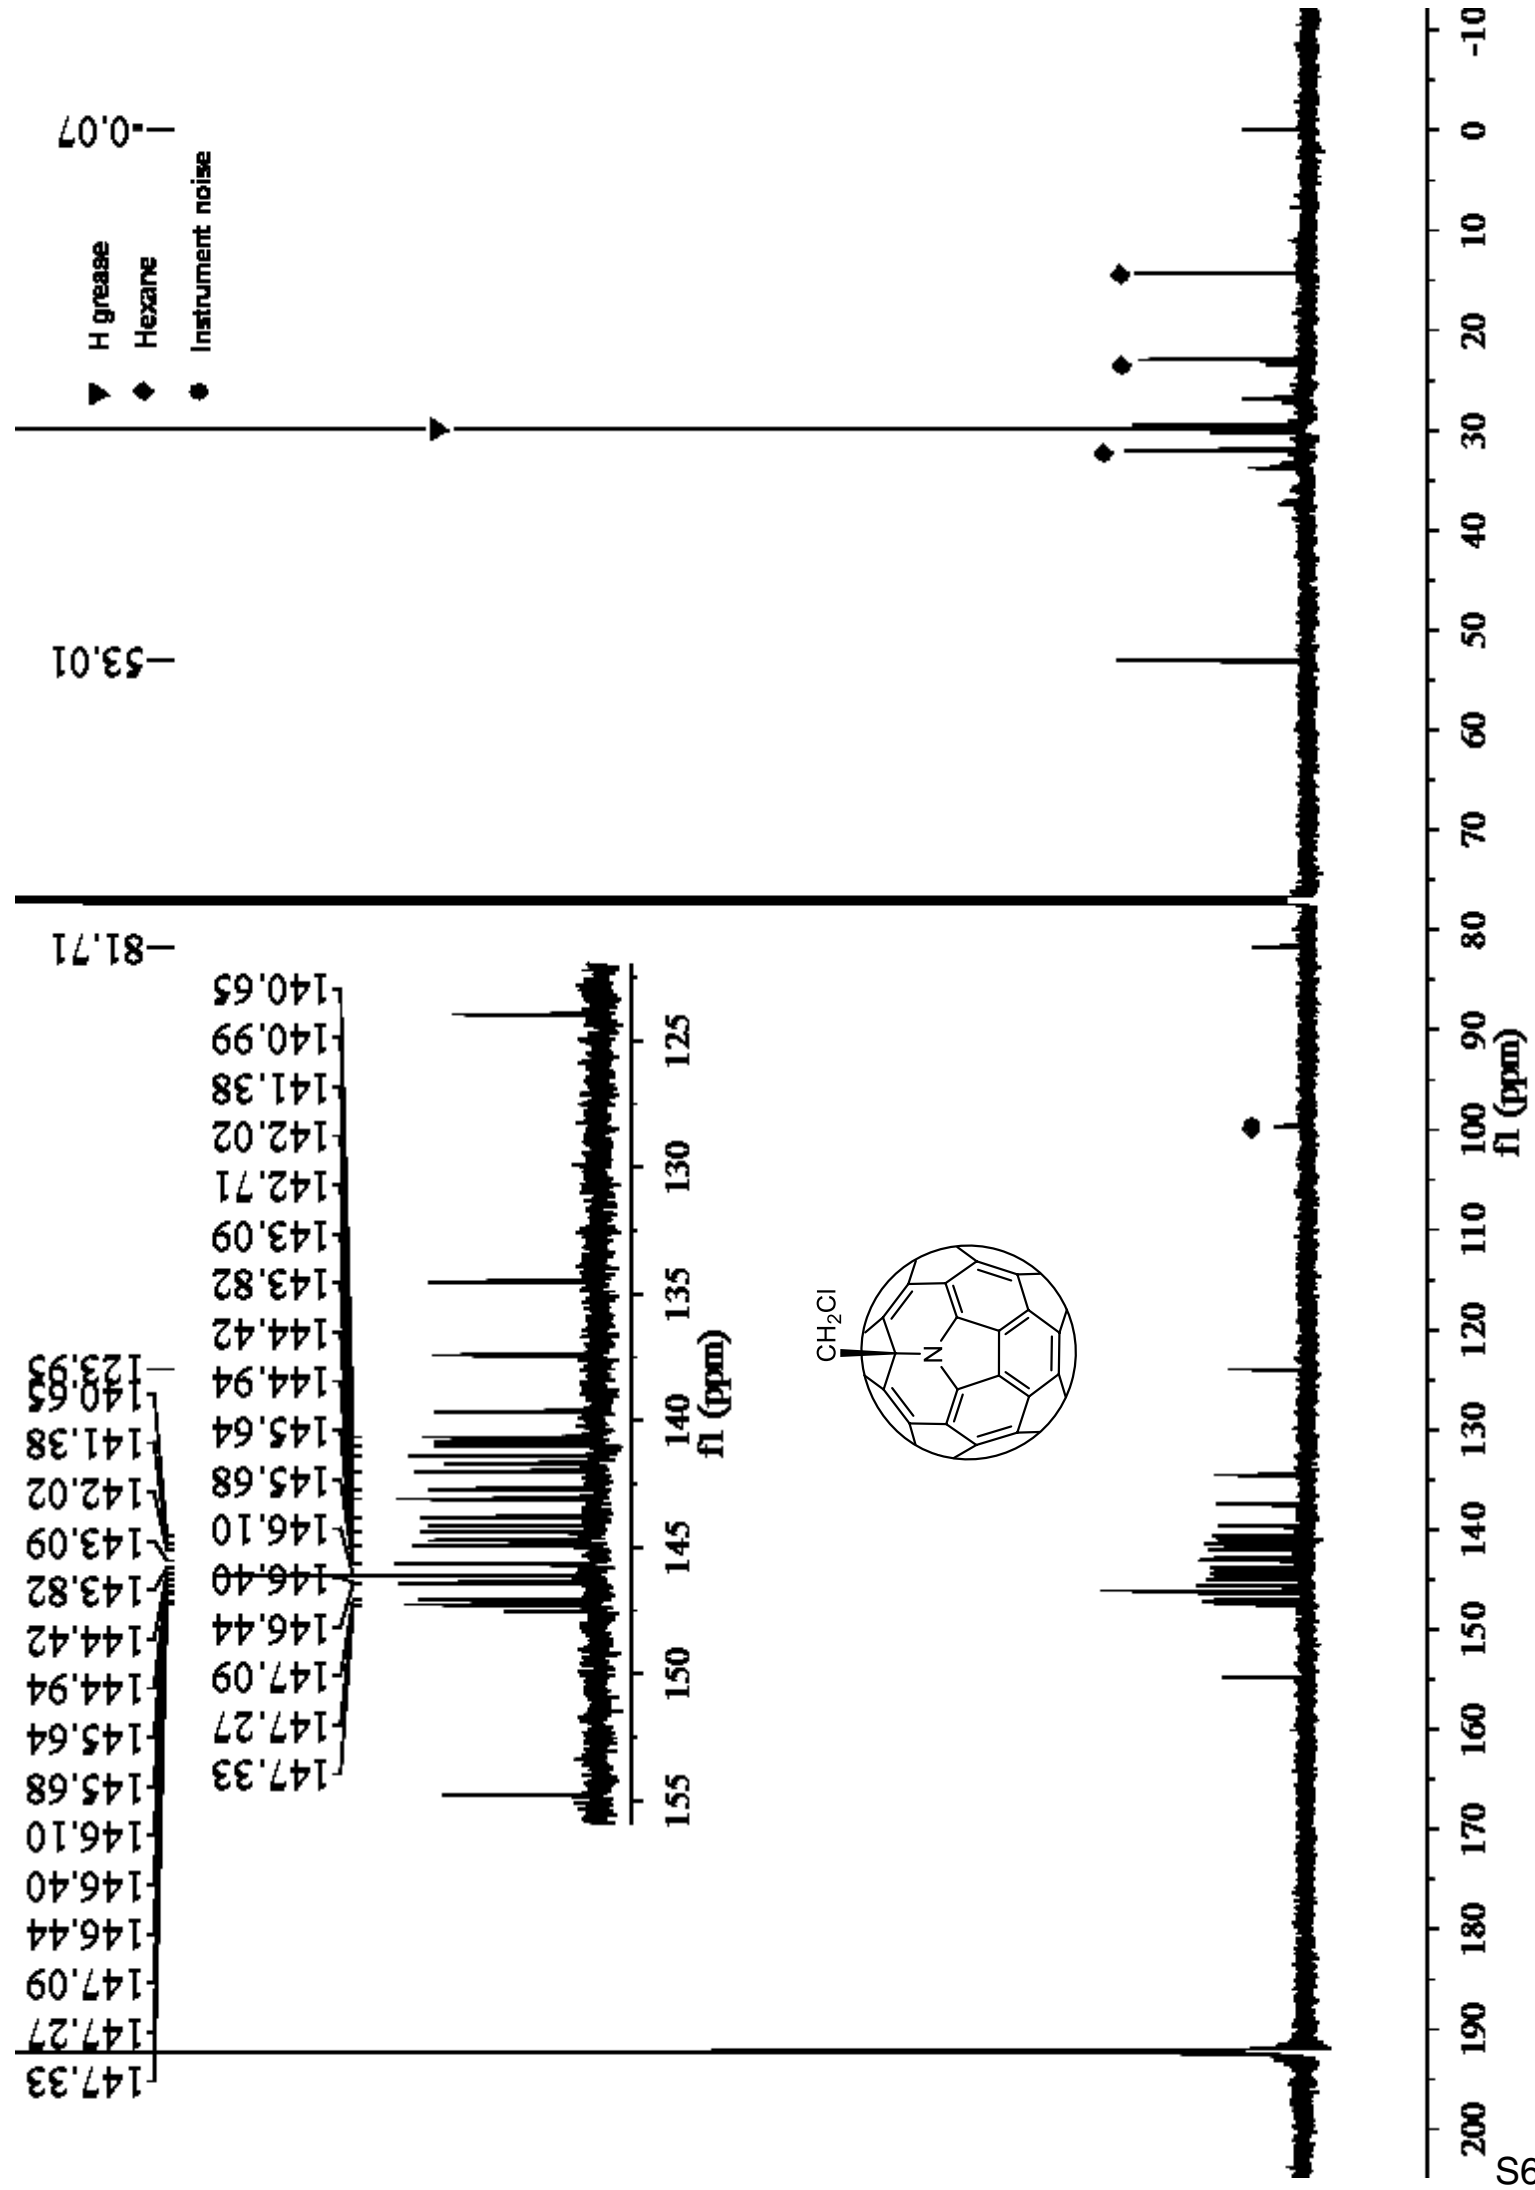

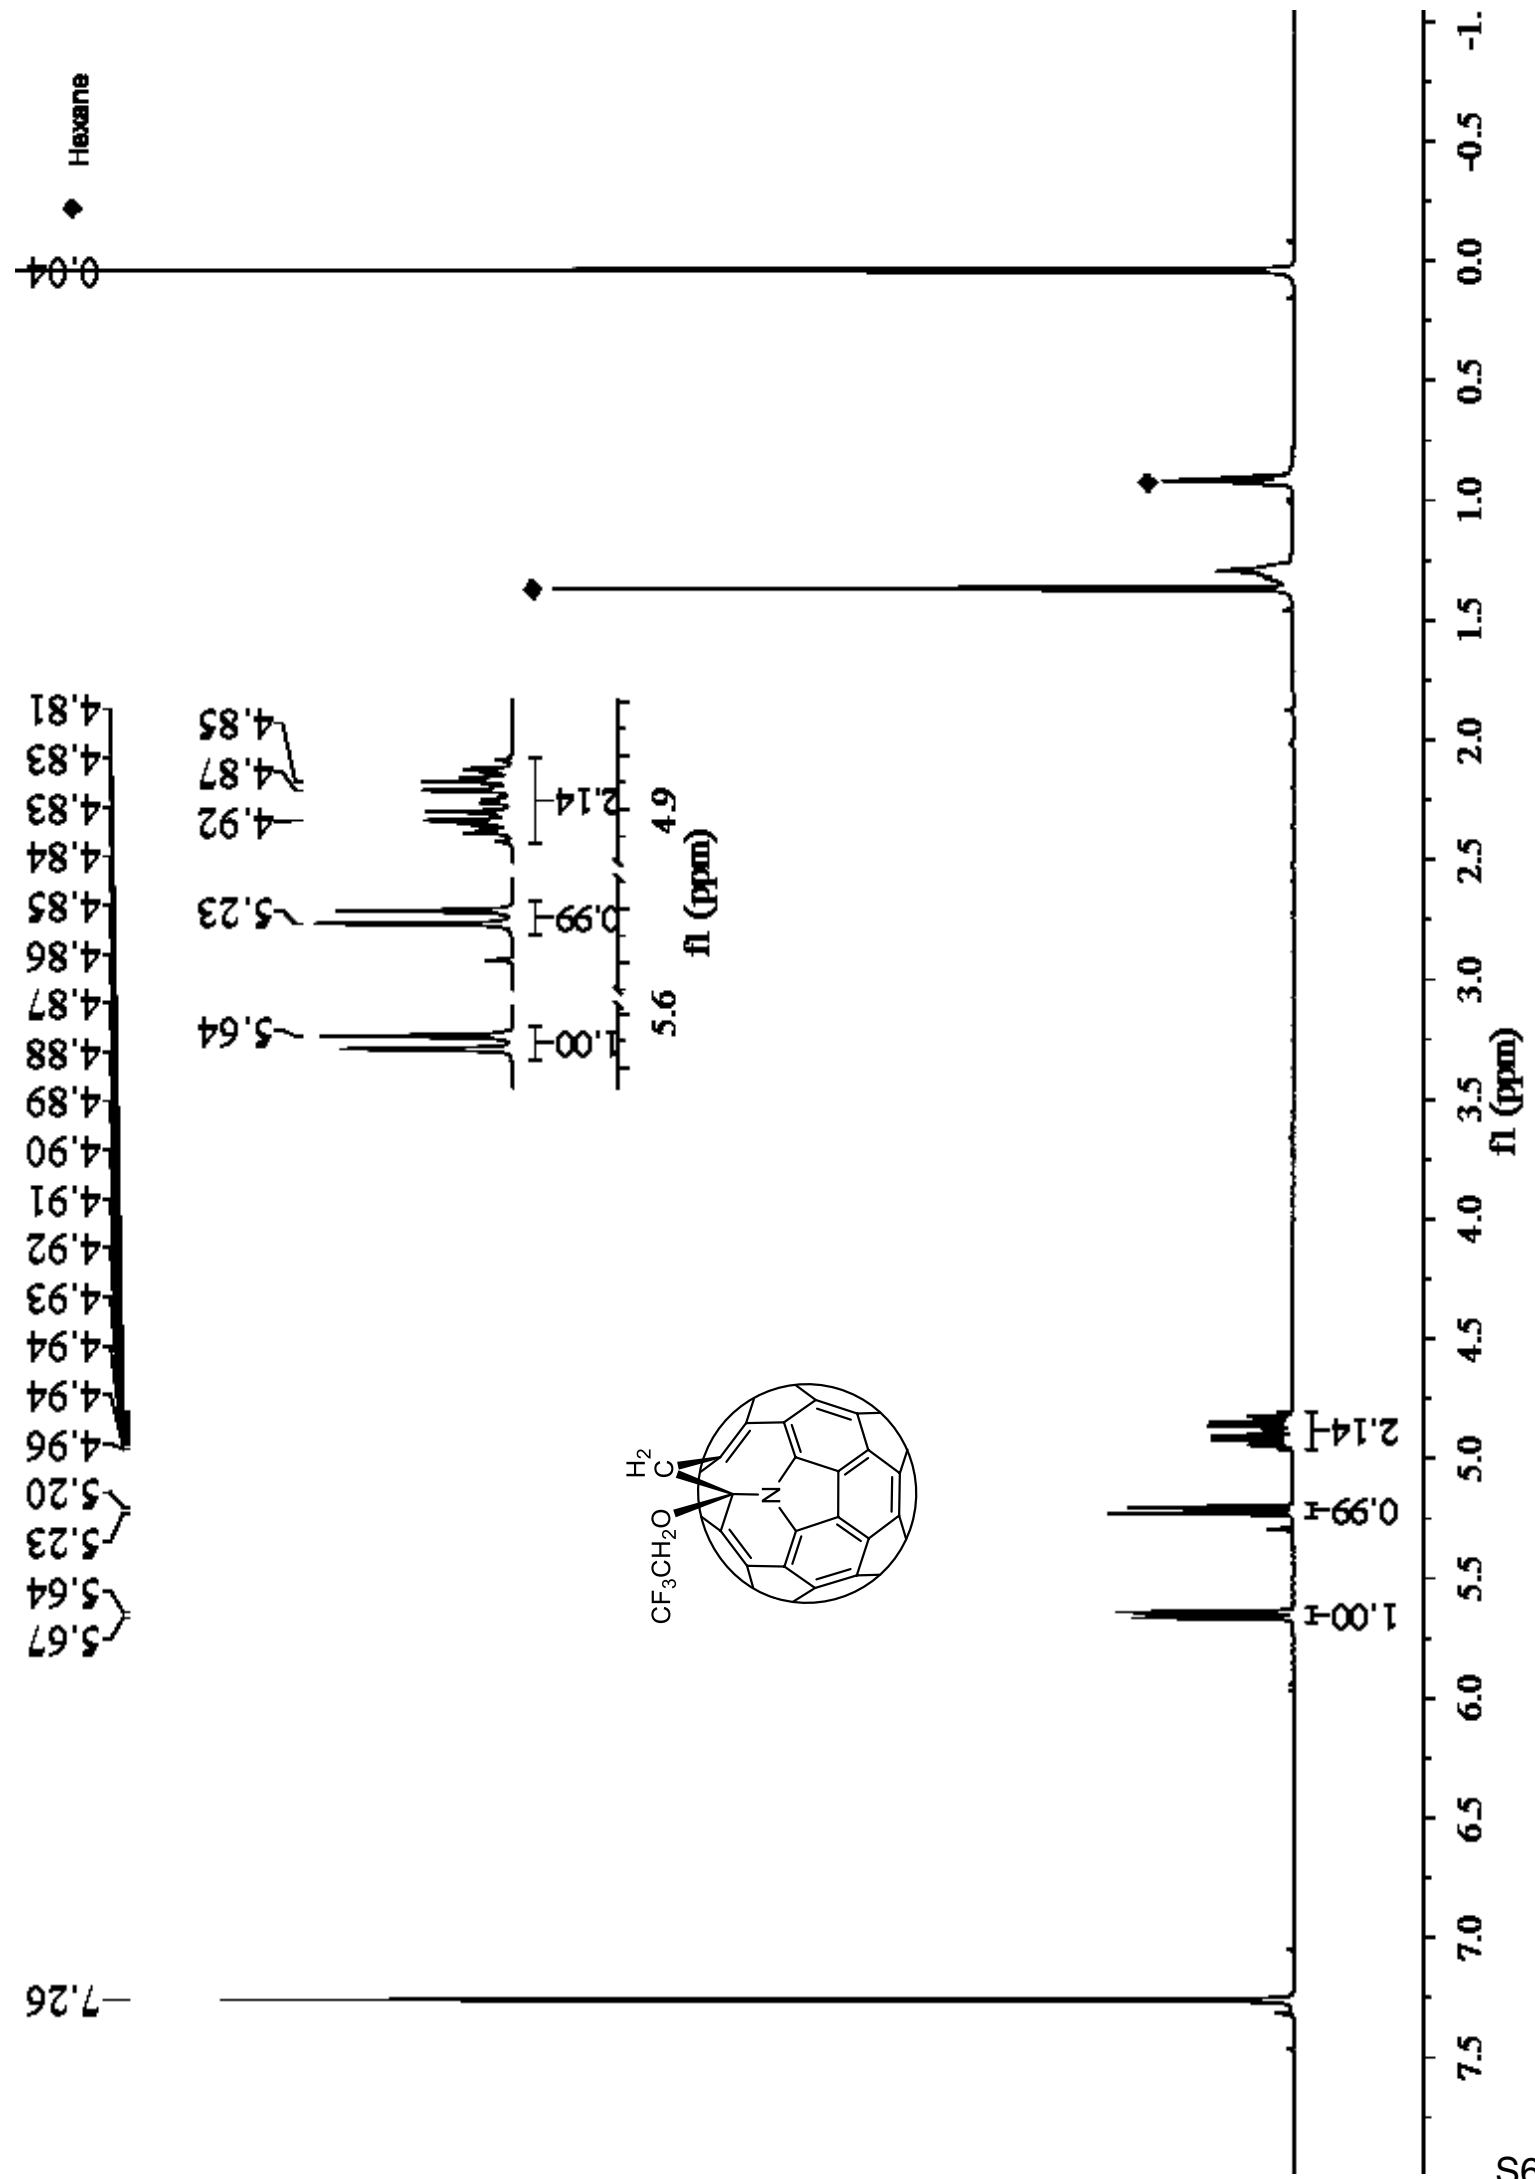

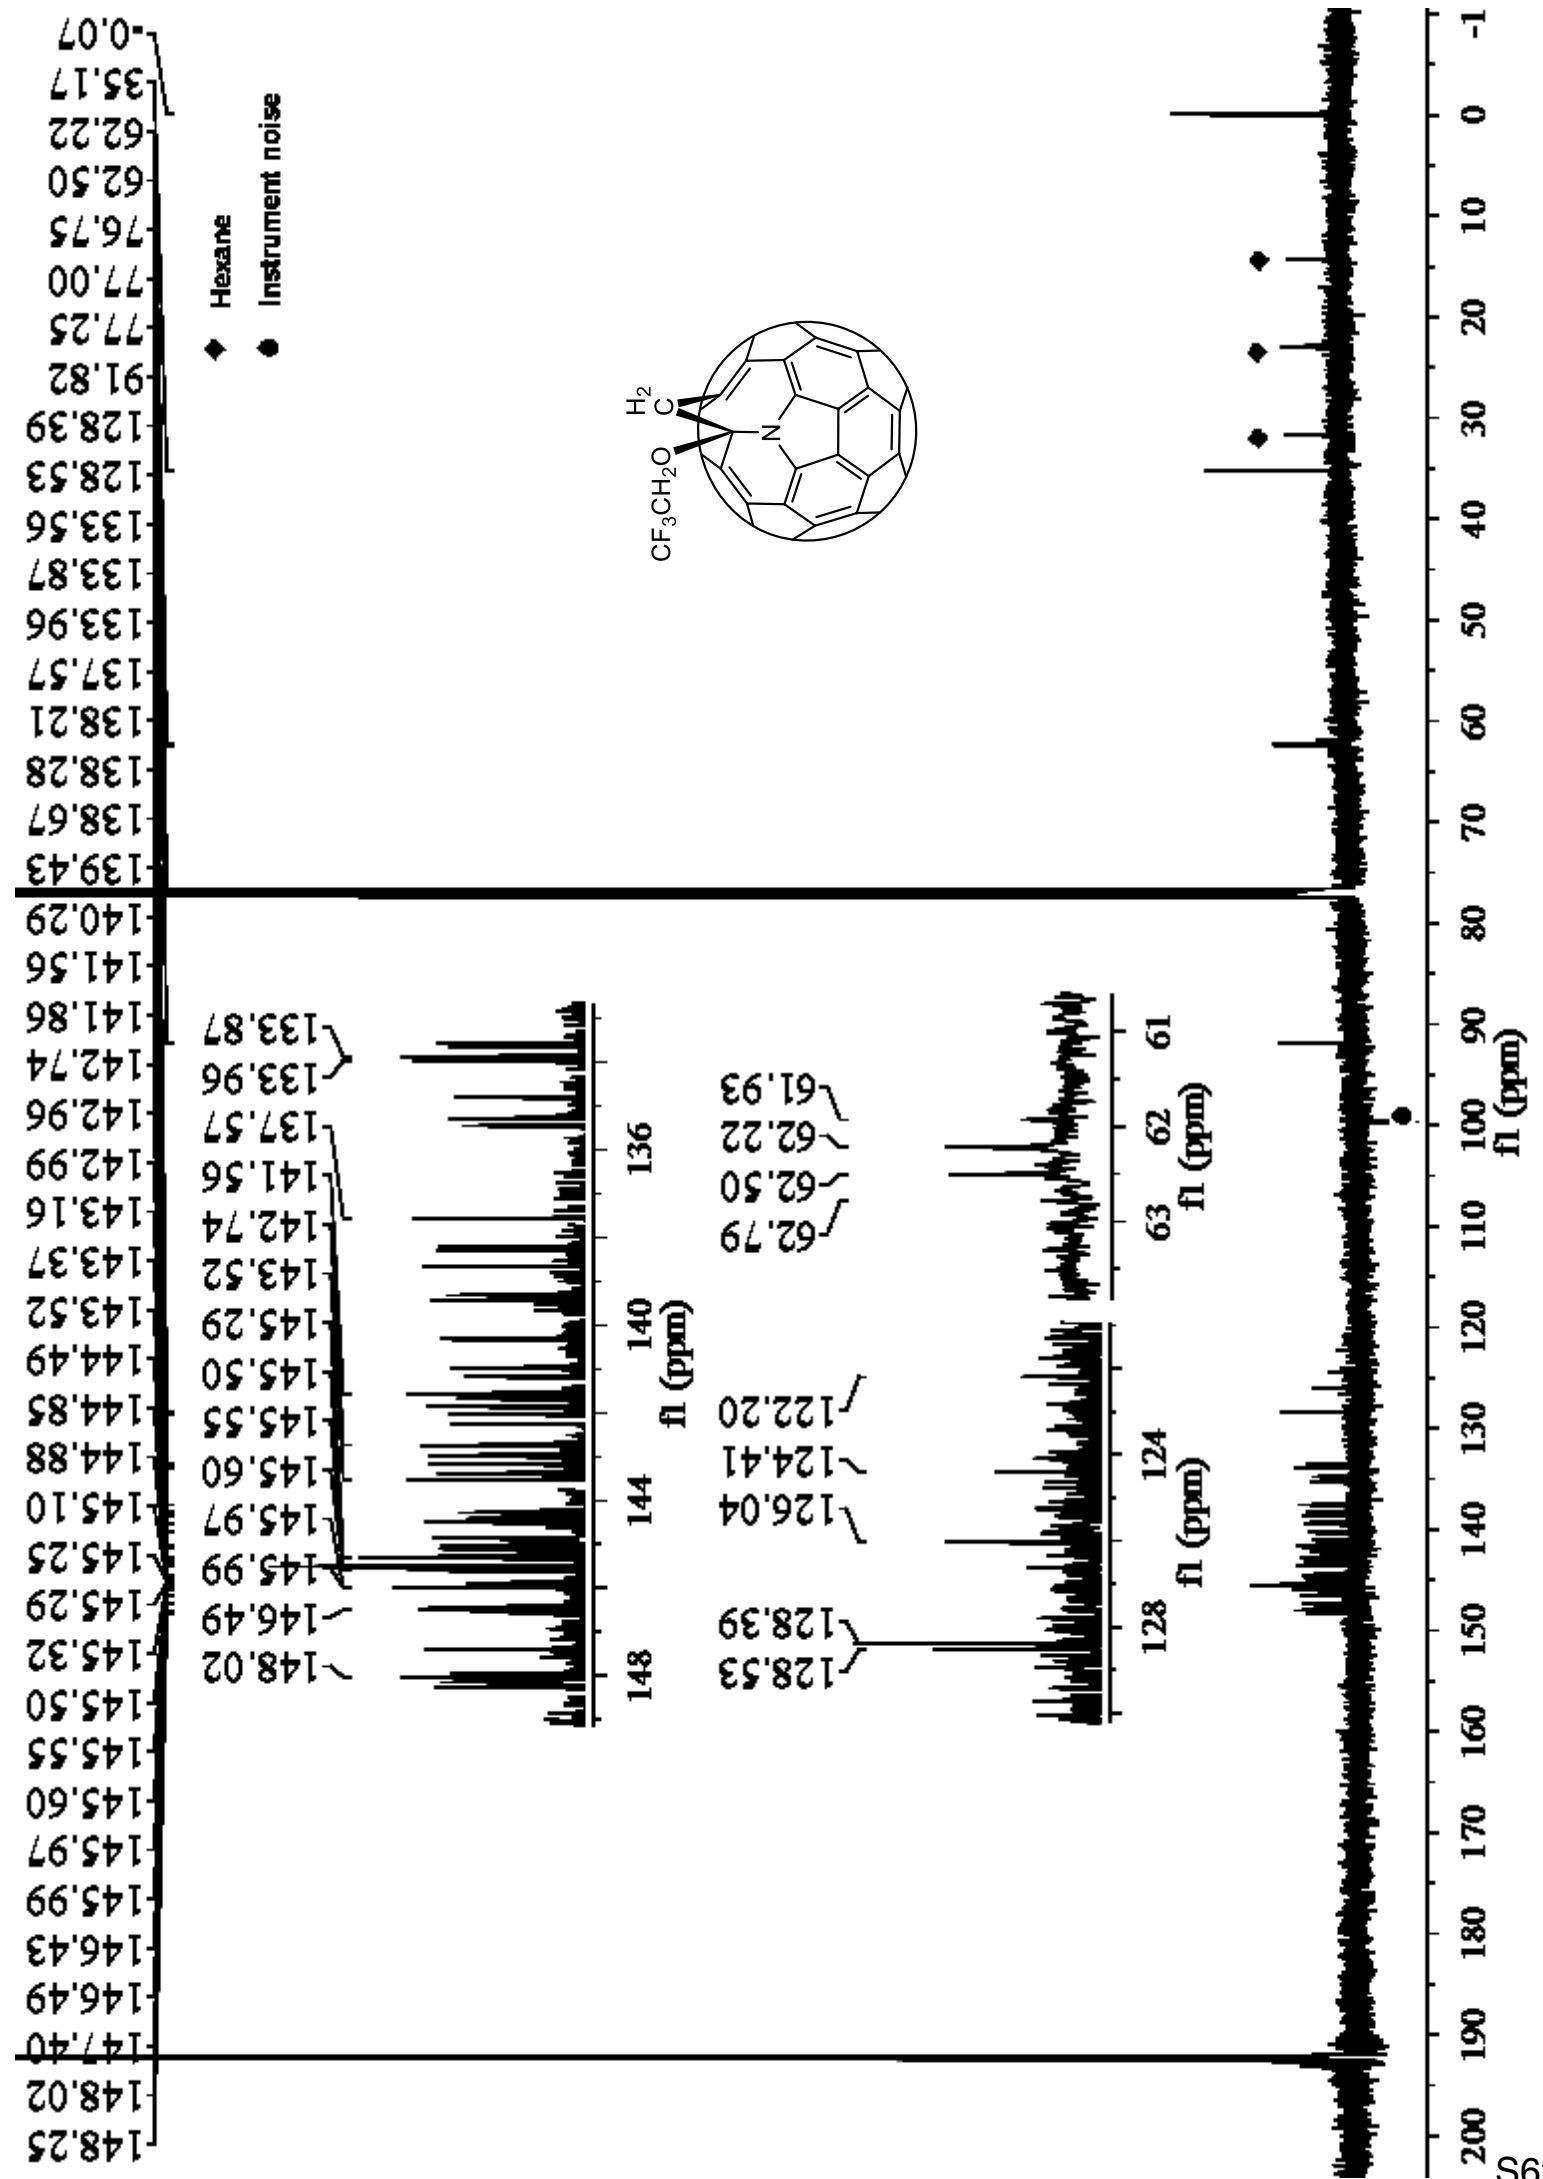

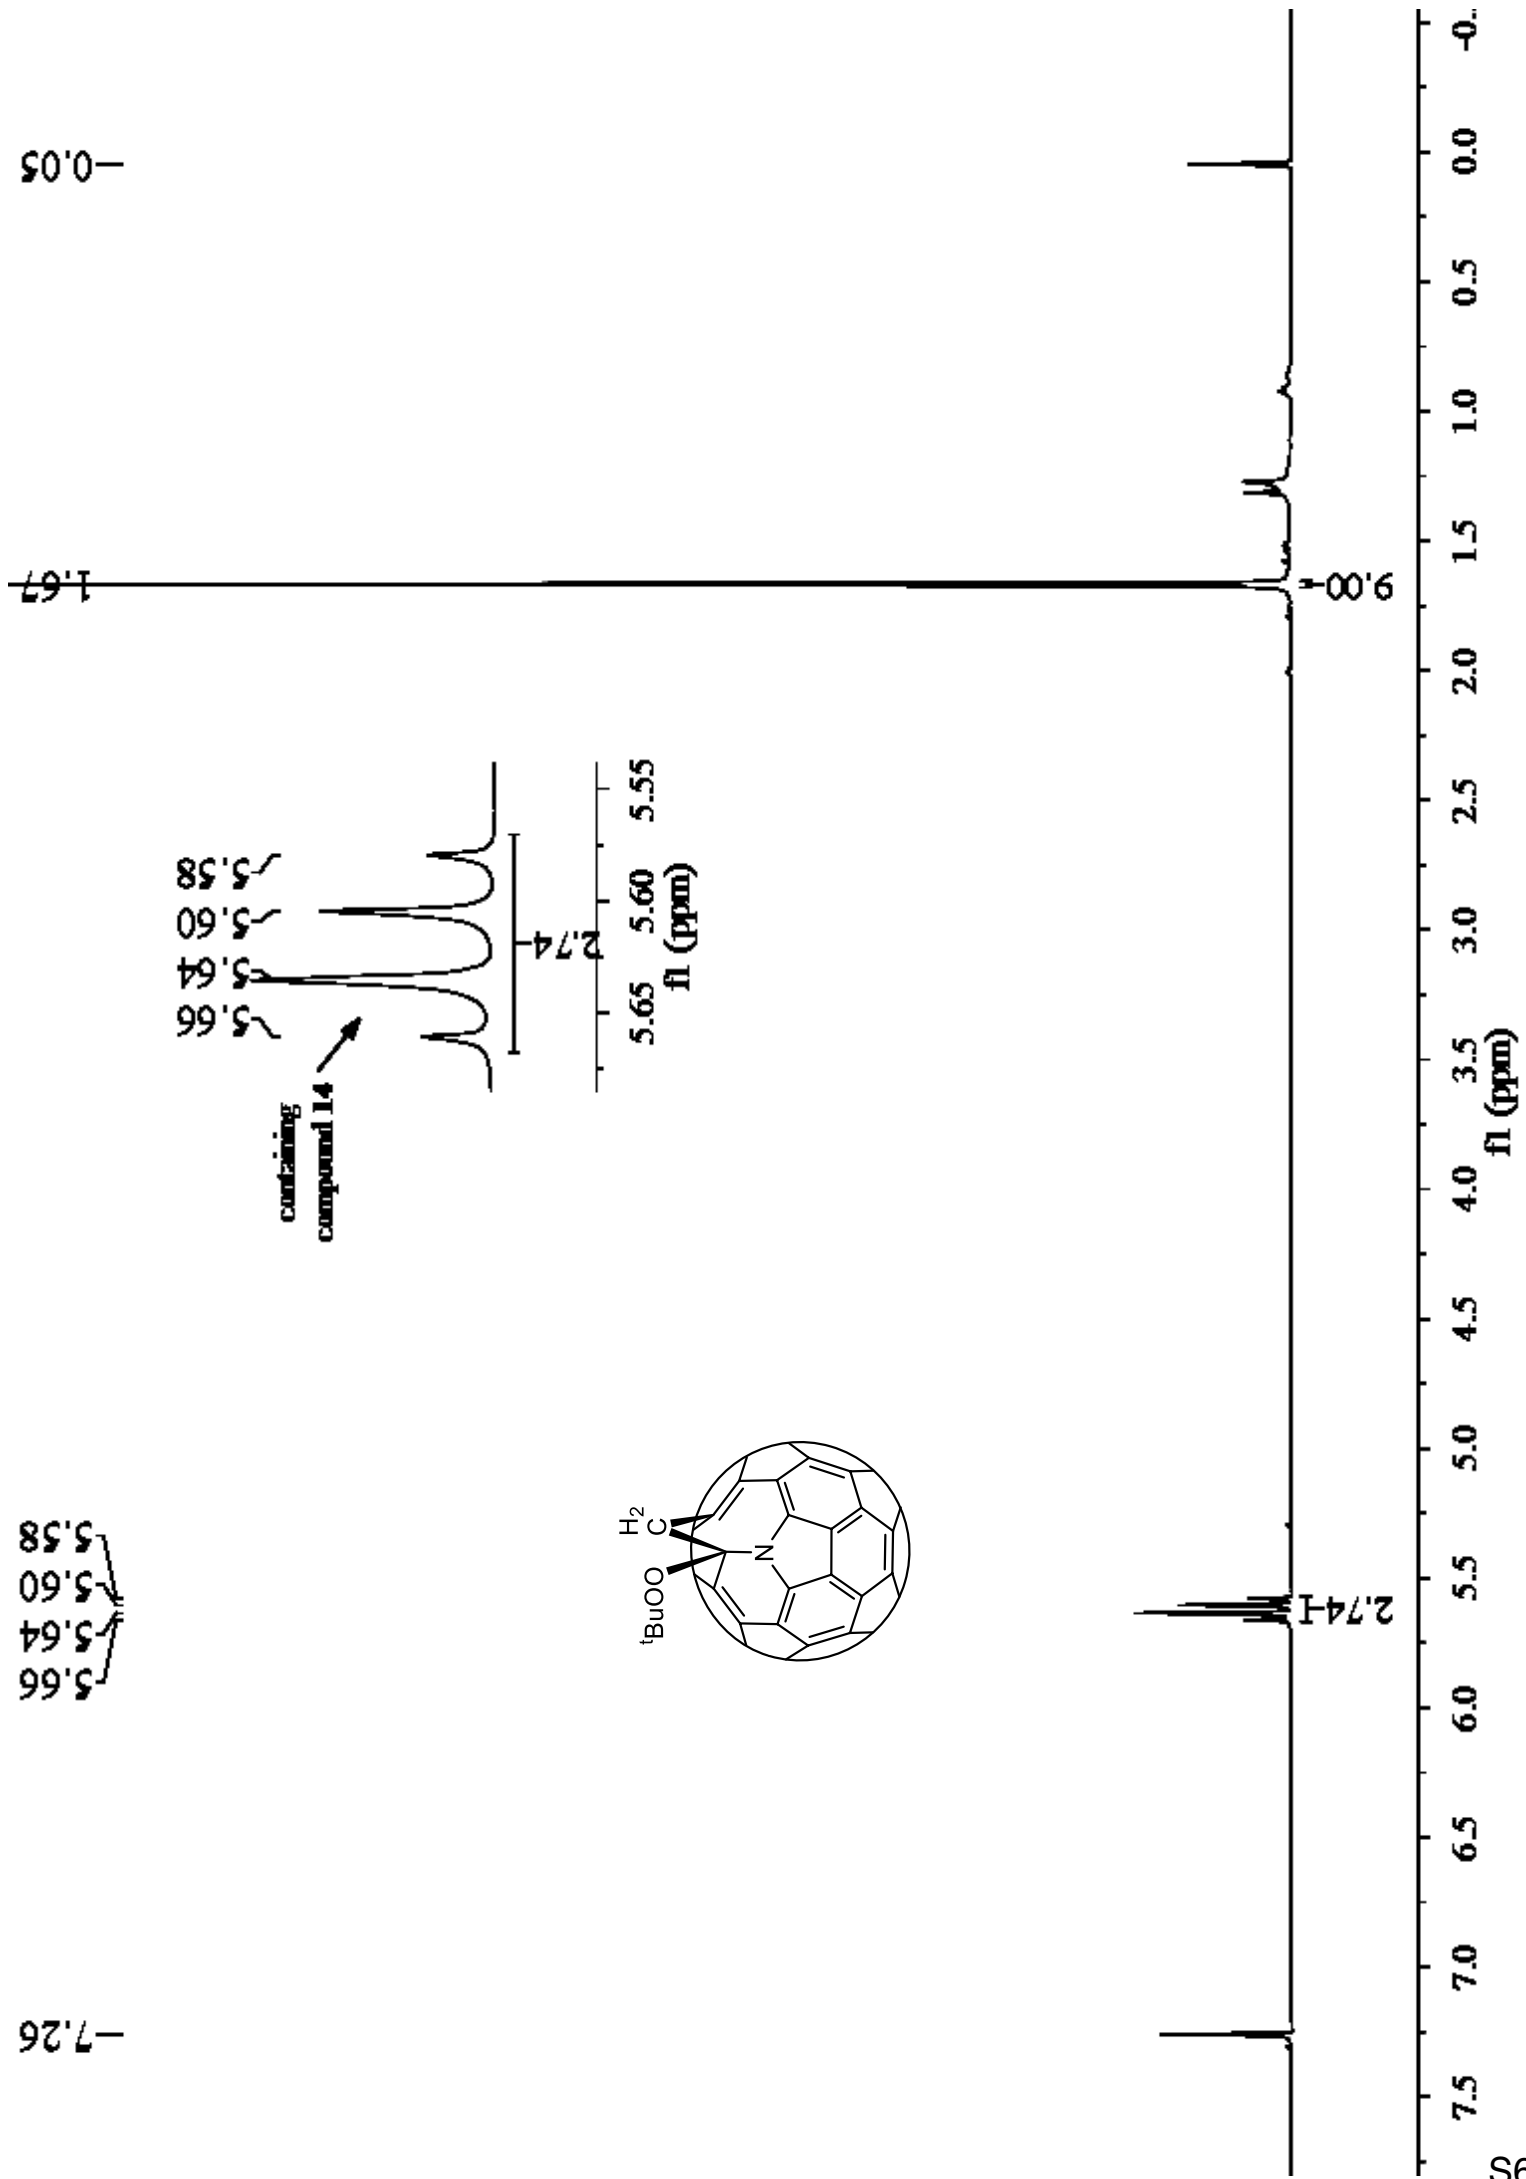

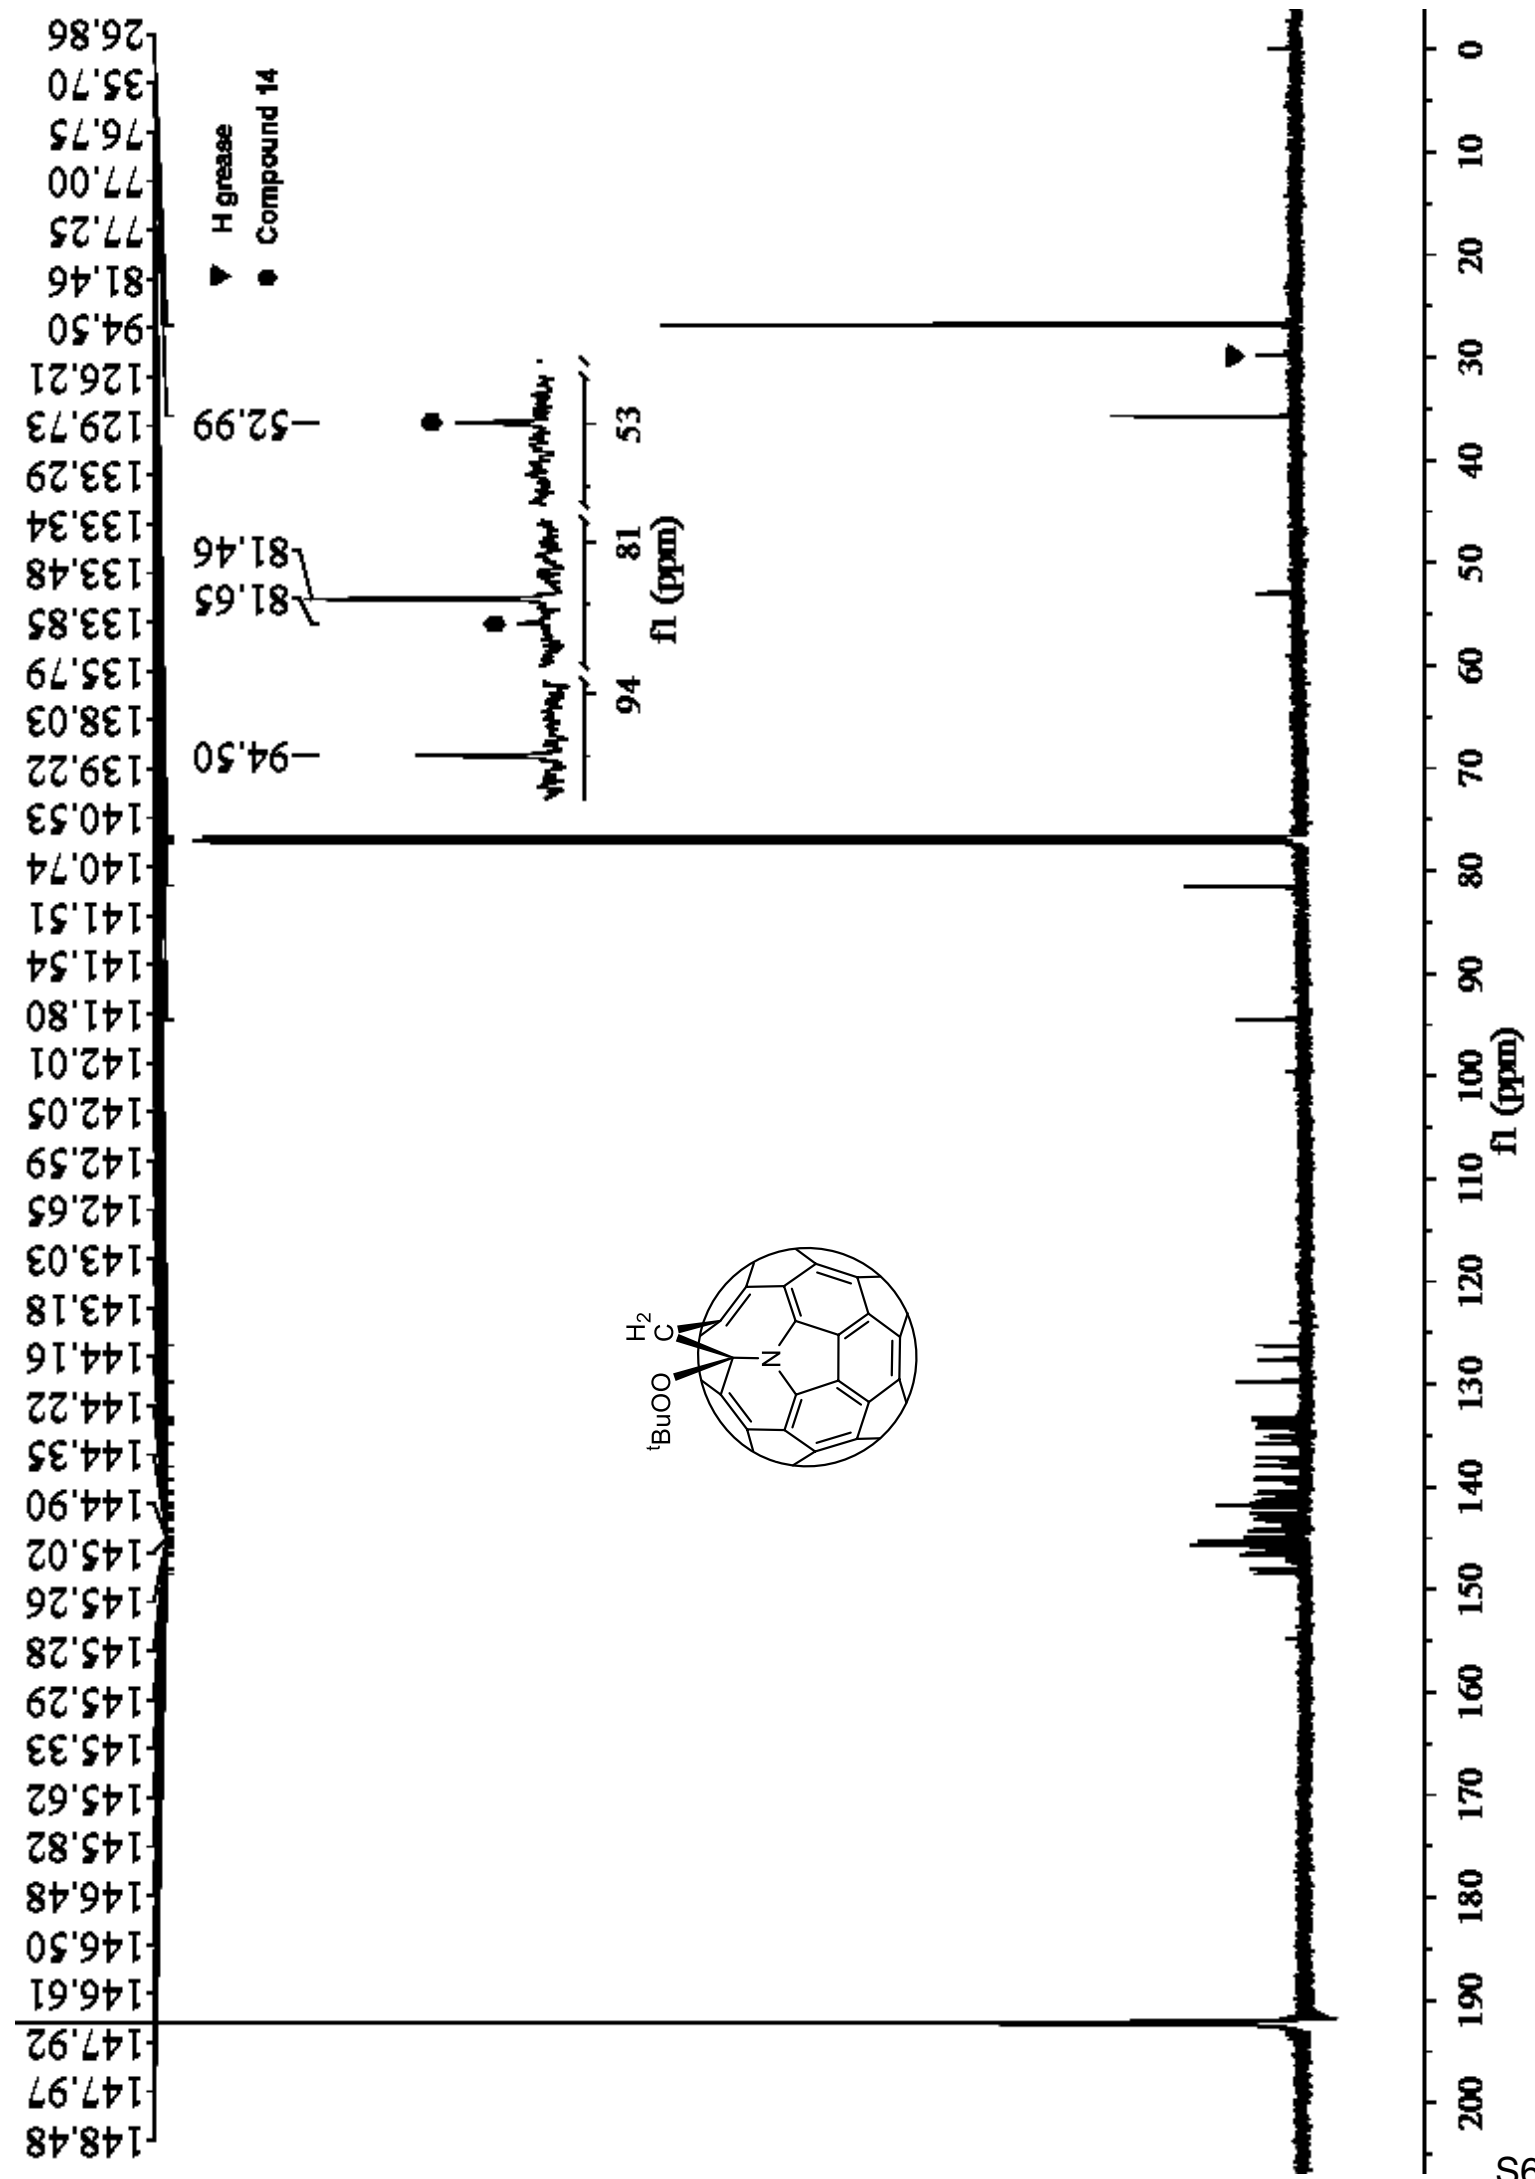





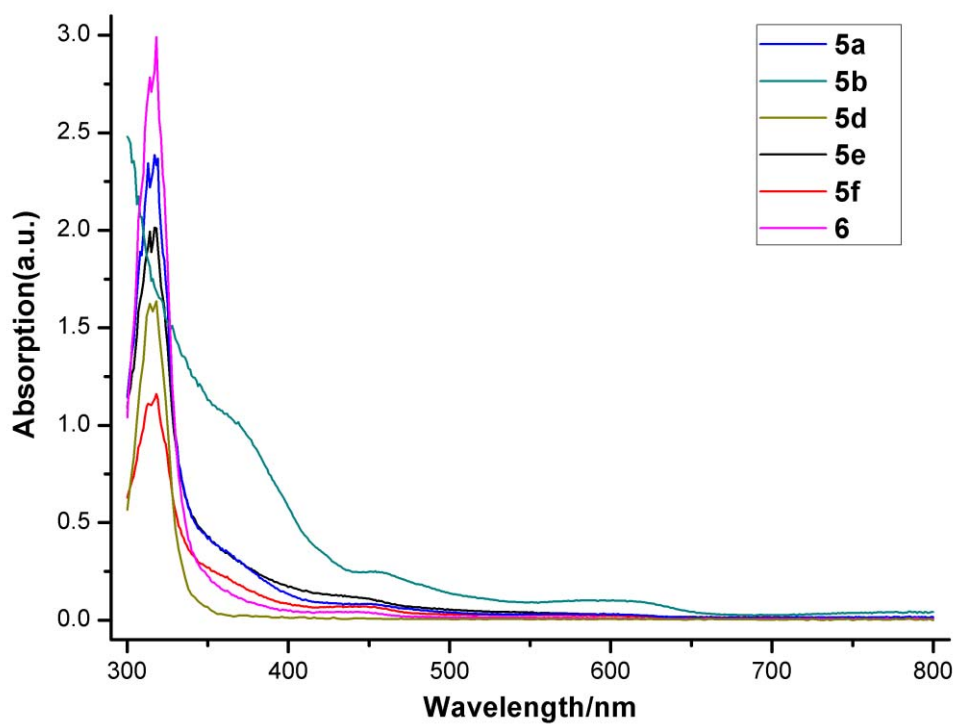

UV-Vis spectra for Compounds **5a**, **5b**, **5d**, **5e**, **5f**, **6** in  $\text{CHCl}_3$

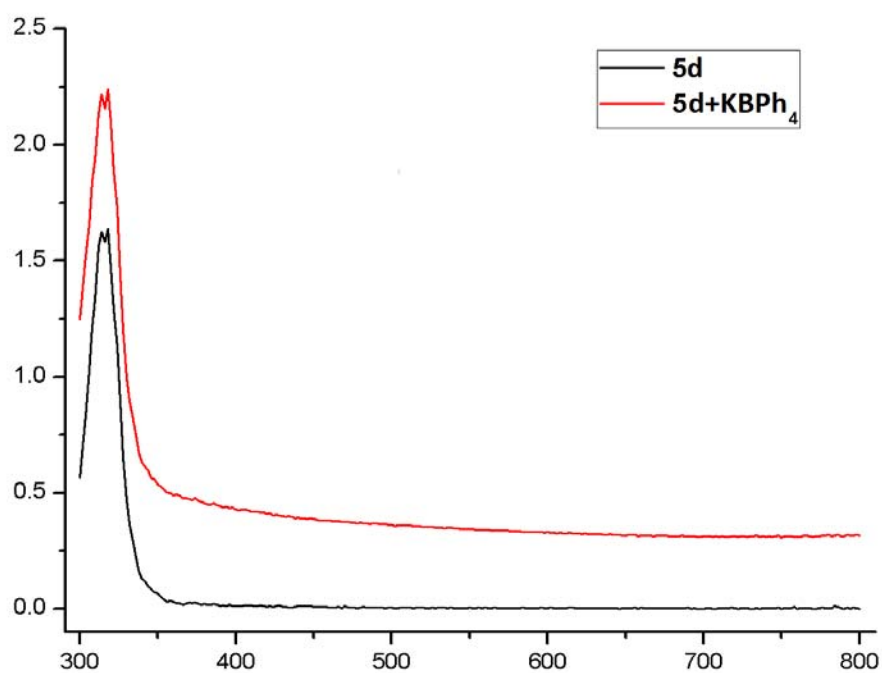

UV-Vis spectra for Compound **5d** & **5d**+ $\text{KBPh}_4$  in  $\text{CHCl}_3$

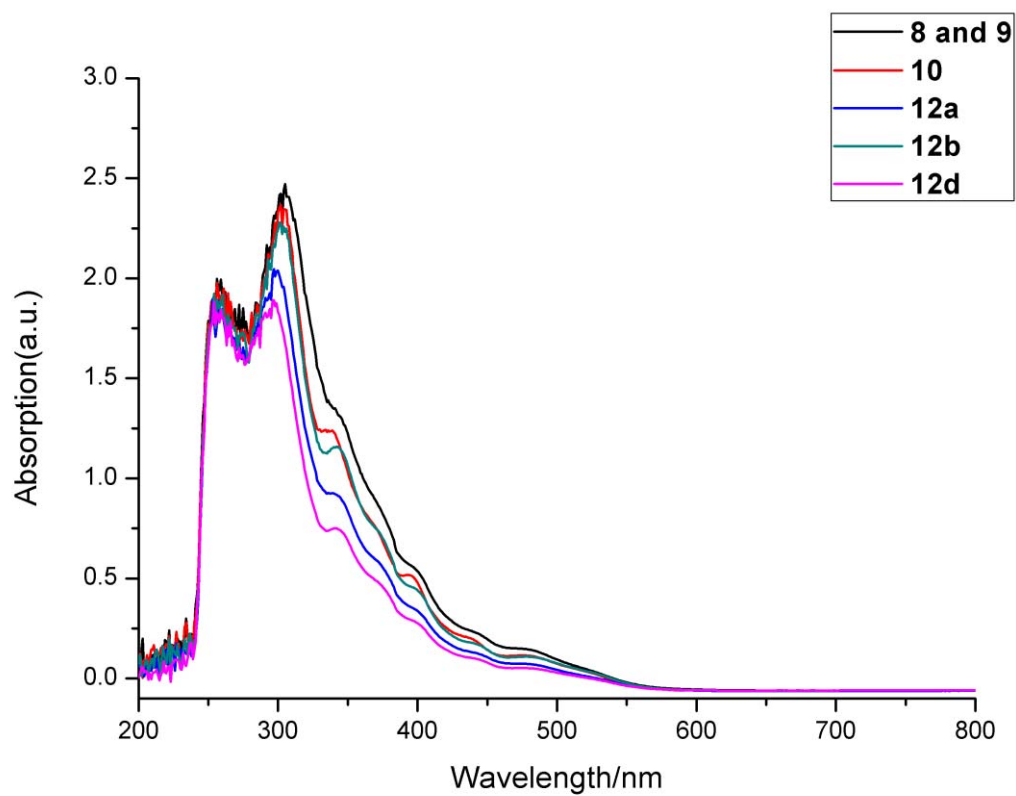

UV-Vis spectra for Compounds **8** and **9**, **10**, **12a**, **12b**, **12d** in  $\text{CHCl}_3$

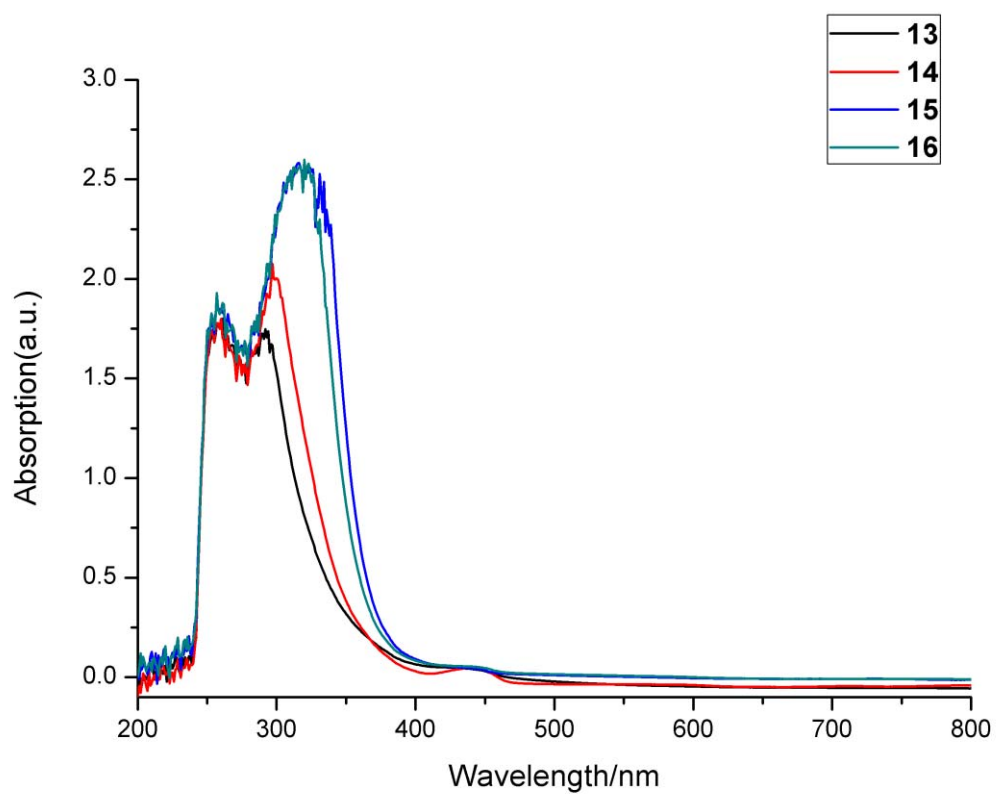

UV-Vis spectra for Compounds **13**, **14**, **15**, **16** in  $\text{CHCl}_3$
